## 25 Introduction

26

27 Parasitic nematodes are important parasites of humans, livestock and other animals. In  
28 humans, parasitic nematodes are responsible for 4 of the twenty World Health Organization-  
29 defined Neglected Tropical Diseases (WHO 2021). In natural ecosystems parasitic  
30 nematodes are highly abundant and so a major force affecting host populations (Lafferty *et*  
31 *al.*, 2005; Kuris *et al.*, 2008), so understanding parasites' biology is critical in understanding  
32 wider ecological patterns and processes. Study of the population genetics of parasitic  
33 nematodes can give important insights into their biology and patterns of transmission in host  
34 populations. This has been studied extensively in nematodes parasitizing livestock, for  
35 example finding that they exist with very large effective populations sizes, showing limited  
36 population genetic substructure, likely due to the high rate of livestock movement (Blouin *et*  
37 *al.* 1985; Redman *et al.*, 2015; Sallé *et al.*, 2019). The population genetics of parasitic  
38 nematodes infecting humans has also been investigated to understand their host range and  
39 zoonotic potential (Criscione *et al.*, 2007; Thiele *et al.*, 2018). In contrast, there has been  
40 much more limited study of the population genetics and genomics of nematodes infecting  
41 natural, unmanaged species (Cole and Viney, 2018).

42

43 *Strongyloides* spp. are a genus of parasitic nematodes, with two species – *S. stercoralis* and  
44 *S. fuelleborni* – infecting some 100-200 million people worldwide. *S. ratti* is a common  
45 parasite of rats, *Rattus norvegicus* (Fisher and Viney, 1998). In the *Strongyloides* spp. life  
46 cycle hosts are infected by parasitic female worms only that reproduce parthenogenetically  
47 (Viney, 1994), producing eggs that pass out of the host in its faeces. Outside of the hosts,  
48 larvae can develop directly into infective larvae that then infect new hosts. Alternatively, and  
49 facultatively, larvae outside of the host can develop into a single generation of free-living  
50 adult males and females that reproduce sexually (Viney *et al.*, 1993), with their progeny then  
51 also developing into infective larvae to infect new hosts. Genetically, this means that  
52 *Strongyloides* reproduces by obligatory mitotic parthenogenesis inside the host and by  
53 facultative sexual reproduction outside of the host. The choice between asexual, direct  
54 development and sexual, indirect development is affected by environmental conditions  
55 (particularly the host immune response and the temperature outside of the host), but  
56 genotypes also differ in their propensity for these two developmental routes (Viney *et al.*  
57 1992; Harvey *et al.* 2000).

58

59 *Strongyloides*' mode of reproduction is very likely to affect its population genetics. If  
60 reproduction is exclusively by mitotic parthenogenesis, then the only source of genetic  
61 variation is mutation, and such a population would consist of an assemblage of different  
62 genetic lineages. In this scenario the mutation rate of a species is key in determining the  
63 extent of variation within a population. The occurrence of some sexual reproduction would  
64 allow genetic lineages of parasites to recombine, though the extent to which this will happen  
65 depends on the frequency with which sexual reproduction occurs. A three locus study of *S.*  
66 *ratti* in the UK found that it consists of one interbreeding population, likely mainly reproducing  
67 by direct, asexual reproduction (Fisher and Viney, 1998).

68

69 *S. ratti* has a compact 43 Mbp genome consisting of 2 autosomes and an X chromosome,  
70 and its genome assembly is the second most contiguous assembled nematode genome

71 after the *C. elegans* reference genome. This facilitates the population genomic analysis of  
72 wild *S. ratti*. Further, genomic, transcriptomic and proteomic analyses have identified genes  
73 that are putatively critical to *Strongyloides*' parasitic lifestyle. These were characterised in  
74 two ways: genes whose expression was significantly greater in the parasitic female stage  
75 compared with the free-living female stage; and genomic clusters of genes coding for  
76 proteins belonging to one of three families (astacin-like metallopeptidases, CAP domain-  
77 containing proteins, acetylcholinesterases), which are gene families that have expanded as  
78 *Strongyloides* nematodes evolved to be parasites (Hunt *et al.*, 2016).

79

80 In many, but not all, host-parasite systems, parasites can locally adapt to their host  
81 population, which enhances the fitness of those parasite genotypes (Greischar *et al.*, 2007).  
82 The genes and gene products underlying parasite local adaptation are not well known. In  
83 *Strongyloides* the genes that have been shown to be central to its parasitism are at the  
84 interface between the parasite and its host and therefore may play a role in such adaptation.  
85 In such a scenario these genes could be under different selection pressures compared with  
86 the rest of the genome and so may have population genetic patterns that differ from the rest  
87 of the genome.

88

89 Here we report the whole-genome, fine-scale population genomics of *S. ratti* in a wild rat  
90 population, describing how parasite genotypes are distributed among individual hosts. We  
91 find that *S. ratti* populations exist as a mixture of asexual lineages. Comparison of these  
92 lineages with historical, geographically dispersed samples suggests that some of these  
93 lineages may be very widely spatially and temporally dispersed. We find that genes and  
94 gene clusters critical to the parasitic phase of the *S. ratti* life cycle are genetically  
95 hyperdiverse, compared with the rest of the genome, which may contribute to *S. ratti*'s local  
96 adaptation to its hosts within the context of existing as long-lived asexual lineages.

## 97 Results

98

### 99 ***S. rattii* is a common parasite of rats**

100 We sampled rat faecal pellets from three sites in the southwest UK (**Figure 1**), from which  
101 we isolated 10,471 *S. rattii* infective larvae from 114 pellets (from a sample of 308). The  
102 proportion of infected faecal pellets significantly differed among the three sites (13, 47 and  
103 62 % at sites CA, AM and LA respectively;  $\chi^2 = 48.9$ ,  $df = 2$ ,  $P < 0.0001$ ) (**Figure 1**;  
104 **Supplementary Table 1**), but is consistent with a previous report of a high prevalence of *S.*  
105 *rattii* in wild rats in the UK (Fisher and Viney, 1998). The number of *S. rattii* larvae per pellet  
106 ranged from 1 – 1,730 (**Supplementary Figure 1**). While culturing these faeces for *S. rattii*  
107 we did not observe any sexual free-living adults. We genotyped rat faecal pellets to assign  
108 these to individual rats finding that 132 genotyped pellets belonged to 112 rats.

109

### 110 ***S. rattii* is partially genetically clustered at sample sites**

111 We investigated the population genetics of *S. rattii* by analysing whole genome sequence of  
112 90 individual infective larvae collected from the three sites. We identified 170,666 SNPs,  
113 giving an average density of 4.1 SNPs per kb. A total of 614 SNPs were tri-allelic, the  
114 remainder bi-allelic, with a ratio of 1.77 of transitions to transversions. Considering all SNPs  
115 together, the 90 parasites were in HWE ( $\chi^2 = 13.65$ ,  $df = 19.35$ ,  $P = 0.48$ ) but this varied  
116 among SNPs. Overall, there was more heterozygosity than expected; specifically, allele  
117 frequencies predicted that 28% of SNP loci would be heterozygous in individual worms,  
118 whereas 36% (range 28-58%) were.

119

120 We analysed the pattern of parasite population genetic variation (i) within and among rat  
121 hosts, and (ii) within and among sampling sites, finding evidence of some differentiation of  
122 the parasites among the sample sites. The pairwise relatedness ( $\Phi$ ) among the 90 parasites  
123 was non-normal (Shapiro-Wilkes test for normalcy  $W = 0.902$ ,  $P < 0.0001$ ), suggesting  
124 genetic clustering among the worms at some level (**Supplementary Figure 2**). *S. rattii*  
125 parasitic females reproduce by mitotic parthenogenesis (Viney, 1994) and so siblings will  
126 be genetically identical save for individual-specific mutations. We did not detect putative  
127 sibling parasites within individual rats, despite sampling up to 4 parasites from each rat.  
128 (**Supplementary Figure 3**). This suggests that faecal pellets commonly contained larvae of  
129 more than 4 genotypes. In faecal pellets containing  $\geq 10$  larvae, if there indeed had only  
130 been 4 genotypes present then our chance of detecting the 4 was  $\leq 0.19$ . It is more likely  
131 that faecal pellets contained worms of more than 4 genotypes. Specifically, we had a  $\geq 0.50$   
132 chance of detecting 4 unique genotypes when:  $\geq 6$  genotypes were actually present in  
133 pellets containing 12-18 larvae;  $\geq 7$  genotypes were present in pellets containing 19-31  
134 larvae. The average relatedness among pairs of parasites from the same rat and among  
135 parasites from different rats ( $\Phi = 0.22$  and  $0.214$ , respectively), was not significantly different  
136 ( $t = -0.32$ ,  $df = 108.81$ ,  $P = 0.75$ ). Thus, we conclude that individual rats contain genetically  
137 diverse parasites (consistent with our *S. rattii* RFLP genotyping, see Materials and Methods  
138 section), meaning that genetic clustering of parasites is not at the level of the rat.

139

140 However, parasites from the same sample site were more closely related (mean same site  
141  $\Phi = 0.225$ ; single, same site  $\Phi$ , CA = 0.128, LA = 0.258, AM = 0.227) than parasites from  
142 different sample sites ( $\Phi = 0.206$ ) ( $t = -3.68$ ,  $df = 3975.9$ ,  $P \leq 0.001$ ) (**Figure 2**). Overall,  $F_{ST}$

143 was very low (0.02), and indeed zero between parasites at the two English sample sites  
144 (**Figure 2**). Together, these results show that there is some genetic clustering of *S. ratti* at  
145 the level of the sampling site, but not at the level of individual rats.

146

### 147 ***S. ratti* consists of divergent genetic clades that are widely distributed**

148 We examined the parasite diversity more closely by constructing neighbour-joining  
149 dendrograms. This revealed five parasite clades, with most worms (78 of the 90) in one of  
150 three clades (clades 1 – 3) (**Figure 3A**). Maximum likelihood trees also confirmed the  
151 existence of these clades (**Figure 3B; Supplementary Figure 4**). We examined the  
152 admixture among the 90 parasites, which most reliably grouped the parasites into five  
153 genetic groups, corresponding to the five clades defined by the neighbour-joining tree  
154 (**Figure 3C; Supplementary Figure 5**).

155

156 Parasites belonging to the three main clades were present in all three sampling sites, in  
157 ratios expected based on the number of sequenced parasites from each sampling site  
158 (Fisher's exact test,  $P = 0.14$ ). Individual rats contained parasites from multiple clades;  
159 specifically, 11 rats contained parasites from two clades, and 3 rats contained parasites from  
160 three clades. Principal Component Analysis produced similar results, showing clustering of  
161 parasites within clades, and that these clades were dispersed across the three sampling  
162 sites (**Supplementary Figure 6**).

163

164 Analysis of  $\Phi$  and  $F_{ST}$  within and among clades 1 – 3 is consistent with *S. ratti* being  
165 structured into sympatric, genetically distinct clades, with the three clades dispersed across  
166 the three sampling sites. Specifically,  $\Phi$  was high within clades, especially clades 1 and 3  
167 (0.43 and 0.45, respectively), but lower between clades;  $F_{ST}$  among the clades was 0.3 and  
168 similar (0.22 – 0.35) between clades (**Table 1**). Given that we did not observe any free-living  
169 sexual stages of *S. ratti* this further suggests that these clades are asexually derived and  
170 maintained.

171

172 The population genetic structure of *S. ratti*'s mitochondrial genome consists of three  
173 divergent genetic clades that are not strongly associated with sampling sites, which is  
174 consistent with the nuclear genome results. Specifically, in the mitochondrial genome we  
175 identified 156 SNPs (average density 9.3 SNPs per kb) identifying 58 haplotypes among the  
176 90 parasites. There was a strong, positive correlation between the pairwise similarities of  
177 mitochondrial and nuclear genomes (Mantel test,  $r = 0.76$ ,  $P < 0.01$ ), and between minimum  
178 spanning maps of mitochondrial haplotypes and neighbour-joining trees of nuclear genomes  
179 (**Supplementary Figure 7**). The number of mitochondrial SNPs in same sampling site and  
180 different sampling site comparisons (23.6 and 24.2, respectively) were not significantly  
181 different ( $t = -0.98$ ,  $df = 3771$ ,  $P = 0.33$ ).

182

183 We wanted to investigate if the rat host population genetic structure enforced a population  
184 genetic structure on the parasites because of the partitioning of parasites among individual  
185 hosts. To do this we investigated the population genetics of the rats by genotyping faecal  
186 pellets at nine microsatellite locus (**Supplementary Table 2**). These loci were generally not  
187 in Hardy-Weinberg equilibrium (HWE); specifically 8, 3 and 5 of the 9 loci at sites CA, AM  
188 and LA, respectively, were not (**Supplementary Table 3**). Rat allele frequencies differed

189 markedly among sampling sites, consistent with restricted rat gene flow among the sites.  
190 The pairwise relatedness among rats was higher within sites than among sites (average  
191 Ritland and Lynch relatedness values 0.06 and -0.06, respectively), and the distribution of  
192 these relatedness values at each site had a right-hand skew (**Supplementary Figure 8**),  
193 showing more closely related pairs of individual rats within sites than expected by chance.  
194 We could assign rats to each sample site based on allele frequencies with 89% accuracy.  
195 Shannon's mutual information index ( $^S H_{UA}$ ), which does not assume HWE (Hedrick, 2005;  
196 Jost *et al.*, 2018), shows that there is moderate genetic differentiation among rats from the  
197 three sites (**Figure 2**). Together these results – differences in allele frequencies among  
198 sample sites, higher within-site than among-site relatedness, high accuracy in assignment  
199 to sample site, moderate values of  $^S H_{UA}$  – shows that there is genetic differentiation among  
200 rats at the three sampling sites. The evidence of moderate genetic differentiation among  
201 rats at sample sites is broadly consistent with the geographical separation of the three sites,  
202 and with limited rat migration of rats among the sites (**Figure 1**), as has been observed with  
203 urban rats (Combs *et al.* 2017). Notably, the genetic structure of the *S. rattii* populations does  
204 not mirror that of its rat hosts.

205

206 To further investigate the spatial and temporal extent of the *S. rattii* clades we examined the  
207 whole genome sequences of 10 *S. rattii* isofemale lines derived from rats sampled from the  
208 UK and Japan between 1989 and 2012 (**Supplementary Table 4**). A neighbour-joining  
209 dendrogram of these isofemale lines and the 90 wild parasites (sampled in 2017/18) showed  
210 that these isofemale lines are not genetically distinct from the 90 parasites, occurring in  
211 clades 1, 2 and 4 (**Supplementary Figure 9**). This observation therefore suggests that  
212 these *S. rattii* genotypes exist as long lived, asexually maintained lineages and that they  
213 have a wide geographical representation, possibly one that is global.

214

215 If *S. rattii* does exist as ancient asexually derived and maintained lineages, then whole-  
216 genome linkage might be expected. Within clades 1 and 3 (where sufficient samples were  
217 available to be analysed) LD was higher, and decayed more slowly with genomic distance,  
218 compared with the decay in all 90 parasite samples (**Supplementary Figures 10 and 11**).  
219 Clade 3's LD was higher and decayed more slowly with distance than clade 1's. Clades 1  
220 and 3 also had linkage blocks spanning tens of kilobases on some chromosomes  
221 (**Supplementary Figure 12**), which was not seen among all 90 parasites (**Supplementary**  
222 **Figure 13**). These patterns of within-clade LD are also consistent with these *S. rattii* clades  
223 being long-lived, asexually maintained lineages.

224

225 In summary, these results show that *S. rattii* populations consist of mixtures of different  
226 genetic clades consisting of asexually maintained lineages that are likely long lived and  
227 widely distributed across the host population. These clades may exist on a much larger  
228 scale, nationally across the UK, possibly globally, and over decades. The *S. rattii* life cycle  
229 is obligately mitotically parthenogenetic (Viney 1994), with facultative sexual reproduction  
230 (Viney *et al.*, 1993); the population genetic structure that we have observed suggests that  
231 sexual reproduction occurs vary rarely, if at all, in these populations. We observe no obvious  
232 geographical localisation of the different parasite clades, which might be expected with  
233 geographically-based host local adaptation. Indeed, given the likely asexual reproduction

234 these populations it would therefore appear that *S. ratti* cannot genetically adapt to its local  
235 host populations except through mutational processes.

236

### 237 ***S. ratti* genes involved in parasitism are highly diverse**

238 We next investigated the diversity of genes that *S. ratti* uses in the parasitic phase of its life  
239 cycle. We focussed on two sets of genes: (i) “parasitism genes”, which are genes whose  
240 expression is at least one log<sub>2</sub>-fold greater in the parasitic female morph compared with the  
241 free-living female morph, and (ii) “expansion clusters”, which are genomic regions containing  
242 four or more genes coding for members of either astacin-like metallopeptidases, CAP  
243 domain-containing proteins, or acetylcholinesterase protein families, which previous  
244 analyses have identified as families that have expanded with *Strongyloides*’ evolution of  
245 parasitism (Hunt *et al.*, 2016).

246

247 Genetic diversity in *S. ratti* is not evenly distributed across the *S. ratti* genome  
248 (**Supplementary Figure 14**), and we identified high SNP diversity regions, consisting of  $\geq$   
249 200 SNPs per 10 kb. We firstly asked how often parasitism or free-living (which are *vice*  
250 *versa* compared with parasitism genes) genes occurred in these high SNP diversity regions.  
251 We found that parasitism genes were significantly over represented within these high  
252 diversity regions, compared with their representation in highly conserved genomic regions  
253 ( $\leq 4$  SNPs per 10 kb region), or across the genome as a whole (**Figure 4A; Supplementary**  
254 **Table 5**). In contrast, free-living genes were represented at the same rate in high diversity  
255 regions, highly conserved regions, and across the genome as a whole (**Figure 4A**).

256

257 Furthermore, two classes of genes – those coding for astacin-like metallopeptidases and for  
258 CAP-domain domain proteins, both of which are associated with parasitism in *S. ratti* – were  
259 more common in these highly diversity regions, compared with the genome as a whole.  
260 Specifically, 5.6 and 11.8 % (95% confidence intervals 2.6-10.3 and 6.3-16.4 %,  
261 respectively) of genes in these regions code for astacin-like metallopeptidase and CAP  
262 domain proteins, which is higher than their representation across the whole genome (1.5  
263 and 0.7 %, respectively).

264

265 We compared the SNP density among the hundred most parasitic and most free-living  
266 genes, though we excluded six of the parasitism genes due to concerns about their  
267 underlying sequence assembly, leaving 94 parasitic genes (**Supplementary Tables 6 and**  
268 **7**). Parasitism gene SNP density was approximately four times that of free-living genes, or  
269 that of the genome as a whole (**Figure 4B**). The SNPs in these parasitism genes mainly  
270 code for non-synonymous substitutions, rather than synonymous substitutions, which  
271 contrasts with free-living genes, where the rate of both types of SNPs occurred with similar  
272 frequency (**Figure 4C**).

273

274 We also found evidence of high genetic diversity in *S. ratti*’s expansion clusters, compared  
275 with the flanking regions (**Supplementary Table 8**). SNPs were three times more dense in  
276 the expansion clusters than in the flanking regions (SNP density (SD) per kb 15.9 (18.3) and  
277 4.6 (7.2), in expansion clusters and flanking regions, respectively). Strikingly, SNPs within  
278 expansion clusters were approximately twice as likely to code non-synonymously, rather  
279 than synonymously, unlike the flanking regions where these rates were similar (**Figure 5D**);

280 a pattern also seen for each individual expansion cluster, except clusters 1 and 8  
281 (**Supplementary Table 5**).

282

283 We thought about possible reasons for the elevated genetic diversity in genes involved in  
284 *S. rattii*'s parasitism. Parasites can locally adapt to their hosts, to maximise parasite fitness,  
285 and we hypothesised that evolution of the expansion clusters, independent of the rest of the  
286 genome, could be a means by which host local adaptation occurs, where the expansion  
287 clusters evolve differently from the rest of the genome. To investigate this, we created  
288 neighbour-joining trees based on individual expansion clusters to see if they strongly  
289 diverged from the whole genome-based trees. However, in these expansion cluster-specific  
290 trees, the whole genome-defined clades 1 and 3 were still strongly evident (**Supplementary**  
291 **Figure 15**). We next measured the selection in the expansion clusters and their flanking  
292 regions, but could also find no consistent evidence for diversifying selection in the expansion  
293 clusters compared with their flanking regions (**Supplementary Table 9**). These results  
294 therefore do not support the idea that the expansion clusters are locally adapting to host  
295 genotypes.

296

297 Together, these observations – that highly variable genomic regions have an over-  
298 representation of parasitism genes, and of astacin-like metallopeptidase and CAP domain  
299 coding genes; that parasitism genes have SNP densities that are higher than those of free-  
300 living genes; that parasitism genes have a comparative excess of non-synonymous-coding  
301 SNPs; that expansion clusters have higher SNP densities and an excess of non-  
302 synonymous-coding SNPs – shows that in *S. rattii* there is a concentration of genetic diversity  
303 within genes and genomic regions that very likely play a key role in the parasitic phase of its  
304 life cycle.



## 305 Discussion

306

307 Parasitic nematodes are ubiquitous parasites of animals and are partitioned among  
308 individual hosts, between which they must transmit and so parasite and host biology can  
309 affect their population genetic structure ((Blouin *et al.* 1985; Cole and Viney, 2018).  
310 Understanding the population genetics of parasitic nematodes can give an insight into their  
311 population biology, which is poorly known outside of species infecting humans and livestock  
312 (Cole and Viney, 2018).

313

314 For the facultatively sexual parasite of rats *S. ratti* we have discovered that its population  
315 consists of a mixture of genetically diverse clades, where those clades are widely dispersed  
316 across host populations (and possibly on a global scale), with very little evidence of  
317 structuring across three host populations. This is a pattern of population genetic variation  
318 that has not, as far as we are aware, been observed in a parasitic nematode before. The life  
319 cycle of *S. ratti* contains an obligatory asexual parthenogenetic stage (Viney, 1994), as well  
320 as a facultative sexual stage (Viney *et al.*, 1993). We observed no sexual stages during our  
321 work, suggesting that sexual reproduction is very rare, or even absent, in these populations,  
322 consistent with previous observations (Viney *et al.* 1992; Fisher and Viney, 1998). The  
323 population genetics of the populations that we studied is also consistent with the absence  
324 of sexual reproduction.

325

326 In contrast to the parasites' population genetic patterns, the host rat populations did show  
327 some evidence of population genetic differentiation among the different sample sites,  
328 consistent with restricted movement of rats between the sites. Studies of the population  
329 genetics of rats in cities have also shown evidence of limited dispersal of rats and so  
330 population genetic differentiation among rats in different city regions (Gardner-Santana *et*  
331 *al.*, 2009).

332

333 Understanding a parasite's population genetic structure can be important in understanding  
334 the host range of a parasite, which is of applied interest for parasites of humans. For  
335 example, population genetic analysis has been used to understand the possibly changing  
336 host range of Guinea worm (*Dracunculus medinensis*) in human and dog hosts during  
337 sustained control efforts in human populations (Durrant *et al.*, 2020). There is considerable  
338 interest in understanding the host range of *S. stercoralis* that infects people; specifically,  
339 *Strongyloides* in dogs has been considered to be a source of human infection (Jaleta *et al.*,  
340 2017). If the population genetic structure we have observed with *S. ratti* – a mixture of  
341 asexually maintained clones widely distributed across host populations – also pertains in *S.*  
342 *stercoralis*, then there is likely to be considerable complexity in understanding the population  
343 genetics and host range of *S. stercoralis* genotypes. Where a species exists as a collection  
344 of asexually maintained lineages, then each lineage could diverge genetically, which raises  
345 the possibility that *S. stercoralis* could exist as a mixture of lineages each with different host  
346 ranges, for example some able only to infect people, some only able to infect dogs and some  
347 intermediate. Current approaches to studying the host range of *S. stercoralis* have  
348 commonly only used single or a few loci, which might not be able to resolve more complex  
349 patterns of population genetic variation.

350

351 Genomic analyses of *Strongyloides* have discovered genes and gene families that play a  
352 critical role in the parasitic phase of its life cycle. We have discovered that in wild *S. ratti*  
353 both parasitism genes and genes in expansion clusters are highly diverse compared with  
354 other genes. Of particular note, many of these SNPs in the parasitism genes and genes in  
355 expansion clusters we observed are predicted to code for non-synonymous substitutions,  
356 meaning that this genetic diversity may cause functional differences in the gene products.  
357 The parasitism genes and genes in expansion clusters are dominated by large gene  
358 families. Large families can allow genetic diversity to accumulate among gene family  
359 members because any potential negative fitness consequence of a mutation in one gene of  
360 a family, could be effectively ameliorated by others in that family. In this way, large gene  
361 families can allow the exploration of genetic space.

362  
363 Our observation of comparatively high genetic diversity in these genes is particularly  
364 interesting in light of recent observations of genetic diversity in the free-living nematode  
365 *Caenorhabditis* spp. Specifically, analysis of worldwide populations of *C. elegans* find that  
366 genetic variation is concentrated in a number of genomic regions (56 and 19 kb mean and  
367 median size, respectively), with evidence suggesting that diversity in these regions is  
368 maintained by balancing selection (Lee *et al.*, 2021). In the *C. tropicalis* genome, genetic  
369 variation is also distributed heterogeneously across its genome, for example with some 140  
370 high genetic diversity classified regions extending for no more than 30 kb (Noble *et al.*,  
371 2021). While there is a superficial similarity between the patterns of genomically  
372 concentrated genetic diversity in two *Caenorhabditis* species and in *S. ratti*, the mechanisms  
373 generating these patterns might be different. Notably, in *S. ratti* we did not find any evidence  
374 of diversifying selection in the expansion cluster genes. What these two *Caenorhabditis*  
375 studies and the present study do demonstrate is that detailed, whole genome analysis of  
376 wild individuals is uncovering hitherto un-expected patterns of genomic diversity, which are  
377 likely to exist in other taxa too, and which need to be investigated.

378  
379 Parasites have commonly been found to locally adapt to their host populations (Lively *et al.*,  
380 2004; Greischar and Koskella, 2007). If such a phenomena was occurring in *S. ratti*, then it  
381 may be manifest as geographical clustering of parasite genotypes *per se* or geographical  
382 clustering of parasitism gene genotypes and, or expansion cluster genotypes. However, the  
383 dispersion of *S. ratti* genotypes and of the genetic diversity in parasitism genes and  
384 expansion clusters that we have observed does not show any suggestive signatures of such  
385 local adaptation to hosts.

386  
387 Alternatively, mindful that the products of the parasitism genes and genes in expansion  
388 clusters interface with the host, some variants of these genes may give a parasite a fitness  
389 advantage when infecting certain host genotypes, compared with parasites with other  
390 variants. Each individual parasite's suite of these genes may therefore represent a  
391 combination of different variants that have been selected for as these parasite lineages have  
392 over their history infected a range of host genotypes. In this scenario, these parasites are  
393 not locally adapted to their host genotypes *pe se*, but rather have available a set of gene  
394 variants that are appropriate for a wide range of already-encountered host genotypes.  
395 Notwithstanding, further research is needed to understand the full biological significance of  
396 high levels of genetic diversity in genes underlying *S. ratti*'s parasitism.

397

398 Our whole-genome, single worm analysis of wild *S. ratti* is a non-destructive method of  
399 sampling parasite genetic diversity, and the hope must be that these approaches are now  
400 expanded to other parasitic nematodes. Such analyses will likely uncover different patterns  
401 of population genetic variation in other species, and understanding this will more fully  
402 illuminate the interactions between parasites and hosts, and so underpin a better  
403 understanding of the rich ecology of parasites.

## 404 **Materials and Methods**

405

### 406 **Parasite and rat sampling**

407 We sampled at three sites in the southern UK – Avonmouth (AV), Cardiff (CA) and Long  
408 Ashton (LA) (**Supplementary Table 10, Figure 1**), collecting fresh rat faecal pellets, which  
409 were cultured at 19°C and visually inspected for *S. ratti* infective third stage larvae (Viney  
410 and Lok, 2007), which were washed twice in distilled water, once in 1 % w/v SDS, and then  
411 twice more in distilled water, before being stored at -80°C. We genotyped rat faecal pellets  
412 at 9 dinucleotide repeat microsatellite loci (**Supplementary Table 2**) that had previously  
413 been used with wild rats (Desvars-Larrive *et al.*, 2017; Giraudeau *et al.*, 1999; Gardner-  
414 Santana *et al.*, 2009; Steen *et al.*, 1999), preparing DNA using the QIAamp DNA Stool Mini  
415 Kit (Qiagen) (Cole, 2020).

416

### 417 ***S. ratti* genotyping**

418 Of the more than 10,000 *S. ratti* larvae that we isolated from wild rats, we had to select a  
419 sub-sample for whole genome sequencing. We did this mindful that *S. ratti* parasitic stages  
420 reproduce by mitotic parthenogenesis (Viney, 1994), such that in pellets containing more  
421 than one larva, that those larvae may be genetically identical siblings. Alternatively, a rat  
422 may be infected with multiple genotypes of *S. ratti* in which case there will also be a  
423 genetically different larvae in individual faecal pellets. We used RFLP genotyping to initially  
424 assess the genetic diversity among larvae within individual faecal pellets (Cole 2020). This  
425 showed that *S. ratti* infrapopulations are typically composed of multiple, genetically distinct  
426 parasitic adults and so we concluded that whole genome sequencing of multiple infective  
427 larvae from the same faecal pellet was unlikely to result in extensive resequencing of  
428 genetically identical siblings, and as such would be informative both for measuring the  
429 genetic diversity within sampling sites as a whole, and for assessing the extent of genetic  
430 variation within infrapopulations (Cole 2020)

431

432 For whole genome sequencing larvae were lysed and DNA quantified (Cole 2020). Samples  
433 were quantified with Biotium Accuclear Ultra high sensitivity dsDNA Quantitative kits using  
434 Mosquito LV liquid platform, Bravo WS and BMG FLUOstar Omega plate reader and  
435 cherry-picked to 200 ng / 120 µL using a Tecan liquid handling platform. Cherry-picked plates  
436 were sheared to 450 bp using a Covaris LE220 instrument and post-sheared samples  
437 purified using Agencourt AMPure XP SPRI beads on Agilent Bravo WSLibraries were  
438 constructed using the NEB Ultra II custom kit on an Agilent Bravo WS automation system.  
439 PCRs were set-up using KapaHiFi Hot start mix and IDT 96 iPCR tag barcodes on an Agilent  
440 Bravo WS automation system, and then purified using Agencourt AMPure XP SPRI beads  
441 on Beckman BioMek NX96 liquid handling platform. Libraries were quantified with Biotium  
442 Accuclear Ultra high sensitivity dsDNA Quantitative kit using Mosquito LV liquid handling  
443 platform, Bravo WS and BMG FLUOstar Omega plate reader. Libraries were pooled in  
444 equimolar amounts on a Beckman BioMek NX-8 liquid handling platform and libraries  
445 normalised to 2.8 nM ready for cluster generation on a c-BOT and loading on the Illumina X  
446 Ten platform. Sequencing reads from the libraries were aligned to the *S. ratti* reference  
447 assembly version 5\_0\_4 (Hunt *et al.* 2016, taken from WormBase ParaSite release WBPS7)  
448 using Bowtie 2 version 2.2.9 (Langmead and Salzberg, 2012) with default settings. We  
449 initially whole genome sequenced 225 *S. ratti* infective larvae at low depth of coverage and

450 calculated the proportion of reads that aligned to the *S. rattii* genome, and used this metric  
451 to choose 90 libraries for further deep sequencing.

452

### 453 **Sequence analysis**

454 We used BCFtools (Li 2011) to identify SNPs using the criteria that they (i) fell on a  
455 nucleotide covered by at least 1,000 reads (cumulative across all samples), (ii) had a mean  
456 mapping quality of at least 20, and (iii) had a QUAL score of at least 50. Among the 90 *S.*  
457 *rattii* genome sequences, nucleotides that were identical among all samples (but different  
458 from the ED321 reference genome) were removed. We sequenced to an average coverage  
459 of 96 % of nucleotides (range 75.8-99.3 %), and an average read depth of 68 (range 20-  
460 246; just 5 larvae had mean read depths of less than 30).

461

462 We noticed that the mean read depth on the X chromosome was 67.9 % of the mean read  
463 depth on the two autosomes. We concluded that this was due to the GC content because  
464 (i) there was a significant correlation between read depth and GC content (**Supplementary**  
465 **Figure 16**) and (ii) that the X chromosome has a slightly lower GC content (19.7 %)  
466 compared with the autosomes (22 %) (Hunt *et al.*, 2016).

467

468 Basic genetic diversity and population genetic statistics were calculated using VCFtools  
469 version 0.1.12 (Danecek *et al.*, 2011). Hardy-Weinberg equilibrium (HWE) was calculated  
470 considering only biallelic SNPs.  $\Phi$  relatedness values (Manichaikul *et al.*, 2010) of each pair  
471 of larvae were calculated using VCFtools and we used t-tests to compare  $\Phi$  values. We also  
472 measured the differentiation among sites using the fixation index,  $F_{ST}$ .

473

474 We generated neighbour-joining dendrograms using TASSEL 5.0 (Bradbury *et al.*, 2007),  
475 and visualised in FigTree Version 1.4.3. Clades within the neighbour-joining trees were  
476 identified by eye. Fisher's exact tests, performed in R, were used to determine whether there  
477 were significant differences in the frequencies of these clades among sampling sites or  
478 sampling seasons.

479

480 We constructed maximum likelihood trees of the 90 parasites, producing consensus fasta  
481 sequences for each individual, but where an individual was heterozygous the reference  
482 allele was applied, with sequences aligned with MAFFT version 7 (Katoh *et al.* 2009) using  
483 strategy FF-NST-1 for fast alignment, and maximum likelihood tree estimation performed  
484 using RaxML version 8.1.15 (Stamatakis 2006), using the general time reversible gamma  
485 model of substitution rate heterogeneity, and rapid bootstrapping with 100 replicates was  
486 applied. We generated separate maximum likelihood trees for chromosome 1, the first 80  
487 Mb of chromosome 2, the remainder of chromosome 2 and the two largest contigs of the X  
488 chromosome.

489

490 We conducted Principal Component Analysis using the R package pcadapt version 4.1.0  
491 (Luu *et al.* 2017) using only loci with a minor allele frequency greater than 0.05. We  
492 investigated the admixture among the 90 parasite genotypes using ADMIXTURE version  
493 1.3.0 (Alexander and Lange 2011). Due to computational constraints, for the 90 parasites  
494 SNP data were first thinned so that no two SNPs were within 500 bp of each other, leaving  
495 a dataset of 35,559 SNPs. ADMIXTURE was run separately for k values 2-15.

496

497 We measured linkage disequilibrium (LD) among the 90 samples for the two autosomes and  
498 the two largest X chromosome scaffolds. We initially phased the genotype data into  
499 haplotypes using Beagle version 5.0 (Browning and Browning, 2007; Browning *et al.*, 2018),  
500 where we used 100 burn-in iterations to generate an initial estimate of haplotype frequency,  
501 and a further 100 iterations were used to estimate genotype phase for each SNP in each  
502 sample. Phasing is influenced by the effective population size ( $N_e$ ), which isn't known for *S.*  
503 *ratti*, but we estimated this as 50,000; otherwise, default Beagle parameters were used. We  
504 also undertook phasing using Shapeit version 2-r900 (O'Connell *et al.* 2014), where we used  
505 100 burn-in iterations, 100 phasing iterations, and an estimated  $N_e$  of 50,000. For both we  
506 used a window size of 0.5 Mb to estimate haplotypes. Only biallelic loci were used in Shapeit,  
507 but triallelic loci were also included in Beagle. We report the results from phasing using  
508 Beagle; Shapeit gave similar results.

509

510 To reduce computational time during linkage decay analysis, phased VCF files were thinned  
511 so that no two remaining loci were within 100 bp of one another. To perform linkage decay  
512 analysis, VCFTools was used to compare each SNP to each other SNP within a 50 kb  
513 window of it, with Pearson's coefficient of correlation,  $r^2$ , calculated for each pair. To  
514 measure LD across the whole genome we further thinned the phased data so that no two  
515 SNPs were within 500 bp of each other, when the analysis was repeated as above, except  
516 that this time each SNP was compared to every other SNP in the entire genome. We also  
517 repeated these analyses for sub-sets of parasites within the clades that we identified.

518

519 We also analysed the mitochondrial genomes (excluding one individual from site AM due to  
520 unexpectedly low mitochondrial read depth), and used Analysis of Molecular Variance  
521 (AMOVA) which was conducted in GenAlEx version 6.5 (Peakall and Smouse 2006, 2012).  
522 Haplotype maps were generated in PopART version 1.7 (Leigh and Bryant 2015) using the  
523 minimum spanning network method (Bandelt *et al.* 1999), and maximum likelihood trees  
524 based on unique haplotypes were generated with RaxML version 8.1.15 (Stamatakis 2006),  
525 using the general time reversible gamma model of substitution rate heterogeneity, and rapid  
526 bootstrapping with 100 replicates was applied. We calculated the proportion of SNPs (you  
527 say "alleles") shared among all pairs or worms and compared this to the nuclear  $\Phi$   
528 relatedness using a Mantel test.

529

530 We also used whole genome sequence data of 10 isofemale lines derived from wild *S. ratti*  
531 (**Supplementary Table 4**), which we obtained from the European Variant Archive, study  
532 code PRJEB41 <https://www.ebi.ac.uk/ena/data/view/PRJEB4163>. Among the 90 wild *S. ratti*  
533 and 10 isofemale lines, there were 235,393 SNPs of which 928 were tri-allelic, the remainder  
534 bi-allelic, with a ratio of 1.8 of transitions to transversions.

535

### 536 **Rat population genetic analysis**

537 We only used data for faecal pellets that were successful genotyped at 6 or more loci,  
538 resulting in 132 genotyped faecal pellets. Locus D12Rat42 was excluded from further  
539 population genetic analyses due to the low number of rats successfully genotyped at this  
540 locus. We used GenAlEx's (version 6.5; Peakall and Smouse 2006, 2012) pairwise  
541 relatedness function) to detect pellets with identical multi-locus genotypes, which we took to

542 have come from the same individual rat. We calculated Ritland and Lynch pairwise  
543 relatedness (Lynch and Ritland 1999), where each individual was compared with each other  
544 individual, and doubled these values to give a possible range of -1 to 1 from which we  
545 calculated the mean within-sample-site and mean among-sample-site relatedness. We  
546 determined the log-likelihood of the rat originating from each sampling site using GenAIE  
547 to assign pellet genotypes to each sample site by comparing the multilocus genotype of  
548 each rat with the allele frequencies of each of the sampling sites (excluding the rat currently  
549 being investigated).

550

551 We used Shannon's mutual information index ( $S_{H_{UA}}$ ) to quantify the differences in allele  
552 frequencies among sampling sites and to estimate the number of effective migrants per  
553 generation.  $S_{H_{UA}}$  measures and is valid despite deviations from HWE within subpopulations  
554 (Hedrick, 2005; Sherwin *et al.*, 2006).  $S_{H_{UA}}$  ranges from 0 (indicating unhindered gene flow)  
555 to 1 (indicating a complete lack of gene flow).

556

557 We ensured (beyond visual identification) that none of the faecal pellets that we had  
558 genotyped were from species other than *R. norvegicus* by seeking to amplify the nine rat  
559 microsatellite loci from DNA isolated from other species that may potentially produce  
560 contaminating faecal material, specifically that from black rats (*R. rattus*), moles (*Talpa*  
561 *europaea*), and squirrels (*Sciurus carolinensis*). With one exception, none of these  
562 microsatellite loci successfully amplified from these species (the exception was locus  
563 D12Rat42 that did amplify *R. rattus* DNA) confirming that all successful genotypes were  
564 from *R. norvegicus*. As positive controls we used primer pairs (i) Scv1 previously used to  
565 amplify *Sciurus* sp. DNA (Hale *et al.*, 2001), which successfully amplified our *Sciurus* sp. DNA,  
566 and weakly amplified *R. norvegicus* DNA, and (ii) RodActin previously used to amplify *R.*  
567 *rattus* DNA (Apte *et al.*, 2007), which successfully amplified our *R. rattus* and *R. norvegicus*  
568 DNA.

569

### 570 **Parasitism and free-living genes and expansion clusters**

571 We followed previous work that identified "parasitism genes" (Hunt *et al.*, 2016). We  
572 excluded parasitism genes if they were part of an expansion cluster (below) and the  
573 underlying genome assembly was poor. We calculated 95% confidence intervals for  
574 percentages from [www.sample-size.net](http://www.sample-size.net).

575

576 We define an "expansion cluster" as a genomic region containing four or more genes coding  
577 for members of one of three protein families (astacin-like metallopeptidases, CAP domain-  
578 containing proteins, or acetylcholinesterases), where there is not more than one other gene  
579 between any two genes of those families. This definition differs somewhat from, and is more  
580 conservative than that used by (Hunt *et al.*, 2016). As controls we used "flanking regions",  
581 which we define as the genomic region directly adjacent to the expansion cluster that is the  
582 same size as the cluster itself. Each expansion cluster has two flanking regions.

583

584 Lists of genes belonging to these three gene families were collated from Hunt *et al.*, 2016  
585 and from this we initially identified 15 expansion clusters. Because clusters 10 and 11 were  
586 very close to each other, cluster 10's right flanking region was shortened to end where  
587 expansion cluster 11 began, and expansion cluster 11 was considered to not have a left

588 flanking region. Similarly, to avoid overlap of cluster 11's right flanking region and cluster  
589 12's left flanking region we shortened cluster 12's left flanking region to the start of cluster  
590 11's right flanking region. Across all expansion clusters there were 135 genes in total, of  
591 which 126 belonged to one of the three gene families: 46 encoding CAP domain-containing  
592 proteins, 70 encoding astacin-like metallopeptidases, and 10 encoding  
593 acetylcholinesterases, representing 51.7%, 38% and 33.3% of CAP domain-containing  
594 proteins, astacin-like metallopeptidase and acetylcholinesterase encoding genes in the  
595 genome as a whole. Flanking regions collectively contained 216 protein-coding genes the  
596 products of which had varying predicted functional descriptions.

597

598 Mindful that these expansion cluster regions were repetitive in nature we checked their  
599 original reference genome assembly by realigning the sequencing reads originally used to  
600 build the reference assembly back to the reference, available at NCBI, BioProject code  
601 PRJEB2398, and then assessed the quality of these alignments using Gap5 (Bonfield and  
602 Whitman 2010). Repetitiveness of the sequence was examined *via* Dotplots with the  
603 software package Dotter (Sonnhammer and Durbin, 1995). Gene annotation schematics  
604 were retrieved from Ensembl's 'Region in Detail' tool (Hubbard *et al.*, 2002), accessed via  
605 WormBase Parasite (Howe *et al.*, 2017) version 12  
606 (<https://parasite.wormbase.org/index.html>) and added to the graphics produced by Gap5.  
607 Regions with poor mapping quality, unusually large distances between mate pairs and the  
608 occurrence of mate pairs facing opposite directions are suggestive of high rates of sequence  
609 misalignment. Peaks in read depth and fragment depth above background levels were  
610 evidence that multiple copies of a repetitive sequence were collapsed in the reference  
611 assemblies. Where expansion cluster genes or genes in flanking regions fell in poorly  
612 resolved reference assembly areas, these genes were excluded from further analysis.

613

614 Using this approach, we excluded expansion clusters 4, 11 and 13, and their flanking regions  
615 entirely and other genes within various clusters, resulting in 196 genes remaining, of which  
616 61 were in expansion clusters and 135 were in flanking regions (**Supplementary Table 8**).  
617 Expansion clusters 6, 7, 8, 12 and 14 had no genes excluded. Three expansion clusters had  
618 genes that did not belong to one of the three target gene families, and were excluded from  
619 analyses. Of the remaining 58 in the expansion cluster genes, 29 encoded CAP domain-  
620 containing proteins, 27 encoded astacin-like metallopeptidases, and 2 encoded  
621 acetylcholinesterases.

622

### 623 **Data Deposition**

624 The genome data of the 90 larvae are deposited in the European Variation Archive, study  
625 PRJEB32744, <https://www.omicsdi.org/dataset/eva/PRJEB32744>.



626 **Acknowledgements**

627

628 We would like to thank the land owners for access to the sample sites; Benito Wainwright,  
629 Amy Williams Schwartz, and Bristol Zoo Gardens for the provision of mammalian tissue;  
630 and Vicky Hunt for helpful discussions. RC was funded by a NERC studentship. The  
631 sequence data for this project were produced by the Wellcome Sanger Institute with funding  
632 from the Wellcome Trust, grant 206194.

633 **References**

634

635 Alexander D. H. and Large K. (2011) Enhancements to the ADMIXTURE algorithm for  
636 individual ancestry estimation. *BMC Bioinformatics* **12**:246.

637

638 Apte U., Thompson M. D., Cui S., Liu B., Cieply B. and Monga S. P. S. (2007). Wnt/ $\beta$ -catenin  
639 signaling mediates oval cell response in rodents. *Hepatology* **47**:288-295.

640

641 Bandelt H., Forster P. and Röhl A. (1999). Median-joining networks for inferring intraspecific  
642 phylogenies. *Molecular Biology and Evolution* **16**:37-48.

643

644 Blouin M.S., Yowell C.A., Courtney, C.H. and Dame, J.B. (1995). Host movement and the  
645 genetic structure of populations of parasitic nematodes. *Genetics* **141**:1007-1014.

646

647 Bonfield J.K. and Whitwham, A. (2010). Gap5 - editing the billion fragment sequence  
648 assembly. *Bioinformatics* **26**:1699-1703.

649

650 Bradbury P. J., Zhang Z., Kroon D. E., Casstevens T. M., Ramdoss Y. and Buckler E. S.  
651 (2007). TASSEL: Software for association mapping of complex traits in diverse samples.  
652 *Bioinformatics* **23**:2633-2635.

653

654 Browning S. R. and Browning B. L. (2007). Rapid and accurate haplotype phasing and  
655 missing data inference for whole genome association studies by use of localized haplotype  
656 clustering. *American Journal of Human Genetics* **81**:1084-1097.

657

658 Browning B. L., Zhou Y. and Browning S. R. (2018). A one-penny imputed genome from  
659 next generation reference panels. *American Journal of Human Genetics* **103**:338-348.

660

661 Cole, R.L. (2020). The distribution of genetic diversity within and among the *Strongyloides*  
662 *ratti* genome. PhD thesis, University of Bristol, UK. [https://research-](https://research-information.bris.ac.uk/en/studentTheses/the-distribution-of-genetic-diversity-within-and-among-the-strong)  
663 [information.bris.ac.uk/en/studentTheses/the-distribution-of-genetic-diversity-within-and-](https://research-information.bris.ac.uk/en/studentTheses/the-distribution-of-genetic-diversity-within-and-among-the-strong)  
664 [among-the-strong](https://research-information.bris.ac.uk/en/studentTheses/the-distribution-of-genetic-diversity-within-and-among-the-strong)

665

666 Cole R. and Viney M. (2018). The population genetics of parasitic nematodes of wild  
667 animals. *Parasites and Vectors* **11**:590.

668

669 Combs M., Puckett E. E., Richardson J., Mims D. and Munshi-South J. (2017). Spatial  
670 population genomics of the brown rat (*Rattus norvegicus*) in New York City. *Molecular*  
671 *Ecology* **27**:83-98.

672

673 Criscione, C.D., Anderson, J.D., Sudimack, D., Peng, W., Jha, B., Willilams-Blangero, S.  
674 and Anderson T.J.C. (2007) Disentangling hybridization and host colonization in parasitic  
675 roundworms of humans and pigs. *Proceedings of the Royal Society B* **274**:2669-2677.

676

677 Danecek P., Auton A., Abecasis G., Albers C. A., Banks E., DePristo M. *et al.* (2011). The  
678 variant call format and VCFtools. *Bioinformatics* **27**:2156-2158.

679

680 Desvars-Larrive A., Pascal M., Gasqui P., Cosson J.-F., Benoit E., Lattard V., Crespín L. *et*  
681 *al.* (2017). Population genetics, community of parasites, and resistance to rodenticides in  
682 an urban brown rat (*Rattus norvegicus*) population. *PLoS One* **12**:e0184015.

683

684

- 685 Durrant, C., Thiele, E.A., Holroyd, N., Doyle, S.R., Sallé, G., Tracey, A., *et al.* (2020).  
686 Population genomic evidence that human and animal infections in Africa come from the  
687 same populations of *Dracunculus medinensis*. *PLoS Neglected Tropical Diseases*  
688 **14**:e0008623.
- 689  
690 Fisher M.C. and Viney M.E. (1998) The population genetic structure of the facultatively  
691 sexual parasitic nematode *Strongyloides ratti* in wild rats. *Proceedings of the Royal Society*  
692 *of London Series B* **265**:703-709.
- 693  
694 Gardner-Santana L. C., Norris D. E., Fornadel C. E., Hinson E. R., Klein S. L. and Glass  
695 G.E. (2009). Commensal ecology, urban landscapes, and their influence on the genetic  
696 characteristics of city-dwelling Norway rats (*Rattus norvegicus*). *Molecular Ecology*.  
697 **18**:2766–2778.
- 698  
699 Giraudeau F., Apiou F., Amarger V., Kaisaki P. J., Bihoreau M.-T., Lathrop M. *et al.* (1999).  
700 Linkage and physical mapping of rat microsatellites derived from minisatellite loci.  
701 *Mammalian Genome* **10**:405-409.
- 702  
703 Greischar M. and Koskella B. (2007). A synthesis of experimental work on parasite local  
704 adaptation. *Ecology Letters* **10**:418-433.
- 705  
706 Hale M. L., Bevan R. and Wolff K. (2001). New polymorphic microsatellite markers for the  
707 red squirrel (*Sciurus vulgaris*) and their applicability to the grey squirrel (*S. carolinensis*).  
708 *Molecular Ecology Resources* **1**:47-49.
- 709  
710 Harvey S.C., Gemmill A.W., Read A.F. and Viney M.E. (2000). The control of morph  
711 development in the parasitic nematode *Strongyloides ratti*. *Proceedings of the Royal Society*  
712 *of London Series B* **267**:2057-2063.
- 713  
714 Hedrick P. W. (2005). A standardized genetic differentiation measure. *Evolution* **59**:1633-  
715 1638.
- 716  
717 Howe K. L., Bolt B. J., Shafie M., Kersey P and Berriman M. (2017). WormBase ParaSite –  
718 a comprehensive resource for helminth genomics. *Molecular and Biochemical Parasitology*  
719 **215**:2-10.
- 720  
721 Hubbard T., Barker D., Birney E., Cameron G., Chen Y., Clark L. *et al.* (2002). The Ensembl  
722 genome database project. *Nucleic Acids Research* **30**:38-41.
- 723  
724 Hunt V.L., Asai I.J., Coghlan A., Reid A.J., Holroyd N., Foth B.J., *et al.* (2016). The genomic  
725 basis of parasitism in the *Strongyloides* clade of nematodes. *Nature Genetics* **48**: 299-307.
- 726  
727 Jaleta, T.G., Zhou, S., Bemm, F.M., Schär, F., Khieu, V., Muth, S. *et al.* (2017) Different but  
728 overlapping populations of *Strongyloides stercoralis* in dogs and humans – Dogs as a  
729 possible source for zoonotic strongyloidiasis. *PLoS Neglected Tropical Diseases*  
730 **11**:e0005752.
- 731  
732 Jost L., Archer F., Flanagan S., Gaggiotti O., Hoban S and Latch E. (2018). Differentiation  
733 measures for conservation genetics. *Evolutionary Applications* **11**:1139-1148.
- 734  
735 Katoh K., Asimenos G. and Toh H. (2009). Multiple alignment of DNA sequences with  
736 MAFFT. *Methods in Molecular Biology* **537**:39-64.

737

738 Kuris, A.M., Hechinger, R.F., Shaw, J.C., Whitney, K.L., Aguirre-Macedo, L. *et al.* (2008).  
739 Ecosystem energetic implications of parasite free-living biomass in three estuaries. *Nature*  
740 **454**:515-518.

741

742 Lafferty, K.D., Dobson, A.P. and Kuris, A.M. (2005) Lafferty, K.D., Dobson, A.P. and Kuris,  
743 A.M. (2008) Parasites dominate food web links. *Proceedings of the National Academy of*  
744 *Sciences* **103**:11211-11216.

745

746 Langmead B. and Salzberg S. (2012). Fast gapped-read alignment with Bowtie 2. *Nature*  
747 *Methods* **9**:357-359.

748

749 Lee, D., Zdraljevic, S., Stevens, L., Wang, Y., Tanny, R.E., Crombie, T.A., *et al.* (2021).  
750 Balancing selection maintains hyper-divergent haplotypes in *Caenorhabditis elegans*.  
751 *Nature Ecology and Evolution* <https://doi.org/10.1038/s41559-021-01435-x>

752

753 Leigh JW and Bryant D. (2015). PopART: Full-feature software for haplotype network  
754 construction. *Methods in Ecology and Evolution* **6**:1110-1116.

755

756 Li H. (2011). A statistical framework for SNP calling, mutation discovery, association  
757 mapping and population genetical parameter estimation from sequencing data.  
758 *Bioinformatics* **27**:2987- 2993.

759

760 Lively CM., Dybdahl MF., Jokela J., Osnas EE. and Delph LF. (2004) Host sex and local  
761 adaptation by parasites in a snail-trematode interaction. *American Naturalist* **164**:S6-S18.

762

763 Luu K., Bazin E. and Blum M. G. (2017). pcadapt: an R package to perform genome scans  
764 for selection based on principal component analysis. *Molecular Ecology Resources* **17**:67-  
765 77.

766

767 Lynch M. and Ritland K. (1999). Estimation of pairwise relatedness with molecular markers.  
768 *Genetics* **152**:1753-1766.

769

770 Manichaikul A., Mychaleckyj J. C., Rich S. S., Daly K., Sale M., Chen W. M. (2010). Robust  
771 relationship inference in genome-wide association studies. *Bioinformatics* **26**:2867-28773.

772

773 Noble, L.M., Yuen, J., Stevens, L., Moya, N., Persaud, R., Moscatelli, M., *et al.* (2021).  
774 Selfing is the safest sex for *Caenorhabditis tropicalis*. *eLife* **10**:e62587.

775

776 O'Connell J., Gurdasani D., Delaneau O., Pirastu N., Ulivi S., Cocca M. *et al.* (2014). A  
777 general approach for haplotype phasing across the full spectrum of relatedness. *PLoS*  
778 *Genetics* **10**:e1004234.

779

780 Peakall R. and Smouse P. E. (2006). GENALEX 6: genetic analysis in Excel. Population  
781 genetic software for teaching and research. *Molecular Ecology Notes* **6**:288-295.

782

783 Peakall R. and Smouse P. E. (2012). GenAIEx 6.5: genetic analysis in Excel. Population  
784 genetic software for teaching and research-an update. *Bioinformatics* **28**:2537-2539.

785

786 Redman, E., Whitelaw, F., Tait, A., Burgess, C., Bartley, Y., Skuce, P.J., Jackson, F. and  
787 Gilleard J. (2015). The emergence of resistance to the benzimidazole anthelmintics in

- 788 parasitic nematodes of livestock is characterised by multiple independent hard and soft  
789 selective sweeps. *PLoS Neglected Tropical Diseases*, **9**:e0003494  
790
- 791 Sallé G., Doyle S. R., Cortet J., Cabaret J., Berriman M, Holyroyd N. *et al.* (2019). The global  
792 diversity of *Haemonchus contortus* is shaped by human intervention and climate. *Nature*  
793 *Communications* **10**:4811.  
794
- 795 Sherwin W. B., Jabot F., Rush R. and Rossetto M. (2006). Measurement of biological  
796 information with applications from genes to landscapes. *Molecular Ecology* **15**:2857-2869.  
797
- 798 Sonnhammer E.L.L and Durbin R. (1995). A dot-matrix program dynamic threshold control  
799 suited for genomic DNA and protein sequence analysis. *Gene* **167**:GC1-10.  
800
- 801 Stamatakis A. (2006). RAxML-VI-HPC: maximum likelihood-based phylogenetic analyses  
802 with thousands of taxa and mixed models. *Bioinformatics* **22**:2688-2690.  
803
- 804 Steen R. G., Kwitek-Black A. E., Glenn C., Gullings-Handley J., Van Etten W., Atkinson O.  
805 *et al.* (1999). A high-density integrated genetic linkage and radiation hybrid map of the  
806 laboratory rat. *Genome Resources* **9**:AP1-8.  
807
- 808 Thiele, E., Eberhard, M.L., Cotton, J.A., Durrant, C., Berg, J., Hamm, K. and Ruiz-Tiben, E.  
809 (2018). Population genetic analysis of Chadian Guinea worms reveals that human and non-  
810 human hosts share common parasite populations. *PLoS Neglected Tropical Diseases*,  
811 **12**:e006747.  
812
- 813 Viney M.E. and Lok J.B. (2007). *Strongyloides* spp. WormBook, ed. The *C. elegans*  
814 Research Community, *WormBook*, doi/10.1895/wormbook.1.7.1, <http://www.wormbook.org>  
815
- 816 Viney M.E. (1994). A genetic analysis of reproduction in *Strongyloides ratti*. *Parasitology*  
817 **109**:511-515.  
818
- 819 Viney M.E., Matthews B.E. and Walliker, D. (1992). On the biological and biochemical nature  
820 of cloned populations of *Strongyloides ratti*. *Journal of Helminthology* **66**:45-52.  
821
- 822 Viney M.E., Matthews B.E. and Walliker D. (1993). Mating in the parasitic nematode  
823 *Strongyloides ratti*: Proof of genetic exchange. *Proceedings of the Royal Society of London*  
824 *Series B* **254**:213-219.  
825
- 826 WHO (2021) [www.who.int/neglected\\_diseases/diseases/en/](http://www.who.int/neglected_diseases/diseases/en/)

827

## TABLES

828

829 **Table 1.  $F_{ST}$  and  $\Phi$  among *S. ratti* clades 1, 2 and 3.**

830

831

## FIGURES

832

833 **Figure 1. Map of sampling sites.** Showing site LA near Bristol, AM on the English coast of  
834 the Bristol Channel, and CA on the Welsh coast of the Bristol Channel. Road bridges  
835 crossing the channel are shown as dotted lines; a train tunnel is not shown.

836

837 **Figure 2. Physical and genetic differences among host and parasite populations.** A  
838 schematic view of (A) Geographical distance among the sample sites, where direct  
839 distances between the sites are AM-LA = 9.2 km, CA-AM = 31.5 km, CA-LA = 33.5 km. (B)  
840 average pairwise relatedness (shown as  $1-\Phi$ ) where  $\Phi$  AM-LA = 0.244, CA-AM = 0.157, CA-  
841 LA = 0.162, (C)  $F_{ST}$  among parasites, from the three sample sites where, AM-LA = 0, CA-AM  
842 = 0.03, CA-LA = 0.03 and (D)  $S_{H_{UA}}$  among rats where, AM-LA = 0.21, CA-AM = 0.22, CA-  
843 LA = 0.15. Note, the scales of the metrics varies among the panels

844

845 **Figure 3. *S. ratti* consists of distinct genetic clades that are widely distributed.** (A) A  
846 neighbour-joining dendrogram showing the five clades; (B) a maximum likelihood tree based  
847 on chromosome 1 where individuals are colour coded according to their clade membership  
848 in the neighbour-joining tree; chromosome specific trees are shown in **Supplementary**  
849 **Figure 4** (C) the admixture of the 90 larvae for  $K = 5$ , which is the most strongly supported  
850 value of  $K$ ; the order of individual worms and their neighbour-joining tree clade membership  
851 is shown in **Supplementary Figure 5**. Note, the colour coding in (C) does not correspond  
852 to (A) or (B).

853

854 **Figure 4. *S. ratti* genes involved in parasitism are highly diverse.** (A) The percentage  
855 of genes in high diversity regions ( $\geq 200$  SNPs per 10 kb), conserved regions ( $\leq 4$  SNPs per  
856 10 kb), or across the whole genome as a whole, that are parasitism or free-living genes.  
857 There were 100 genes in the variable regions, 137 in the conserved regions, and 12,464  
858 across the whole genome. Parasitism and free-living genes are as defined by Hunt *et al.*,  
859 2016. Error bars are 95 % confidence intervals. (B) The number of SNPs per kb (+1 SD) in  
860 parasitism genes (range 0-85.9), free-living genes (0-41.5) or across the genome as a  
861 whole. The SNP density for parasitism and free-living genes is calculated from coding  
862 sequence only; for the whole genome, all sequence data are used, and so no SD is given.  
863 (C) The density of SNPs of different effect in parasitism and free-living genes. (D) The  
864 density of SNPs of different effect in expansion clusters and flanking regions.

**Figure 1**

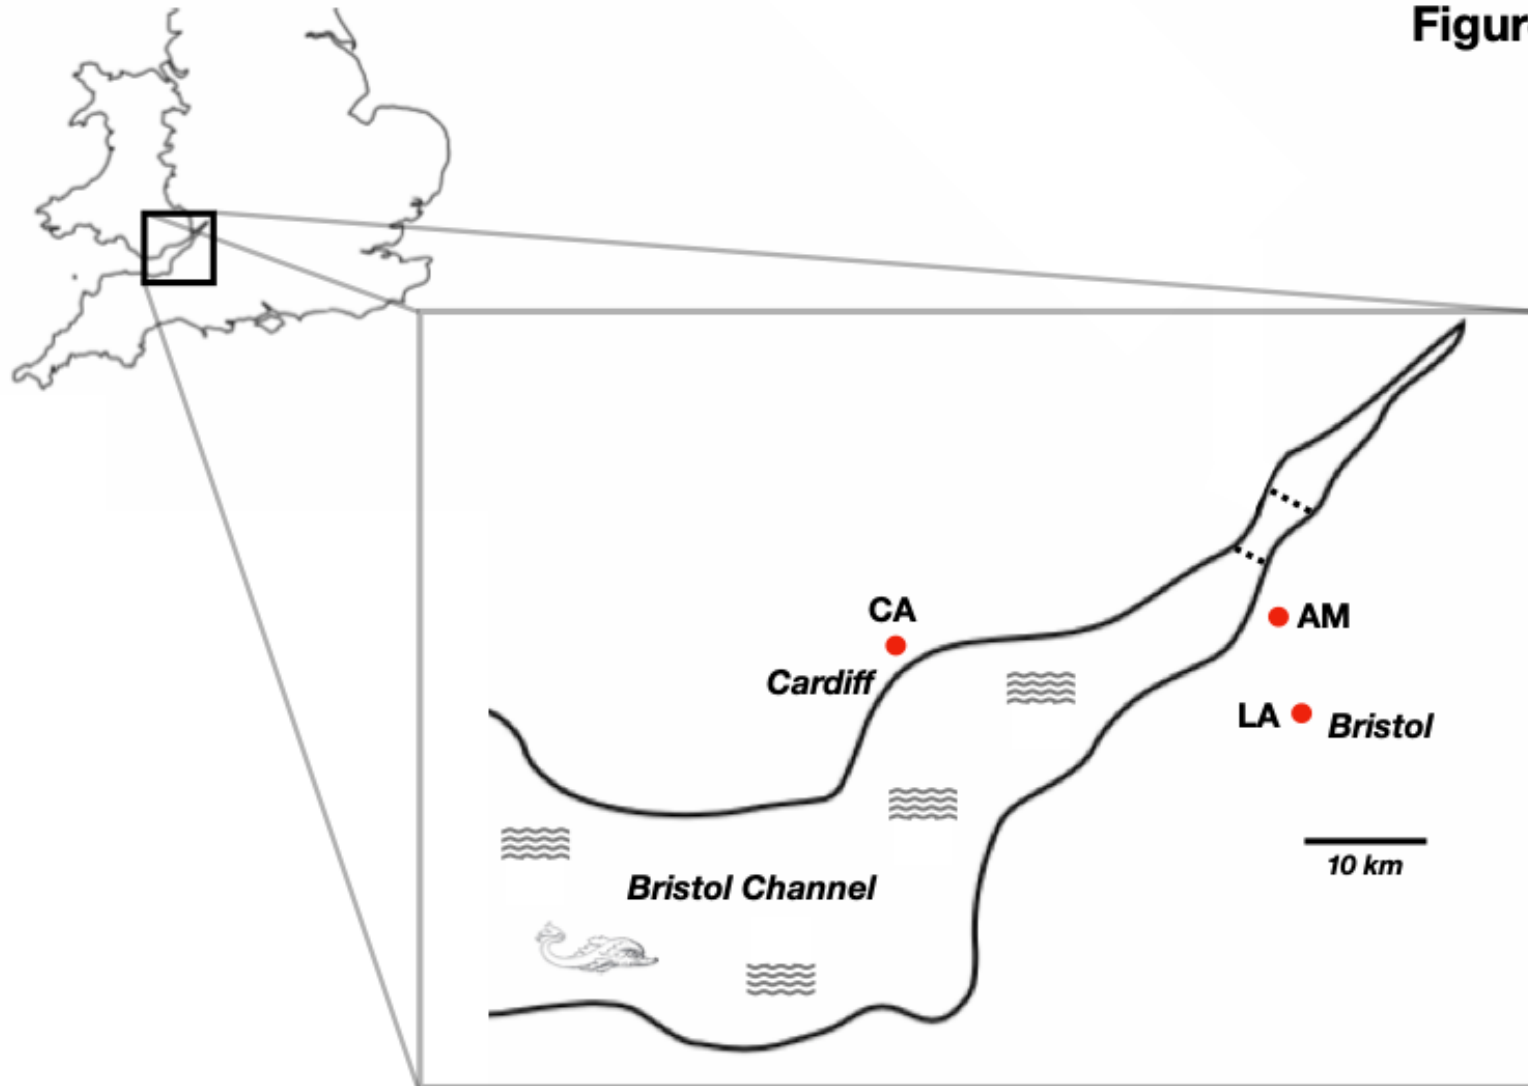

865  
866

**Figure 2**

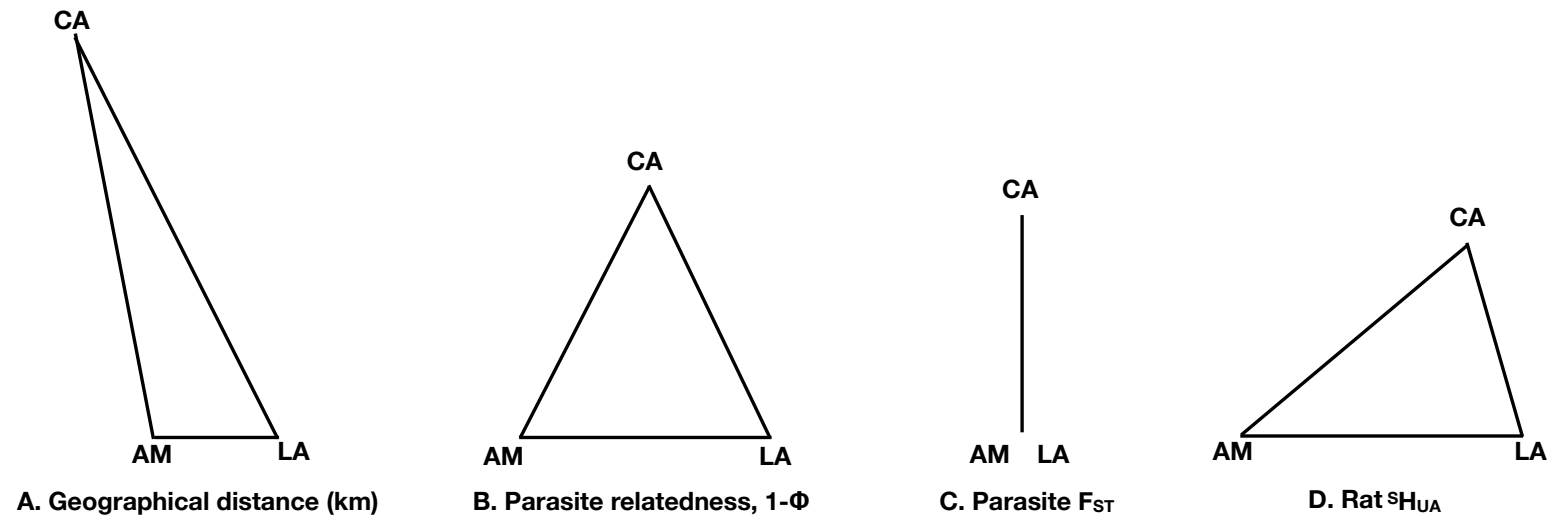



**Figure 3**

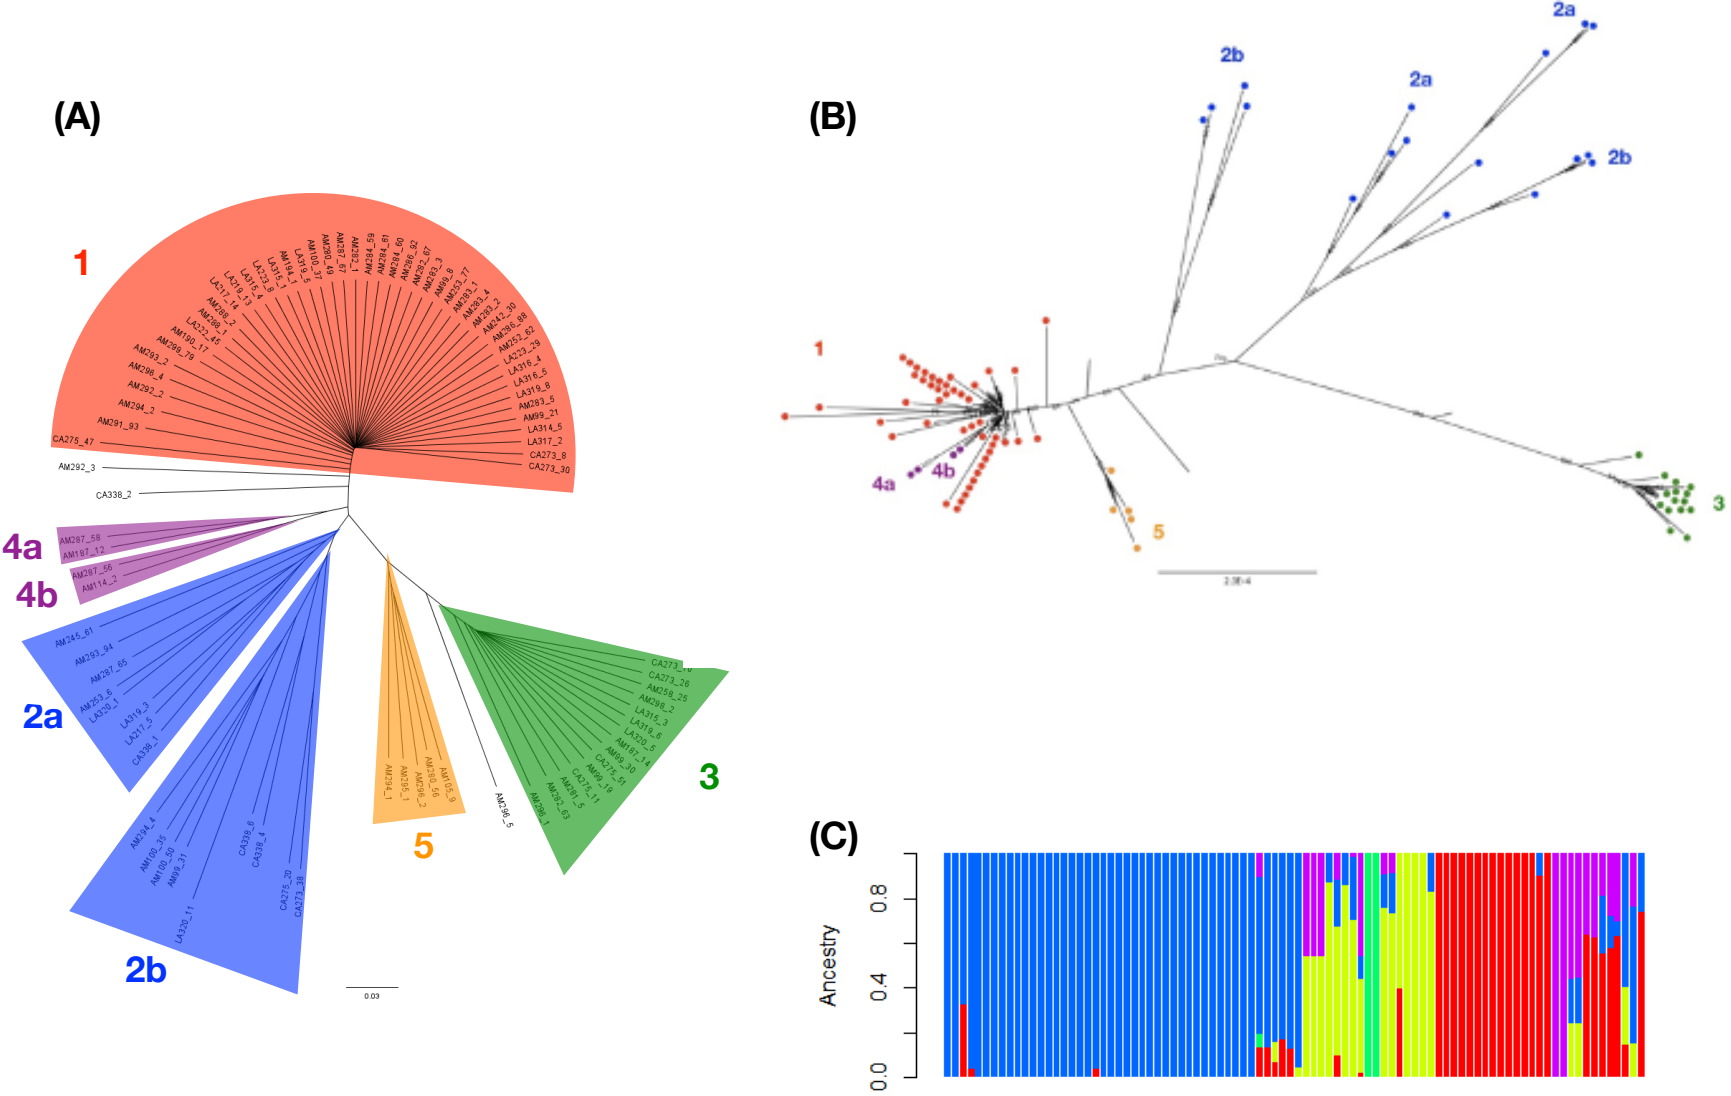

# Figure 4

(A)

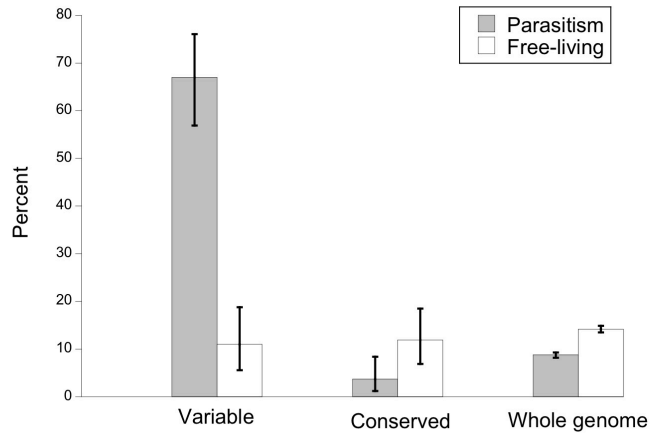

(B)

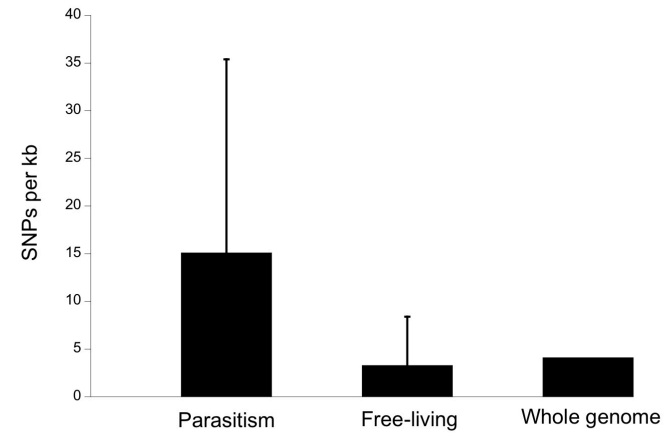

(C)

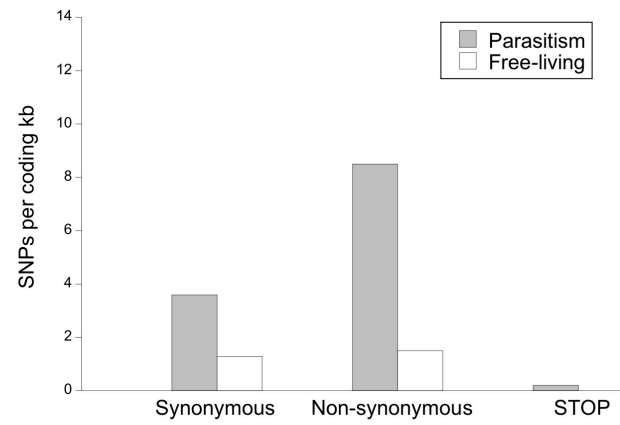

(D)

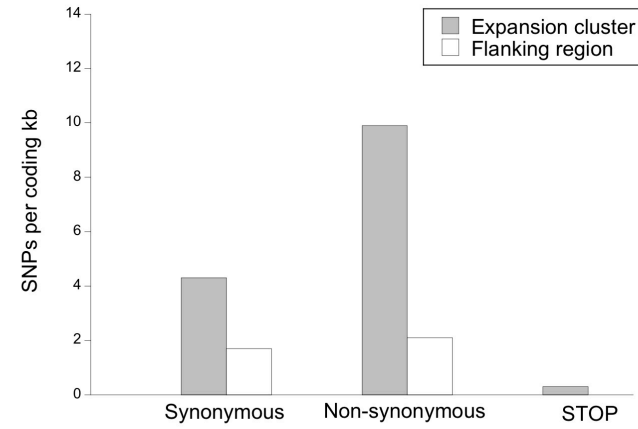

870 **Table 1.  $F_{ST}$  and  $\Phi$  among *S. rattii* clades 1, 2 and 3.** Pairwise  $F_{ST}$  is shown in italics above  
871 the diagonal, and  $\Phi$  on and below the diagonal in non-italic text.  
872

|                | <b>Clade 1</b> | <b>Clade 2</b> | <b>Clade 3</b> |
|----------------|----------------|----------------|----------------|
| <b>Clade 1</b> | 0.43           | <i>0.22</i>    | <i>0.35</i>    |
| <b>Clade 2</b> | 0.18           | 0.23           | <i>0.23</i>    |
| <b>Clade 3</b> | 0.06           | 0.05           | 0.45           |

873

874  
875  
876

## SUPPLEMENTARY INFORMATION

### 877 SUPPLEMENTARY TABLES

878

- 879 1. The occurrence of *S. rattii* in rat faecal pellets.
- 880 2. Rat microsatellite loci.
- 881 3. Population genetics of rat microsatellite loci.
- 882 4. Isofemale lines of *S. rattii* that were whole genome sequenced.
- 883 5. Genes in highly variable 10 kb regions.
- 884 6. The hundred most parasitic genes.
- 885 7. The hundred most free-living genes.
- 886 8. *S. rattii* expansion clusters, revised after further inspection of genome assembly in the  
887 cluster region.
- 888 9. dN/dS ratios of expansion clusters and their flanking regions.
- 889 10. Sampling sites and times.

890

891

### 892 SUPPLEMENTARY FIGURES

893

- 894 1. Frequency distribution of the number of *S. rattii* infective larvae isolated from infected  
895 rat faecal pellets.
- 896 2. Histogram of  $\Phi$  relatedness values among 90 *S. rattii* larvae.
- 897 3. The frequency distribution of the pairwise number of SNP differences among the 90  
898 parasites.
- 899 4. Maximum likelihood trees of the 90 parasites.
- 900 5. ADMIXTURE analysis of the 90 parasites.
- 901 6. PCA analysis of *S. rattii* parasites.
- 902 7. Minimum spanning *S. rattii* mitochondrial haplotype maps.
- 903 8. Ritland and Lynch pairwise relatedness values of rats within sampling sites.
- 904 9. *S. rattii* neighbour-joining dendrograms of 10 isofemale lines and 90 larvae collected  
905 from the three sample sites.
- 906 10. Linkage disequilibrium in the *S. rattii* genome.
- 907 11. Linkage disequilibrium in the *S. rattii* genome for clade 1 and 3 parasites.
- 908 12. Heatmaps of linkage disequilibrium in the *S. rattii* genome for clade 1 and 3 parasites.
- 909 13. Heatmaps of linkage disequilibrium in the *S. rattii* genome.
- 910 14. The distribution of SNPs across the *S. rattii* genome.
- 911 15. Neighbour-joining dendrograms based on five expansion clusters.
- 912 16. Correlation of read depth and GC content for 90 *S. rattii* larvae.

## SUPPLEMENTARY TABLES

914  
915  
916

**Supplementary Table 1. The occurrence of *S. rattii* in rat faecal pellets.** The proportion of infected pellets did not differ significantly among the seasons when the faecal pellets were collected ( $\chi^2 = 6$ ,  $df = 3$ ,  $P = 0.11$ ).

| Site and season        | Number of pellets collected | Number (and %) of infected pellets | Number of larvae collected | Mean (SD) number of larvae per infected pellet |
|------------------------|-----------------------------|------------------------------------|----------------------------|------------------------------------------------|
| CA, Spring             | 35                          | 7 (20%)                            | 244                        | 34.9 (24.3)                                    |
| CA, Summer             | 32                          | 5 (15.6%)                          | 89                         | 17.8 (22.1)                                    |
| CA, Autumn             | 19                          | 2 (10.5%)                          | 256                        | 128 (7.1)                                      |
| CA, Winter             | 26                          | 1 (3.8%)                           | 6                          | 6 (0)                                          |
| <b>CA, All seasons</b> | <b>112</b>                  | <b>15 (13.4%)</b>                  | <b>595</b>                 | <b>39.7 (42.1)</b>                             |
| AM, Spring             | 11                          | 8 (72.7%)                          | 137                        | 17.1 (23.5)                                    |
| AM, Summer             | 75                          | 23 (30.7%)                         | 428                        | 18.6 (29.3)                                    |
| AM, Autumn             | 27                          | 15 (55.6%)                         | 3,044                      | 202.9 (185)                                    |
| AM, Winter             | 21                          | 17 (81%)                           | 5,067                      | 298.1 (500.3)                                  |
| <b>AM, All seasons</b> | <b>134</b>                  | <b>63 (47%)</b>                    | <b>8,676</b>               | <b>137.7 (296.5)</b>                           |
| LA, Spring             | 27                          | 14 (51.9%)                         | 211                        | 15.1 (23.1)                                    |
| LA, Summer             | 11                          | 7 (63.6%)                          | 40                         | 5.7 (3.7)                                      |
| LA, Autumn             | 7                           | 6 (85.7%)                          | 360                        | 60 (46.8)                                      |
| LA, Winter             | 13                          | 9 (69.2%)                          | 589                        | 65.4 (83.8)                                    |
| <b>LA, All seasons</b> | <b>58</b>                   | <b>36 (62.1%)</b>                  | <b>1,200</b>               | <b>33.3 (52.8)</b>                             |
| All sites, Spring      | 73                          | 29 (39.7%)                         | 592                        | 20.4 (24.3)                                    |
| All sites, Summer      | 118                         | 35 (29.7%)                         | 557                        | 15.9 (25)                                      |
| All sites, Autumn      | 53                          | 23 (43.4%)                         | 3,660                      | 159.1 (162.4)                                  |
| All sites, Winter      | 60                          | 27 (45%)                           | 5,662                      | 209.7 (412.4)                                  |
| <b>Total</b>           | <b>304</b>                  | <b>114 (37.5%)</b>                 | <b>10,471</b>              | <b>91.9 (226.9)</b>                            |

917

918 **Supplementary Table 2. Rat microsatellite loci.** The forward primers are listed first and all primers are 5' to 3'; Length refers to the length  
 919 in bp of the region amplified by the given primer sequences as determined from Rnor 6.0 (1.7.2014) release of the *R. norvegicus* genome;  
 920 Fluorophore indicates the fluorophore used to label forward primers and thus PCR products  
 921

| Locus     | Primer sequences                                 | Length | Fluorophore | Reference                      |
|-----------|--------------------------------------------------|--------|-------------|--------------------------------|
| D3Rat159  | CCAGGGATGAGTCCAAGGTA<br>CTGGTCTGCTTCCTCCAGTC     | 243    | VIC         | Steen <i>et al.</i> , 1999     |
| D4Rat59   | GCAGTGTGTTTGGGGTAGCT<br>GCGGAATGATAGTTACTACGGC   | 180    | FAM         | Steen <i>et al.</i> , 1999.    |
| D6Cebr1   | GGTTTGGTTGGGGAGAA<br>GTGCTGTCAGGGAAAGATGTA       | 223    | NED         | Giraudeau <i>et al.</i> , 1999 |
| D8Rat162  | TCACTGGCAGCAATTTACCA<br>TCTGAGACCTCTTCAACTCTGTTG | 249    | VIC         | Steen <i>et al.</i> , 1999.    |
| D10Rat105 | ATCCAGCCAGAAAGCAAAAC<br>CTGGCTGAGTCCTGTCACAA     | 100    | FAM         | Steen <i>et al.</i> , 1999.    |
| D12Rat42  | CAACCCAGTGTGTCAAACGT<br>GGGTTGGTGAAGCATTTTCA     | 128    | VIC         | Steen <i>et al.</i> , 1999.    |
| D14Rat110 | AACATTGTCTTGCTTAGCCTCA<br>CTCCACCCACACACCACG     | 280    | NED         | Steen <i>et al.</i> , 1999.    |
| D18Rat11  | GCCCAGGAGCTAAGTCTGATT<br>CCAGCCTCAGAGCCAATAAG    | 133    | FAM         | Steen <i>et al.</i> , 1999.    |
| D19Rat62  | GTGCTAATGTGGGTGGCTTT<br>TGAATTCTACCATGCATCACAG   | 112    | NED         | Steen <i>et al.</i> , 1999.    |

922

923  
924  
925  
926  
927  
928  
929  
930  
931  
932  
933

**Supplementary Table 3. Population genetics of rat microsatellite loci. A. Genetic diversity of loci.** Rats genotyped is the number of individual rats in which genotyping was successful; Allele number is the number of alleles identified at the locus; He and Ho are expected and observed heterozygosity, respectively; Site diversity is the proportion of allelic diversity that partitions within sites, as opposed to among sites, according to  $^S H_{UA}$ . locus D12Rat42 was not used in analyses due to the low genotyping success rate. **B. HWE of loci.** Locus shows the loci; Site is the sampling site; Rats genotyped the number of rats that were genotyped; Alleles is the number of alleles detected,  $X^2$  is the statistic testing whether the observed genotype frequencies match HWE expectations with the degrees of freedom (df) in parentheses. Those still significant after Bonferroni correction are shown in bold.

934

| <b>A.</b>    |                       |                      |           |           |                           |
|--------------|-----------------------|----------------------|-----------|-----------|---------------------------|
| <b>Locus</b> | <b>Rats genotyped</b> | <b>Allele number</b> | <b>He</b> | <b>Ho</b> | <b>Site diversity (%)</b> |
| D3Rat159     | 103                   | 14                   | 0.779     | 0.756     | 18                        |
| D4Rat59      | 105                   | 12                   | 0.822     | 0.652     | 8                         |
| D6Cebr1      | 109                   | 14                   | 0.752     | 0.356     | 13                        |
| D8Rat162     | 73                    | 15                   | 0.835     | 0.600     | 16                        |
| D10Rat105    | 112                   | 8                    | 0.696     | 0.617     | 13                        |
| D12Rat42     | 34                    | 9                    | 0.762     | 0.267     | NA                        |
| D14Rat110    | 83                    | 16                   | 0.824     | 0.529     | 18                        |
| D18Rat11     | 112                   | 10                   | 0.686     | 0.319     | 19                        |
| D19Rat62     | 96                    | 12                   | 0.678     | 0.462     | 13                        |

| <b>B.</b>        |             |                       |                |                              |                    |
|------------------|-------------|-----------------------|----------------|------------------------------|--------------------|
| <b>Locus</b>     | <b>Site</b> | <b>Rats genotyped</b> | <b>Alleles</b> | <b><math>X^2</math> (df)</b> | <b>Probability</b> |
| <b>D3Rat159</b>  | CA          | 45                    | 7              | 41.8 (21)                    | 0.01               |
|                  | LA          | 17                    | 11             | 89.9 (55)                    | 0.01               |
|                  | <b>AM</b>   | <b>41</b>             | <b>10</b>      | <b>98.4 (45)</b>             | <b>0.001</b>       |
| <b>D4Rat59</b>   | <b>CA</b>   | <b>46</b>             | <b>9</b>       | <b>74.6 (36)</b>             | <b>0.001</b>       |
|                  | LA          | 15                    | 9              | 39.1 (36)                    | 0.03               |
|                  | AM          | 44                    | 10             | 67.2 (45)                    | 0.05               |
| <b>D6Cebr1</b>   | <b>CA</b>   | <b>45</b>             | <b>11</b>      | <b>100.7 (55)</b>            | <b>0.001</b>       |
|                  | <b>LA</b>   | <b>18</b>             | <b>10</b>      | <b>87.6 (45)</b>             | <b>0.001</b>       |
|                  | <b>AM</b>   | <b>46</b>             | <b>6</b>       | <b>105.1 (15)</b>            | <b>0.001</b>       |
| <b>D8Rat162</b>  | <b>CA</b>   | <b>25</b>             | <b>10</b>      | <b>120.1 (45)</b>            | <b>0.001</b>       |
|                  | LA          | 13                    | 8              | 28.3 (28)                    | 0.45               |
|                  | AM          | 35                    | 10             | 67.7 (45)                    | 0.05               |
| <b>D10Rat105</b> | <b>CA</b>   | <b>47</b>             | <b>5</b>       | <b>89.6 (10)</b>             | <b>0.001</b>       |
|                  | <b>LA</b>   | <b>19</b>             | <b>6</b>       | <b>64 (15)</b>               | <b>0.001</b>       |
|                  | <b>AM</b>   | <b>46</b>             | <b>7</b>       | <b>94.2 (21)</b>             | <b>0.001</b>       |
| <b>D12Rat42</b>  | <b>CA</b>   | <b>15</b>             | <b>9</b>       | <b>71.8 (36)</b>             | <b>0.001</b>       |
|                  | LA          | 5                     | 4              | 12 (6)                       | 0.06               |
|                  | AM          | 14                    | 6              | 33.1 (15)                    | 0.01               |
| <b>D14Rat110</b> | <b>CA</b>   | <b>34</b>             | <b>11</b>      | <b>112.4 (55)</b>            | <b>0.001</b>       |
|                  | LA          | 16                    | 9              | 45.2 (36)                    | 0.14               |
|                  | <b>AM</b>   | <b>33</b>             | <b>11</b>      | <b>113.6 (55)</b>            | <b>0.001</b>       |
| <b>D18Rat11</b>  | <b>CA</b>   | <b>47</b>             | <b>8</b>       | <b>66.6 (28)</b>             | <b>0.001</b>       |
|                  | <b>LA</b>   | <b>19</b>             | <b>5</b>       | <b>34.5 (10)</b>             | <b>0.001</b>       |
|                  | <b>AM</b>   | <b>46</b>             | <b>9</b>       | <b>141 (36)</b>              | <b>0.001</b>       |



|                 |           |           |          |                   |              |
|-----------------|-----------|-----------|----------|-------------------|--------------|
| <b>D19Rat62</b> | <b>CA</b> | <b>39</b> | <b>9</b> | <b>115.2 (36)</b> | <b>0.001</b> |
|                 | LA        | 17        | 7        | 40.8 (21)         | 0.01         |
|                 | AM        | 40        | 5        | 17.9 (10)         | 0.06         |

935

936

**Supplementary Table 4. Isofemale lines of *S. rattii* that were whole genome sequenced.**

937

| <b>Isofemale line</b> | <b>Isolation year</b> | <b>Origin</b>    |
|-----------------------|-----------------------|------------------|
| ED36                  | 1990                  | Hampshire, UK    |
| ED43                  | 1989                  | Edinburgh, UK    |
| ED53                  | 1990                  | Kagoshima, Japan |
| ED132                 | 1990                  | Kagoshima, Japan |
| ED336                 | 1995                  | Berkshire, UK    |
| ED391                 | 1989                  | Wiltshire, UK    |
| ED399                 | 1989                  | Sussex, UK       |
| ED405                 | 1989                  | Sussex, UK       |
| ED428                 | 2012                  | Bath, UK         |
| ED438                 | 2012                  | Bath, UK         |

938

939 **Supplementary Table 5. Genes in highly variable 10 kb regions.** Region lists the 61 regions (region 1 does not contain any genes);  
 940 Gene gives the gene's designation; Predicted function is the WormBase ParaSite description of each gene, where Astacin-like  
 941 metalloendopeptidase is abbreviated to Astacin; Coding SNPs per kb is the number of SNPs per kb within the coding sequence of that  
 942 gene; SNP type is the absolute number of synonymous (S), nonsynonymous (NS) and STOP codon-causing SNPs; Expression is taken  
 943 from Hunt *et al.*, 2016, which compared the expression of genes between the parasitic female and free-living female morph, and where the  
 944 expression is one log<sub>2</sub> fold more in the parasitic female morph (Parasitic), free-living female morph (Free-living), not different (Same), or  
 945 not listed (Unlisted); Expansion cluster is expansion cluster or associated flanking region a gene belongs to, if any. Some genes are marked  
 946 as "discarded" because they had poor underlying assembly according to Gap5 analysis of expansion clusters and flanking regions and so  
 947 were discounted from further analysis.  
 948

| Region | Gene            | Predicted function                                                         | Coding SNPs per kb | SNP type (S/NS/STOP) | Expression | Expansion cluster |
|--------|-----------------|----------------------------------------------------------------------------|--------------------|----------------------|------------|-------------------|
| 2      | SRAE_0000058700 | Kinesin, motor domain and P-loop-containing                                | 26.7               | 3 / 3 / 0            | Unlisted   | None              |
| 3      | SRAE_2000499400 | Hypothetical protein                                                       | 48.2               | 5 / 28 / 0           | Parasitic  | None              |
|        | SRAE_2000499500 | Hypothetical protein                                                       | 0                  | 0 / 0 / 0            | Parasitic  | None              |
|        | SRAE_2000499600 | Hypothetical protein                                                       | 72.2               | 8 / 20 / 1           | Parasitic  | None              |
|        | SRAE_2000499700 | Hypothetical protein                                                       | 45.7               | 5 / 22 / 0           | Parasitic  | None              |
| 4      | SRAE_0000058500 | Hypothetical protein                                                       | 3.3                | 0 / 1 / 0            | Unlisted   | None              |
| 5      | SRAE_2000124300 | CAP domain-containing                                                      | 69                 | 17 / 49 / 4          | Parasitic  | EC3               |
|        | SRAE_2000124400 | CAP domain-containing                                                      | 43.3               | 8 / 30 / 1           | Parasitic  | EC3               |
|        | SRAE_2000124500 | CAP domain-containing                                                      | 50.9               | 11 / 33 / 2          | Parasitic  | EC3               |
| 6      | SRAE_X000232600 | Reverse transcriptase domain and Aspartic peptidase domain-containing      | 45.8               | 62 / 51 / 1          | Unlisted   | None              |
|        | SRAE_X000232700 | Integrase, catalytic core domain and Ribonuclease H-like domain-containing | 22.2               | 5 / 1 / 1            | Unlisted   | None              |
|        | SRAE_X000232800 | Hypothetical protein                                                       | 32                 | 6 / 6 / 0            | Same       | None              |
|        | SRAE_X000232900 | Hypothetical protein                                                       | 31.7               | 4 / 4 / 0            | Unlisted   | None              |

|    |                                       |                                                      |      |              |           |      |
|----|---------------------------------------|------------------------------------------------------|------|--------------|-----------|------|
|    | SRAE_X000233000                       | Zinc finger, CCHC-type domain-containing             | 11.8 | 14 / 36 / 0  | Unlisted  | None |
|    | SRAE_X000233100                       | Hypothetical protein                                 | 11.3 | 12 / 22 / 1  | Unlisted  | None |
|    |                                       |                                                      |      |              |           |      |
| 7  | SRAE_0000057800                       | Hypothetical protein                                 | 28.5 | 1 / 9 / 0    | Parasitic | None |
|    |                                       |                                                      |      |              |           |      |
| 8  | SRAE_X000062200<br><b>(discarded)</b> | Poly-glutamine tract binding protein 1               | 0    | 0 / 0 / 0    | Unlisted  | EC13 |
|    | SRAE_X000062300<br><b>(discarded)</b> | Acetylcholinesterase                                 | 66.2 | 29 / 86 / 0  | Same      | EC13 |
|    |                                       |                                                      |      |              |           |      |
| 9  | SRAE_2000478200                       | Hypothetical protein                                 | 6.2  | 4 / 0 / 0    | Unlisted  | None |
|    | SRAE_2000478300                       | Hypothetical protein                                 | 21.1 | 5 / 6 / 0    | Same      | None |
|    | SRAE_2000478400                       | Hypothetical protein                                 | 90.7 | 10 / 29 / 1  | Unlisted  | None |
|    | SRAE_2000478500                       | CAP domain-containing                                | 89.3 | 17 / 47 / 0  | Parasitic | None |
|    |                                       |                                                      |      |              |           |      |
| 10 | SRAE_X000050900                       | Hypothetical protein                                 | 66.7 | 13 / 34 / 0  | Parasitic | None |
|    | SRAE_X000051000                       | Hypothetical protein                                 | 44.5 | 8 / 21 / 0   | Parasitic | None |
|    | SRAE_X000051100                       | Hypothetical protein                                 | 53   | 6 / 27 / 1   | Parasitic | None |
|    |                                       |                                                      |      |              |           |      |
| 12 | SRAE_X000026900                       | Hypothetical protein                                 | 51   | 5 / 19 / 0   | Parasitic | None |
|    | SRAE_X000027000                       | Hypothetical protein                                 | 15.8 | 3 / 4 / 0    | Unlisted  | None |
|    |                                       |                                                      |      |              |           |      |
| 13 | SRAE_1000139800                       | Hypothetical protein                                 | 8    | 12 / 2 / 0   | Unlisted  | None |
|    | SRAE_1000139900                       | Protein-tyrosine phosphatase-containing              | 54.6 | 42 / 145 / 1 | Same      | None |
|    | SRAE_1000140000                       | Translation initiation factor SU11 domain-containing | 0    | 0 / 0 / 0    | Same      | None |
|    | SRAE_1000140100                       | Hypothetical protein                                 | 0    | 0 / 0 / 0    | Same      | None |
|    | SRAE_1000140200                       | Hypothetical protein                                 | 18.1 | 2 / 8 / 0    | Same      | None |
|    |                                       |                                                      |      |              |           |      |
| 14 | SRAE_2000076600                       | CAP domain-containing                                | 21.2 | 3 / 14 / 0   | Parasitic | EC2  |
|    | SRAE_2000076700                       | CAP domain-containing                                | 60.4 | 11 / 39 / 0  | Parasitic | EC2  |

|    |                 |                                         |      |              |             |      |
|----|-----------------|-----------------------------------------|------|--------------|-------------|------|
|    | SRAE_2000076800 | CAP domain-containing                   | 39.2 | 11 / 18 / 1  | Parasitic   | EC2  |
|    | SRAE_2000076900 | CAP domain-containing                   | 36.8 | 6 / 25 / 0   | Parasitic   | EC2  |
|    | SRAE_2000077000 | CAP domain-containing                   | 19   | 6 / 9 / 1    | Parasitic   | EC2  |
|    |                 |                                         |      |              |             |      |
| 15 | SRAE_2000499000 | Hypothetical protein                    | 55.9 | 2 / 25 / 1   | Parasitic   | None |
|    | SRAE_2000499100 | Hypothetical protein                    | 35.8 | 7 / 12 / 0   | Parasitic   | None |
|    |                 |                                         |      |              |             |      |
| 16 | SRAE_X000037500 | Hypothetical protein                    | 21.7 | 8 / 18 / 1   | Unlisted    | None |
|    |                 |                                         |      |              |             |      |
| 17 | SRAE_X000066000 | Trypsin Inhibitor-like                  | 36.3 | 38 / 77 / 0  | Parasitic   | None |
|    | SRAE_X000066100 | Astacin                                 | 28.2 | 18 / 23 / 0  | Parasitic   | None |
|    |                 |                                         |      |              |             |      |
| 18 | SRAE_X000032850 | Hypothetical protein                    | 69.2 | 4 / 18 / 0   | Unlisted    | None |
|    | SRAE_X000032900 | Hypothetical protein                    | 54.6 | 8 / 11 / 0   | Unlisted    | None |
|    | SRAE_X000033000 | Hypothetical protein                    | 78.6 | 9 / 20 / 0   | Unlisted    | None |
|    | SRAE_X000033100 | Hypothetical protein                    | 46   | 4 / 12 / 0   | Unlisted    | None |
|    |                 |                                         |      |              |             |      |
| 19 | SRAE_X000050700 | Hypothetical protein                    | 34.9 | 9 / 15 / 0   | Parasitic   | None |
|    | SRAE_X000050800 | Hypothetical protein                    | 37   | 7 / 16 / 0   | Parasitic   | None |
|    |                 |                                         |      |              |             |      |
| 20 | SRAE_0000074500 | Aspartic peptidase domain-containing    | 46.4 | 93 / 116 / 6 | Free-living | None |
|    | SRAE_0000074600 | Aspartic peptidase domain-containing    | 9.5  | 15 / 19 / 1  | Unlisted    | None |
|    |                 |                                         |      |              |             |      |
| 21 | SRAE_X000145900 | Astacin                                 | 82.7 | 27 / 76 / 1  | Same        | None |
|    | SRAE_X000146000 | Astacin                                 | 21.4 | 7 / 19 / 1   | Para        | None |
|    |                 |                                         |      |              |             |      |
| 22 | SRAE_X000186500 | Reverse transcriptase domain-containing | 25.3 | 37 / 65 / 2  | Free-living | None |
|    | SRAE_X000186600 | Cytochrome C oxidase subunit II         | 43.6 | 14 / 51 / 0  | Same        | None |
|    |                 |                                         |      |              |             |      |

|    |                                       |                                         |      |              |             |       |
|----|---------------------------------------|-----------------------------------------|------|--------------|-------------|-------|
| 23 | SRAE_X000146300<br><b>(discarded)</b> | Hypothetical protein                    | 31.3 | 5 / 5 / 1    | Unlisted    | FR15L |
|    | SRAE_X000146400<br><b>(discarded)</b> | Hypothetical protein                    | 6.4  | 2 / 1 / 0    | Unlisted    | FR15L |
| 24 | SRAE_0000074000                       | Hypothetical protein                    | 16.7 | 3 / 6 / 1    | Unlisted    | None  |
|    | SRAE_0000074100                       | Hypothetical protein                    | 10.4 | 2 / 6 / 0    | Unlisted    | None  |
|    | SRAE_0000074200                       | Aspartic peptidase domain-containing    | 42   | 86 / 74 / 0  | Same        | None  |
| 25 | SRAE_2000460700                       | Hypothetical protein                    | 52.4 | 20 / 112 / 1 | Parasitic   | None  |
|    | SRAE_2000460800                       | Hypothetical protein                    | 4.6  | 1 / 1 / 0    | Parasitic   | None  |
|    | SRAE_2000460900                       | Hypothetical protein                    | 6.7  | 1 / 3 / 1    | Same        | None  |
| 26 | SRAE_X000063000<br><b>(discarded)</b> | Acetylcholinesterase                    | 15.2 | 9 / 18 / 0   | Parasitic   | EC13  |
|    | SRAE_X000063100<br><b>(discarded)</b> | Poly-glutamine tract binding protein 1  | 0.4  | 0 / 1 / 0    | Same        | FR13R |
| 27 | SRAE_1000045700                       | E3 ubiquitin-protein ligase MYCBP2      | 4.9  | 51 / 20 / 0  | Free-living | None  |
|    | SRAE_1000045800                       | Lipase, class 3 family-containing       | 15.2 | 7 / 8 / 0    | Parasitic   | None  |
|    | SRAE_1000045900                       | CAP domain-containing                   | 76   | 19 / 67 / 0  | Parasitic   | None  |
|    | SRAE_1000046000                       | Speckle-type POZ                        | 4.2  | 4 / 1 / 0    | Same        | None  |
| 28 | SRAE_X000051500                       | CTP synthase 2                          | 26.6 | 5 / 23 / 1   | Unlisted    | None  |
|    | SRAE_X000051600                       | CTP synthase 2                          | 62.4 | 6 / 26 / 0   | Unlisted    | None  |
|    | SRAE_X000051700                       | Hypothetical protein                    | 9.1  | 1 / 3 / 0    | Parasitic   | None  |
|    | SRAE_X000051800                       | CTP synthase 2                          | 6.4  | 2 / 2 / 1    | Unlisted    | None  |
| 29 | SRAE_0000058000                       | Reverse transcriptase domain-containing | 40.7 | 19 / 46 / 0  | Unlisted    | None  |
|    | SRAE_0000058100                       | Integrase                               | 38.9 | 18 / 21 / 3  | Unlisted    | None  |

|    |                                       |                                               |       |             |             |       |
|----|---------------------------------------|-----------------------------------------------|-------|-------------|-------------|-------|
|    | SRAE_0000058200                       | Hypothetical protein                          | 26.5  | 3 / 3 / 1   | Unlisted    | None  |
|    | SRAE_0000058300                       | Reverse transcriptase domain-containing       | 3.3   | 2 / 8 / 0   | Unlisted    | None  |
|    |                                       |                                               |       |             |             |       |
| 30 | SRAE_X000146200<br><b>(discarded)</b> | Hypothetical protein                          | 23.2  | 4 / 6 / 1   | Unlisted    | FR15L |
|    |                                       |                                               |       |             |             |       |
| 31 | SRAE_0000049800                       | Transposase, ISXO2-like domain-containing     | 24.9  | 2 / 6 / 2   | Unlisted    | None  |
|    | SRAE_0000049900                       | Integrase                                     | 9.6   | 4 / 20 / 2  | Unlisted    | None  |
|    |                                       |                                               |       |             |             |       |
| 32 | SRAE_X000088600                       | Ras-like protein 3                            | 0     | 0 / 0 / 0   | Free-living | None  |
|    |                                       |                                               |       |             |             |       |
| 33 | SRAE_X000195800                       | Hypothetical protein                          | 0     | 0 / 0 / 0   | Parasitic   | None  |
|    | SRAE_X000195900                       | Hypothetical protein                          | 30.7  | 2 / 6 / 0   | Parasitic   | None  |
|    | SRAE_X000196000                       | Hypothetical protein                          | 12.4  | 1 / 6 / 0   | Parasitic   | None  |
|    | SRAE_X000196100                       | Hypothetical protein                          | 31.1  | 2 / 4 / 1   | Unlisted    | None  |
|    |                                       |                                               |       |             |             |       |
| 34 | SRAE_0000025500                       | Plasma membrane calcium-transporting ATPase 3 | 2.2   | 4 / 5 / 0   | Free-living | None  |
|    | SRAE_0000025600                       | Transthyretin-like family-containing          | 103.9 | 11 / 37 / 0 | Parasitic   | None  |
|    | SRAE_0000025650                       | Hypothetical protein                          | 26.3  | 2 / 9 / 1   | Unlisted    | None  |
|    | SRAE_0000025700                       | Transthyretin-like family-containing          | 0     | 0 / 0 / 0   | Parasitic   | None  |
|    | SRAE_0000025800                       | Protein argonaute-4                           | 4.9   | 5 / 9 / 0   | Parasitic   | None  |
|    |                                       |                                               |       |             |             |       |
| 35 | SRAE_0000007600                       | Amino acid transporter                        | 2.5   | 4 / 0 / 0   | Free-living | None  |
|    | SRAE_0000007700                       | Cathepsin L.1                                 | 13.4  | 9 / 4 / 0   | Unlisted    | None  |
|    | SRAE_0000007800                       | Cathepsin L.1                                 | 8.2   | 3 / 5 / 0   | Free-living | None  |
|    | SRAE_0000007900                       | Hypothetical protein                          | 29.5  | 14 / 20 / 0 | Parasitic   | None  |
|    | SRAE_0000008000                       | Hypothetical protein                          | 37.5  | 10 / 32 / 1 | Parasitic   | None  |
|    |                                       |                                               |       |             |             |       |
| 36 | SRAE_X000138600                       | Hypothetical protein                          | 2.2   | 0 / 1 / 0   | Same        | None  |

|    |                 |                                                               |      |             |             |      |
|----|-----------------|---------------------------------------------------------------|------|-------------|-------------|------|
|    | SRAE_X000138700 | MAM domain and Concanavalin A-like lectin                     | 2.3  | 4 / 0 / 0   | Same        | None |
|    |                 |                                                               |      |             |             |      |
| 37 | SRAE_X000236650 | Hypothetical protein                                          | 24.4 | 3 / 18 / 1  | Unlisted    | None |
|    | SRAE_X000236700 | Ribonuclease H-like domain and AT hook-like family-containing | 10   | 2 / 7 / 0   | Unlisted    | None |
|    | SRAE_X000236800 | Hypothetical protein                                          | 18.3 | 1 / 8 / 1   | Unlisted    | None |
|    | SRAE_X000236900 | Aspartic peptidase domain-containing                          | 13.9 | 10 / 25 / 0 | Unlisted    | None |
|    | SRAE_X000237000 | Hypothetical protein                                          | 26.5 | 8 / 1 / 1   | Unlisted    | None |
|    | SRAE_X000237100 | Hypothetical protein                                          | 29.2 | 3 / 7 / 0   | Unlisted    | None |
|    |                 |                                                               |      |             |             |      |
| 38 | SRAE_0000057900 | Hypothetical protein                                          | 42.9 | 3 / 10 / 0  | Parasitic   | None |
|    |                 |                                                               |      |             |             |      |
| 39 | SRAE_0000008000 | Hypothetical protein                                          | 37.5 | 10 / 32 / 1 | Parasitic   | None |
|    | SRAE_0000008100 | Sulfotransferase family-containing                            | 19.8 | 5 / 20 / 0  | Parasitic   | None |
|    | SRAE_0000008200 | Astacin-like metalloendopeptidase                             | 4.3  | 4 / 1 / 0   | Parasitic   | None |
|    |                 |                                                               |      |             |             |      |
| 40 | SRAE_2000478600 | CAP domain-containing                                         | 90   | 12 / 51 / 1 | Parasitic   | None |
|    | SRAE_2000478610 | Hypothetical protein                                          | 7.5  | 1 / 3 / 0   | Unlisted    | None |
|    | SRAE_2000478700 | Zinc finger, BED-type predicted domain-containing             | 8    | 8 / 8 / 0   | Free-living | None |
|    |                 |                                                               |      |             |             |      |
| 41 | SRAE_2000499200 | Hypothetical protein                                          | 75.7 | 8 / 27 / 2  | Parasitic   | None |
|    | SRAE_2000499210 | Hypothetical protein                                          | 40.7 | 5 / 17 / 0  | Parasitic   | None |
|    | SRAE_2000499300 | Hypothetical protein                                          | 15.5 | 2 / 6 / 0   | Parasitic   | None |
|    |                 |                                                               |      |             |             |      |
| 42 | SRAE_X000104500 | Hypothetical protein                                          | 22.2 | 30 / 81 / 0 | Parasitic   | None |
|    |                 |                                                               |      |             |             |      |
| 43 | SRAE_X000038200 | Hypothetical protein                                          | 25.2 | 8 / 5 / 0   | Unlisted    | None |
|    | SRAE_X000038300 | Synaptogyrin                                                  | 3.1  | 2 / 1 / 0   | Free-living | None |
|    | SRAE_X000038400 | EF-hand domain                                                | 2.9  | 2 / 0 / 0   | Unlisted    | None |
|    | SRAE_X000038500 | RUN domain-containing                                         | 4.9  | 4 / 5 / 0   | Parasitic   | None |



|    |                                       |                                              |      |              |             |      |
|----|---------------------------------------|----------------------------------------------|------|--------------|-------------|------|
|    |                                       |                                              |      |              |             |      |
| 44 | SRAE_X000246300                       | Hypothetical protein                         | 0    | 0 / 0 / 0    | Same        | None |
|    |                                       |                                              |      |              |             |      |
| 45 | SRAE_X000222600                       | Hypothetical protein                         | 30.8 | 1 / 10 / 0   | Parasitic   | None |
|    |                                       |                                              |      |              |             |      |
| 46 | SRAE_X000158400                       | Astacin-like metalloendopeptidase            | 1.4  | 0 / 2 / 0    | Free-living | None |
|    | SRAE_X000158500                       | Acetylcholinesterase                         | 8.7  | 1 / 14 / 0   | Parasitic   | None |
|    |                                       |                                              |      |              |             |      |
| 47 | SRAE_2000420700                       | CAP domain-containing                        | 34.1 | 5 / 28 / 0   | Parasitic   | None |
|    | SRAE_2000420800                       | Hypothetical protein                         | 11.1 | 0 / 4 / 0    | Unlisted    | None |
|    |                                       |                                              |      |              |             |      |
| 48 | SRAE_X000221400                       | U1 small nuclear ribonucleoprotein<br>70 kDa | 0    | 0 / 0 / 0    | Same        | None |
|    | SRAE_X000221500                       | Hypothetical protein                         | 5.8  | 0 / 2 / 0    | Unlisted    | None |
|    | SRAE_X000221600                       | Hypothetical protein                         | 46.4 | 7 / 9 / 0    | Unlisted    | None |
| 49 | SRAE_X000062400<br><b>(discarded)</b> | Acetylcholinesterase                         | 24.9 | 14 / 28 / 1  | same        | EC13 |
|    |                                       |                                              |      |              |             |      |
| 50 | SRAE_X000201100                       | Astacin                                      | 29.8 | 17 / 27 / 1  | Parasitic   | None |
|    | SRAE_X000201200                       | Hypothetical protein                         | 12   | 1 / 5 / 0    | Unlisted    | None |
|    | SRAE_X000201300                       | Hypothetical protein                         | 0    | 0 / 0 / 0    | Unlisted    | None |
|    |                                       |                                              |      |              |             |      |
| 51 | SRAE_X000247200                       | Carboxylesterase                             | 6.1  | 1 / 13 / 0   | Free-living | None |
|    | SRAE_X000247300                       | ShKT domain-containing                       | 41.8 | 28 / 100 / 0 | Parasitic   | None |
|    |                                       |                                              |      |              |             |      |
| 52 | SRAE_1000127500                       | Amino acid transporter                       | 48.2 | 41 / 34 / 0  | Same        | None |
|    | SRAE_1000127600                       | Farnesyltransferase, CAAX box,<br>beta       | 14   | 34 / 16 / 0  | Same        | None |
|    | SRAE_1000127700                       | Hypothetical protein                         | 2.6  | 1 / 1 / 0    | Unlisted    | None |
|    |                                       |                                              |      |              |             |      |
| 53 | SRAE_X000027100                       | Hypothetical protein                         | 16.4 | 2 / 6 / 0    | Parasitic   | None |
|    | SRAE_X000027200                       | Hypothetical protein                         | 38.3 | 13 / 13 / 1  | Parasitic   | None |
|    | SRAE_X000027300                       | Hypothetical protein                         | 8.2  | 2 / 2 / 0    | Parasitic   | None |

|    |                 |                                               |      |             |           |       |
|----|-----------------|-----------------------------------------------|------|-------------|-----------|-------|
| 54 | SRAE_X000144200 | Astacin                                       | 39.5 | 24 / 24 / 1 | Same      | EC14  |
|    | SRAE_X000144210 | Astacin                                       | 21.5 | 6 / 21 / 0  | Parasitic | EC14  |
|    | SRAE_X000144220 | Hypothetical protein                          | 9.4  | 4 / 4 / 0   | Same      | FR14R |
| 55 | SRAE_X000199600 | Hypothetical protein                          | 11.8 | 2 / 9 / 0   | Unlisted  | None  |
|    | SRAE_X000199700 | Integrase                                     | 8.7  | 5 / 11 / 0  | Unlisted  | None  |
|    | SRAE_X000199800 | Hypothetical protein                          | 19.5 | 2 / 5 / 1   | Unlisted  | None  |
|    | SRAE_X000199900 | Zinc finger, CCHC-type domain-containing      | 24.5 | 9 / 14 / 0  | Unlisted  | None  |
|    | SRAE_X000200000 | Reverse transcriptase domain-containing       | 38.4 | 25 / 20 / 1 | Unlisted  | None  |
|    | SRAE_X000200100 | Hypothetical protein                          | 34.2 | 22 / 16 / 1 | Unlisted  | None  |
| 56 | SRAE_1000059600 | Ground-like domain-containing                 | 22.8 | 22 / 50 / 0 | Same      | None  |
|    | SRAE_1000059700 | Phosphate-regulating neutral endopeptidase    | 14.6 | 10 / 13 / 0 | Parasitic | None  |
|    | SRAE_1000059800 | Phosphate-regulating neutral endopeptidase    | 11.3 | 6 / 10 / 0  | Parasitic | None  |
|    | SRAE_1000059900 | Phosphate-regulating neutral endopeptidase    | 12.5 | 9 / 9 / 0   | Same      | None  |
| 57 | SRAE_X000168300 | Hypothetical protein                          | 46.3 | 8 / 22 / 0  | Parasitic | None  |
|    | SRAE_X000168400 | Hypothetical protein                          | 23.8 | 2 / 7 / 0   | Parasitic | None  |
| 58 | SRAE_X000200200 | Hypothetical protein                          | 3.2  | 0 / 1 / 0   | Unlisted  | None  |
|    | SRAE_X000200300 | Hypothetical protein                          | 2    | 1 / 0 / 0   | Parasitic | None  |
| 59 | SRAE_0000065600 | Hypothetical protein                          | 69.8 | 28 / 30 / 3 | Unlisted  | None  |
|    | SRAE_0000065700 | Hypothetical protein                          | 24.8 | 3 / 6 / 0   | Unlisted  | None  |
|    | SRAE_0000065800 | Hypothetical protein                          | 12.6 | 1 / 3 / 0   | Unlisted  | None  |
|    | SRAE_0000065900 | Ribonuclease H-like domain-containing protein | 6.4  | 2 / 2 / 0   | Unlisted  | None  |

|    |                                       |                                         |      |             |           |      |
|----|---------------------------------------|-----------------------------------------|------|-------------|-----------|------|
| 60 | SRAE_2000325900<br><b>(discarded)</b> | Astacin                                 | 25.3 | 13 / 20 / 0 | Parasitic | EC5  |
|    | SRAE_2000326000                       | Astacin                                 | 7.6  | 3 / 7 / 0   | Parasitic | EC5  |
| 61 | SRAE_X000233200                       | Hypothetical protein                    | 11.8 | 6 / 14 / 1  | Unlisted  | None |
|    | SRAE_X000233300                       | Hypothetical protein                    | 11.3 | 2 / 3 / 0   | Unlisted  | None |
|    | SRAE_X000233400                       | Hypothetical protein                    | 23.8 | 3 / 14 / 0  | Unlisted  | None |
|    | SRAE_X000233500                       | Reverse transcriptase domain-containing | 23.7 | 10 / 31 / 4 | Unlisted  | None |
|    | SRAE_X000233600                       | Hypothetical protein                    | 30.5 | 9 / 37 / 1  | Unlisted  | None |
| 62 | SRAE_2000124600                       | CAP domain-containing                   | 8.7  | 3 / 5 / 0   | Parasitic | EC3  |
|    | SRAE_2000124700                       | CAP domain-containing                   | 5.2  | 0 / 4 / 1   | Parasitic | EC3  |
|    | SRAE_2000124800                       | CAP domain-containing                   | 6.5  | 4 / 2 / 0   | Parasitic | EC3  |
|    | SRAE_2000124900                       | CAP domain-containing                   | 6.6  | 2 / 4 / 0   | Parasitic | EC3  |
|    | SRAE_2000125000<br><b>(discarded)</b> | CAP domain-containing                   | 2.2  | 1 / 1 / 0   | Parasitic | EC3  |
|    | SRAE_2000125100<br><b>(discarded)</b> | CAP domain-containing                   | 38.6 | 9 / 25 / 2  | Parasitic | EC3  |

949

950 **Supplementary Table 6. The hundred most parasitic genes.** Gene gives the gene's designation; Predicted function is the WormBase  
951 ParaSite description of each gene, where Astacin-like metalloendopeptidase is abbreviated to Astacin; Coding SNPs per kb is the number  
952 of SNPs per kb within the coding sequence of that gene; SNP type is the absolute number of synonymous (S), nonsynonymous (NS) and  
953 STOP codon-causing SNPs; Fold change is the log<sub>2</sub> difference in expression of the gene between the parasitic female and free-living  
954 female morphs taken from Hunt *et al.*, 2016, here shown as positive values indicating greater expression in the parasitic female morph;  
955 Expansion cluster is expansion cluster or associated flanking region a gene belongs to, if any; Variable region is as defined in  
956 **Supplementary Table 5.** Some genes are marked as "discarded", because they had poor underlying assembly according to Gap5 analysis  
957 of expansion clusters and flanking regions and so were discounted from analyses.  
958

| Gene                           | Predicted function                           | Coding SNPs per kb | SNP type (S/NS/STOP) | Fold Change | Expansion cluster | Variable region |
|--------------------------------|----------------------------------------------|--------------------|----------------------|-------------|-------------------|-----------------|
| SRAE_2000436100                | Hypothetical protein                         | 4.7                | 1 / 2 / 0            | 14.5        | None              | None            |
| SRAE_X000014200                | Hypothetical protein                         | 15.2               | 0 / 6 / 1            | 13.4        | None              | None            |
| SRAE_X000201000                | Hypothetical protein                         | 1.9                | 0 / 1 / 0            | 13          | None              | 50              |
| SRAE_1000182300                | CAP domain-containing                        | 0                  | 0 / 0 / 0            | 12.9        | EC1               | None            |
| SRAE_2000498800                | Phloem filament PP1 domain-containing        | 0                  | 0 / 0 / 0            | 12.7        | None              | None            |
| SRAE_2000067500                | Transthyretin-like family-containing         | 15.9               | 1 / 6 / 0            | 12.6        | None              | None            |
| SRAE_X000201200                | Hypothetical protein                         | 12                 | 1 / 5 / 0            | 12.1        | None              | None            |
| SRAE_1000182700<br>(discarded) | CAP domain-containing                        | 0                  | 0 / 0 / 0            | 12.1        | EC1               | None            |
| SRAE_2000420000                | Astacin                                      | 1.7                | 0 / 1 / 1            | 12          | None              | None            |
| SRAE_X000200300                | Hypothetical protein                         | 2                  | 1 / 0 / 0            | 11.8        | None              | None            |
| SRAE_X000124900                | Hypothetical protein                         | 0                  | 0 / 0 / 0            | 11.8        | None              | None            |
| SRAE_2000485600                | Tissue inhibitor of metalloproteinase family | 15                 | 3 / 3 / 1            | 11.8        | None              | None            |
| SRAE_X000222400                | Hypothetical protein                         | 73.8               | 7 / 20 / 0           | 11.7        | None              | 45              |
| SRAE_X000055800                | Hypothetical protein                         | 54.3               | 3 / 12 / 0           | 11.7        | None              | None            |
| SRAE_2000498700                | Hypothetical protein                         | 27.8               | 4 / 9 / 0            | 11.7        | None              | None            |
| SRAE_X000124800                | Hypothetical protein                         | 0                  | 0 / 0 / 0            | 11.6        | None              | None            |
| SRAE_X000037700                | Hypothetical protein                         | 0                  | 0 / 0 / 0            | 11.6        | None              | None            |
| SRAE_0000057900                | Hypothetical protein                         | 42.9               | 3 / 10 / 0           | 11.5        | None              | 38              |
| SRAE_2000457510                | CAP domain-containing                        | 13.8               | 4 / 6 / 0            | 11.4        | None              | None            |

|                 |                                              |      |            |      |      |      |
|-----------------|----------------------------------------------|------|------------|------|------|------|
| SRAE_1000045800 | Lipase, class 3 family-containing            | 15.2 | 7 / 8 / 0  | 11.4 | None | 27   |
| SRAE_2000506800 | Hypothetical protein                         | 14.7 | 8 / 27 / 0 | 11.3 | None | None |
| SRAE_0000045600 | CAP domain-containing protein                | 9.5  | 3 / 4 / 0  | 11.3 | None | None |
| SRAE_2000453600 | Astacin                                      | 0    | 0 / 0 / 0  | 11.3 | EC7  | None |
| SRAE_2000522700 | Trypsin Inhibitor-like                       | 9    | 3 / 3 / 0  | 11.2 | None | None |
| SRAE_0000071120 | Metalloendopeptidase                         | 1    | 0 / 1 / 0  | 11.2 | None | None |
| SRAE_2000522300 | Purple acid phosphatase                      | 4.8  | 2 / 5 / 0  | 11.2 | None | None |
| SRAE_2000465200 | Hypothetical protein                         | 0    | 0 / 0 / 0  | 11.1 | None | None |
| SRAE_X000246200 | Hypothetical protein                         | 0    | 0 / 0 / 0  | 11.1 | None | None |
| SRAE_2000475600 | Hypothetical protein                         | 34.9 | 3 / 10 / 0 | 11.1 | None | None |
| SRAE_2000077400 | CAP domain-containing                        | 13   | 4 / 7 / 0  | 11.1 | EC2  | None |
| SRAE_2000465000 | Hypothetical protein                         | 0    | 0 / 0 / 0  | 11.1 | None | None |
| SRAE_X000168300 | Hypothetical protein                         | 46.3 | 8 / 22 / 0 | 11   | None | 57   |
| SRAE_2000499910 | Hypothetical protein                         | 7.5  | 2 / 2 / 0  | 11   | None | None |
| SRAE_2000499810 | Hypothetical protein                         | 41.4 | 4 / 17 / 0 | 11   | None | None |
| SRAE_0000057800 | Hypothetical protein                         | 28.5 | 1 / 9 / 0  | 11   | None | 7    |
| SRAE_0000077300 | Trypsin Inhibitor-like                       | 6.3  | 1 / 1 / 1  | 11   | None | None |
| SRAE_1000296600 | Hypothetical protein                         | 0    | 0 / 0 / 0  | 10.9 | None | None |
| SRAE_2000499820 | Hypothetical protein                         | 1.6  | 1 / 0 / 0  | 10.9 | None | None |
| SRAE_2000522600 | Trypsin Inhibitor-like                       | 25.6 | 10 / 7 / 0 | 10.9 | None | None |
| SRAE_X000144210 | Astacin                                      | 21.5 | 6 / 21 / 0 | 10.9 | EC14 | 54   |
| SRAE_2000486100 | Tissue inhibitor of metalloproteinase family | 51.9 | 7 / 17 / 0 | 10.9 | None | None |
| SRAE_X000168800 | Prolyl endopeptidase                         | 0    | 0 / 0 / 0  | 10.9 | None | None |
| SRAE_2000453500 | Astacin                                      | 2.5  | 0 / 3 / 0  | 10.8 | EC7  | None |
| SRAE_2000485800 | Tissue inhibitor of metalloproteinase family | 0    | 0 / 0 / 0  | 10.8 | None | None |
| SRAE_2000499500 | Hypothetical protein                         | 0    | 0 / 0 / 0  | 10.7 | None | 3    |
| SRAE_X000065700 | Prolyl endopeptidase                         | 3.1  | 4 / 3 / 0  | 10.7 | None | None |
| SRAE_2000461200 | Hypothetical protein                         | 25.2 | 3 / 13 / 0 | 10.7 | None | None |
| SRAE_X000051700 | Hypothetical protein                         | 9.1  | 1 / 3 / 0  | 10.6 | None | 28   |

|                                       |                                      |      |             |      |      |      |
|---------------------------------------|--------------------------------------|------|-------------|------|------|------|
| SRAE_2000456500                       | Metalloendopeptidase                 | 2.3  | 2 / 1 / 0   | 10.6 | None | None |
| SRAE_1000182400                       | CAP domain-containing                | 1.2  | 1 / 0 / 0   | 10.6 | EC1  | None |
| SRAE_2000460300                       | Zinc metalloproteinase               | 17.1 | 5 / 19 / 0  | 10.6 | None | None |
| SRAE_2000525700<br><b>(discarded)</b> | Astacin                              | 29.4 | 3 / 22 / 0  | 10.6 | EC11 | None |
| SRAE_X000201100                       | Astacin                              | 29.8 | 17 / 27 / 1 | 10.5 | None | 50   |
| SRAE_0000008000                       | Hypothetical protein                 | 37.5 | 10 / 32 / 0 | 10.5 | None | 35   |
| SRAE_X000038800                       | Hypothetical protein                 | 0    | 0 / 0 / 0   | 10.4 | None | None |
| SRAE_2000076800                       | CAP domain-containing                | 39.2 | 11 / 18 / 1 | 10.4 | EC2  | 14   |
| SRAE_2000515500                       | Hypothetical protein                 | 2.9  | 9 / 15 / 0  | 10.4 | None | None |
| SRAE_X000055700                       | Hypothetical protein                 | 0    | 0 / 0 / 0   | 10.4 | None | None |
| SRAE_1000182600<br><b>(discarded)</b> | CAP domain-containing                | 17.8 | 2 / 14 / 0  | 10.4 | EC1  | None |
| SRAE_X000168400                       | Astacin                              | 23.8 | 2 / 7 / 0   | 10.3 | None | None |
| SRAE_X000169100                       | Prolyl endopeptidase                 | 0    | 0 / 0 / 0   | 10.3 | None | None |
| SRAE_0000081000                       | Metalloendopeptidase                 | 0    | 0 / 0 / 0   | 10.3 | None | None |
| SRAE_0000000600                       | Hypothetical protein                 | 0    | 0 / 0 / 0   | 10.3 | None | None |
| SRAE_X000195900                       | Hypothetical protein                 | 30.7 | 2 / 6 / 0   | 10.3 | None | 58   |
| SRAE_2000523800                       | Astacin                              | 2.8  | 2 / 2 / 0   | 10.3 | EC10 | None |
| SRAE_1000183100<br><b>(discarded)</b> | CAP domain-containing                | 20.4 | 3 / 14 / 1  | 10.3 | EC1  | None |
| SRAE_2000077000                       | CAP domain-containing                | 19   | 6 / 9 / 1   | 10.2 | EC2  | 14   |
| SRAE_X000226400                       | CAP domain-containing                | 2    | 1 / 1 / 0   | 10.2 | None | None |
| SRAE_X000066100                       | Astacin                              | 28.2 | 18 / 23 / 0 | 10.2 | None | 17   |
| SRAE_X000055500                       | Hypothetical protein                 | 0    | 0 / 0 / 0   | 10.2 | None | None |
| SRAE_2000499920                       | Hypothetical protein                 | 85.9 | 14 / 52 / 0 | 10.2 | None | None |
| SRAE_X000191900                       | Hypothetical protein                 | 0    | 0 / 0 / 0   | 10.1 | None | 33   |
| SRAE_X000222600                       | Hypothetical protein                 | 30.8 | 1 / 10 / 0  | 10.1 | None | None |
| SRAE_2000451600                       | Transthyretin-like family-containing | 20.6 | 2 / 8 / 0   | 10.1 | None | None |
| SRAE_X000191800                       | Hypothetical protein                 | 0    | 0 / 0 / 0   | 10.1 | None | None |
| SRAE_2000455000                       | Astacin                              | 2.6  | 1 / 2 / 0   | 10.1 | EC8  | None |
| SRAE_0000078700                       | Hypothetical protein                 | 0    | 0 / 0 / 0   | 10   | None | None |

|                                       |                                               |      |             |     |      |      |
|---------------------------------------|-----------------------------------------------|------|-------------|-----|------|------|
| SRAE_2000455300                       | Acetylcholinesterase                          | 0    | 0 / 0 / 0   | 10  | EC8  | None |
| SRAE_X000200700                       | Hypothetical protein                          | 57.9 | 3 / 26 / 0  | 10  | None | None |
| SRAE_2000499200                       | Hypothetical protein                          | 75.7 | 8 / 27 / 2  | 10  | None | 41   |
| SRAE_2000071300                       | Hypothetical protein                          | 30.3 | 8 / 17 / 0  | 10  | None | None |
| SRAE_X000158300                       | Acetylcholinesterase                          | 3    | 3 / 2 / 0   | 10  | None | 57   |
| SRAE_2000124300                       | CAP domain-containing protein                 | 69   | 17 / 49 / 4 | 10  | EC3  | 5    |
| SRAE_2000457710                       | Metallopeptidase, catalytic domain-containing | 1.8  | 2 / 0 / 0   | 10  | None | None |
| SRAE_2000527500                       | CAP domain-containing                         | 3.3  | 3 / 0 / 0   | 10  | EC12 | None |
| SRAE_2000453700                       | Astacin                                       | 5.5  | 0 / 7 / 0   | 9.9 | EC7  | None |
| SRAE_2000325600                       | Astacin                                       | 0.9  | 1 / 0 / 0   | 9.9 | EC5  | None |
| SRAE_2000525800<br><b>(discarded)</b> | Astacin                                       | 1.4  | 0 / 1 / 0   | 9.9 | EC11 | None |
| SRAE_X000055600                       | Hypothetical protein                          | 0    | 0 / 0 / 0   | 9.9 | None | None |
| SRAE_2000482710                       | Zinc metalloproteinase                        | 17.8 | 6 / 19 / 0  | 9.8 | None | None |
| SRAE_0000077800                       | Hypothetical protein                          | 4.6  | 0 / 1 / 0   | 9.8 | None | None |
| SRAE_2000489900                       | Aspartic peptidase family                     | 0.9  | 1 / 0 / 0   | 9.8 | None | None |
| SRAE_2000289800<br><b>(discarded)</b> | Astacin                                       | 0    | 0 / 0 / 0   | 9.8 | EC11 | None |
| SRAE_2000508100                       | Hypothetical protein                          | 66   | 4 / 14 / 2  | 9.8 | None | None |
| SRAE_2000456300                       | Acetylcholinesterase                          | 5.2  | 1 / 8 / 0   | 9.7 | None | None |
| SRAE_0000071100                       | Metalloendopeptidase                          | 0    | 0 / 0 / 0   | 9.7 | None | None |
| SRAE_0000082200                       | Trypsin Inhibitor-like                        | 18.1 | 6 / 19 / 0  | 9.7 | None | None |
| SRAE_2000126100                       | Hypothetical protein                          | 8.6  | 6 / 2 / 0   | 9.7 | FR3R | None |
| SRAE_X000147300                       | Astacin                                       | 3    | 3 / 2 / 0   | 9.7 | None | None |
| SRAE_0000081500                       | CAP domain-containing protein                 | 5.6  | 2 / 3 / 0   | 9.7 | None | None |

960 **Supplementary Table 7. The hundred most free-living genes.** Gene gives the gene's designation; Predicted function is the WormBase  
 961 ParaSite description of each gene; Coding SNPs per kb is the number of SNPs per kb within the coding sequence of that gene; SNP type  
 962 is the absolute number of synonymous (S), nonsynonymous (NS) and STOP codon-causing SNPs; Fold change is the log<sub>2</sub> difference in  
 963 expression of the gene between the parasitic female and free-living female morphs taken from Hunt *et al.*, 2016, here shown as positive  
 964 values indicating greater expression in the free-living female morph; Expansion cluster is expansion cluster or associated flanking region  
 965 gene belongs to, if any; Variable region is as defined in **Supplementary Table 5**.  
 966

| Gene            | Predicted function                         | Coding SNPs per kb | SNP type (S/NS/STOP) | Fold Change | Expansion cluster | Variable region |
|-----------------|--------------------------------------------|--------------------|----------------------|-------------|-------------------|-----------------|
| SRAE_2000529300 | ShKT domain-containing protein             | 13.5               | 0 / 4 / 0            | 11          | None              | None            |
| SRAE_2000226500 | ShKT domain-containing protein             | 41.5               | 5 / 17 / 0           | 10.8        | None              | None            |
| SRAE_X000147400 | Phosphate-regulating neutral endopeptidase | 4.8                | 2 / 5 / 0            | 10.4        | None              | None            |
| SRAE_1000161500 | DUF148 domain-containing                   | 1.6                | 0 / 1 / 0            | 10.3        | None              | None            |
| SRAE_X000018600 | Mucin 18B                                  | 2.4                | 2 / 2 / 0            | 10.3        | None              | None            |
| SRAE_X000158400 | Astacin-like metalloendopeptidase          | 1.4                | 0 / 2 / 0            | 10.1        | None              | 46              |
| SRAE_2000474600 | ShKT domain-containing protein             | 2.2                | 0 / 2 / 0            | 10.1        | None              | None            |
| SRAE_X000135300 | Collagen alpha-5(IV) chain                 | 1                  | 1 / 0 / 0            | 10          | None              | None            |
| SRAE_2000463500 | Hypothetical protein                       | 5.5                | 1 / 1 / 1            | 9.8         | None              | None            |
| SRAE_2000079600 | Transcription factor Sp6                   | 5.3                | 3 / 1 / 0            | 8.8         | None              | None            |
| SRAE_1000062000 | Nematode cuticle collagen                  | 5.3                | 4 / 1 / 0            | 8.8         | None              | None            |
| SRAE_2000491300 | ShKT domain-containing protein             | 0                  | 0 / 0 / 0            | 8.7         | None              | None            |
| SRAE_1000170700 | Hypothetical protein                       | 6.9                | 8 / 2 / 0            | 8.6         | None              | None            |
| SRAE_1000213600 | Aspartic peptidase family                  | 2.2                | 2 / 1 / 0            | 8.5         | None              | None            |
| SRAE_2000400600 | Saposin-like type B, 1 domain              | 0                  | 0 / 0 / 0            | 8.4         | None              | None            |
| SRAE_2000477400 | ShKT domain-containing protein             | 8.4                | 1 / 5 / 0            | 8.4         | None              | None            |
| SRAE_1000227500 | Hypothetical protein                       | 3.5                | 0 / 2 / 0            | 8.2         | None              | None            |



|                 |                                                    |     |            |     |       |      |
|-----------------|----------------------------------------------------|-----|------------|-----|-------|------|
| SRAE_2000292900 | GH07323p                                           | 1.2 | 1 / 1 / 0  | 8   | None  | None |
| SRAE_X000034300 | Hypothetical protein                               | 8   | 1 / 5 / 0  | 8   | None  | None |
| SRAE_2000126900 | Nematode cuticle collagen                          | 2.1 | 1 / 1 / 0  | 7.9 | FR4R  | None |
| SRAE_X000032100 | Lipase, class 3 family-containing                  | 3.1 | 2 / 1 / 0  | 7.9 | None  | None |
| SRAE_1000151800 | Protein COL-120                                    | 4.1 | 4 / 1 / 0  | 7.7 | None  | None |
| SRAE_X000215700 | Hypothetical protein                               | 9.6 | 2 / 1 / 0  | 7.7 | None  | None |
| SRAE_2000363400 | Hypothetical protein                               | 2.8 | 1 / 0 / 0  | 7.5 | None  | None |
| SRAE_2000434700 | Collagen alpha-5(IV) chain                         | 1   | 0 / 1 / 0  | 7.5 | None  | None |
| SRAE_1000352300 | Serine/threonine- /dual specificity protein kinase | 0.8 | 1 / 0 / 0  | 7.4 | None  | None |
| SRAE_1000099100 | Hypothetical protein                               | 0.7 | 1 / 0 / 0  | 7.4 | None  | None |
| SRAE_X000100400 | Hypothetical protein                               | 0.9 | 0 / 1 / 0  | 7.4 | None  | None |
| SRAE_1000220400 | Hypothetical protein                               | 0   | 0 / 0 / 0  | 7.4 | None  | None |
| SRAE_2000033400 | Heat shock protein Hsp-12.2                        | 0   | 0 / 0 / 0  | 7.2 | None  | None |
| SRAE_1000228700 | Cell death specification protein 2                 | 1.2 | 1 / 0 / 0  | 7.2 | None  | None |
| SRAE_X000095500 | Hypothetical protein                               | 0   | 0 / 0 / 0  | 7.2 | None  | None |
| SRAE_1000073100 | Protein lin-32                                     | 0   | 0 / 0 / 0  | 7.2 | None  | None |
| SRAE_1000271200 | MSP domain; PapD-like domain-containing            | 0   | 0 / 0 / 0  | 7.2 | None  | None |
| SRAE_2000115300 | Metallothionein, family 4, echinoidea-containing   | 3   | 0 / 2 / 0  | 7.1 | None  | None |
| SRAE_1000098100 | Hypothetical protein                               | 0   | 0 / 0 / 0  | 7.1 | None  | None |
| SRAE_2000006500 | Hypothetical protein                               | 0   | 0 / 0 / 0  | 7   | None  | None |
| SRAE_2000425600 | Hypothetical protein                               | 0   | 0 / 0 / 0  | 7   | None  | None |
| SRAE_0000045200 | von Willebrand factor, type A domain-containing    | 3.2 | 10 / 8 / 0 | 7   | None  | None |
| SRAE_1000198200 | Glycoside hydrolase                                | 1.2 | 1 / 1 / 0  | 7   | None  | None |
| SRAE_1000159100 | Hypothetical protein                               | 0.7 | 0 / 1 / 0  | 6.9 | None  | None |
| SRAE_1000268100 | Nematode cuticle collagen                          | 0   | 0 / 0 / 0  | 6.9 | None  | None |
| SRAE_2000473500 | Sulfotransferase family                            | 11  | 5 / 3 / 3  | 6.9 | None  | None |
| SRAE_X000144300 | Protein GLF-1                                      | 0.6 | 0 / 1 / 0  | 6.8 | FR14R | None |

|                 |                                                        |      |           |     |      |      |
|-----------------|--------------------------------------------------------|------|-----------|-----|------|------|
| SRAE_X000086900 | Hypothetical protein                                   | 7.2  | 1 / 4 / 0 | 6.8 | None | None |
| SRAE_1000058300 | Hypothetical protein                                   | 7.6  | 3 / 6 / 0 | 6.8 | None | None |
| SRAE_X000224800 | Nematode cuticle collagen                              | 1.9  | 1 / 1 / 0 | 6.8 | None | None |
| SRAE_1000033500 | Collagen alpha-5(IV) chain                             | 0.9  | 0 / 1 / 0 | 6.7 | None | None |
| SRAE_1000004900 | Glycoside hydrolase, family 25                         | 1.3  | 1 / 0 / 0 | 6.7 | None | None |
| SRAE_1000015400 | Lipase EstA/Esterase EstB family-containing            | 2    | 1 / 1 / 0 | 6.7 | None | None |
| SRAE_2000439500 | Collagen alpha-5(IV) chain                             | 0    | 0 / 0 / 0 | 6.7 | None | None |
| SRAE_X000039100 | Brain-specific homeobox protein homolog                | 0    | 0 / 0 / 0 | 6.7 | None | None |
| SRAE_1000049700 | Hypothetical protein                                   | 0    | 0 / 0 / 0 | 6.7 | None | None |
| SRAE_1000036400 | Histidine decarboxylase                                | 12   | 3 / 4 / 0 | 6.6 | None | None |
| SRAE_2000476800 | Hypothetical protein                                   | 0    | 0 / 0 / 0 | 6.5 | None | None |
| SRAE_2000431300 | Nematode fatty acid retinoid binding family-containing | 0    | 0 / 0 / 0 | 6.5 | None | None |
| SRAE_X000210100 | Domain of unknown function DB domain-containing        | 1.3  | 1 / 0 / 0 | 6.4 | None | None |
| SRAE_2000437000 | CAP domain-containing protein                          | 12.6 | 3 / 5 / 0 | 6.4 | None | None |
| SRAE_X000195000 | Si:ch211-105d4.5                                       | 0    | 0 / 0 / 0 | 6.4 | None | None |
| SRAE_2000145200 | Nematode cuticle collagen                              | 0.9  | 1 / 0 / 0 | 6.4 | None | None |
| SRAE_2000482000 | N-acylethanolamine-hydrolyzing acid amidase            | 1.7  | 1 / 1 / 0 | 6.4 | None | None |
| SRAE_1000115300 | Hypothetical protein                                   | 1.3  | 1 / 1 / 0 | 6.3 | None | None |
| SRAE_2000459400 | Acyl-CoA N-acyltransferase domain-containing           | 0    | 0 / 0 / 0 | 6.3 | None | None |
| SRAE_2000468700 | Protein dyf-8                                          | 0    | 0 / 0 / 0 | 6.3 | None | None |
| SRAE_2000214100 | Nematode cuticle collagen                              | 1    | 1 / 0 / 0 | 6.3 | None | None |
| SRAE_2000481600 | MD-2-related lipid-recognition domain                  | 1.9  | 1 / 0 / 0 | 6.3 | None | None |
| SRAE_1000158100 | Hypothetical protein                                   | 2.5  | 2 / 2 / 0 | 6.2 | None | None |

|                 |                                                  |      |            |     |      |      |
|-----------------|--------------------------------------------------|------|------------|-----|------|------|
| SRAE_000015000  | MD-2-related lipid-recognition domain-containing | 3.7  | 0 / 2 / 0  | 6.2 | None | None |
| SRAE_2000365700 | Glycoside hydrolase, catalytic domain            | 2.5  | 0 / 1 / 1  | 6.2 | None | None |
| SRAE_2000466700 | Properdin                                        | 5    | 7 / 4 / 0  | 6   | None | None |
| SRAE_2000324800 | Hypothetical protein                             | 16.2 | 15 / 5 / 0 | 6   | None | None |
| SRAE_2000014200 | Saposin B domain                                 | 2.4  | 0 / 1 / 0  | 5.9 | None | None |
| SRAE_1000271800 | MSP domain; PapD-like domain-containing          | 0    | 0 / 0 / 0  | 5.9 | None | None |
| SRAE_1000068700 | Thrombospondin, type 1 repeat-containing         | 6.7  | 4 / 0 / 0  | 5.9 | None | None |
| SRAE_X000188000 | Sphingosine-1-phosphate lyase 1                  | 2.2  | 2 / 4 / 0  | 5.8 | None | None |
| SRAE_X000258800 | Thioredoxin-like fold domain-containing          | 0    | 0 / 0 / 0  | 5.7 | None | None |
| SRAE_2000009100 | Protein-tyrosine phosphatase                     | 1.1  | 0 / 1 / 0  | 5.7 | None | None |
| SRAE_0000012300 | Hypothetical protein                             | 4.7  | 0 / 2 / 0  | 5.7 | None | None |
| SRAE_2000448200 | Hypothetical protein                             | 5.6  | 0 / 2 / 0  | 5.6 | None | None |
| SRAE_X000101600 | Hypothetical protein                             | 5.6  | 5 / 3 / 0  | 5.6 | None | None |
| SRAE_2000041300 | LDLR class B repeat                              | 0    | 0 / 0 / 0  | 5.5 | None | None |
| SRAE_X000083300 | Protein CUTL-16                                  | 2.1  | 2 / 1 / 0  | 5.5 | None | None |
| SRAE_X000079800 | Hypothetical protein                             | 0    | 0 / 0 / 0  | 5.5 | None | None |
| SRAE_X000138300 | Protein mesh                                     | 0    | 0 / 0 / 0  | 5.4 | None | None |
| SRAE_1000020600 | Hypothetical protein                             | 4.3  | 0 / 2 / 0  | 5.4 | None | None |
| SRAE_2000476700 | Hypothetical protein                             | 0    | 0 / 0 / 0  | 5.4 | None | None |
| SRAE_2000347100 | Lipase EstA/Esterase EstB family-containing      | 1    | 0 / 1 / 0  | 5.4 | None | None |
| SRAE_2000380600 | GPCR, rhodopsin-like                             | 0.9  | 0 / 1 / 0  | 5.4 | None | None |
| SRAE_2000052400 | Alpha crystallin/Hsp20 domain                    | 1.2  | 3 / 1 / 0  | 5.4 | None | None |
| SRAE_X000138500 | Lipase, class 3 family-containing                | 8.8  | 4 / 4 / 0  | 5.3 | None | None |

|                 |                                              |      |            |     |      |      |
|-----------------|----------------------------------------------|------|------------|-----|------|------|
| SRAE_X000166100 | Protein CDH-10                               | 3.2  | 5 / 12 / 0 | 5.3 | None | None |
| SRAE_1000022400 | Epidermal growth factor-like domain          | 2.7  | 11 / 7 / 0 | 5.3 | None | None |
| SRAE_X000157300 | Homeobox protein HMX1                        | 2.5  | 1 / 2 / 0  | 5.3 | None | None |
| SRAE_X000043300 | Proteasomal ubiquitin receptor ADRM1 homolog | 6.3  | 0 / 7 / 0  | 5.3 | None | None |
| SRAE_2000424300 | Fatty-acid amide hydrolase 2                 | 1.8  | 3 / 0 / 0  | 5.3 | None | None |
| SRAE_X000098100 | Astacin-like metalloendopeptidase            | 1.2  | 0 / 2 / 0  | 5.3 | None | None |
| SRAE_X000095600 | Hypothetical protein                         | 4.1  | 0 / 2 / 0  | 5.2 | None | None |
| SRAE_2000482100 | Hypothetical protein                         | 11.4 | 6 / 11 / 0 | 5.2 | None | None |
| SRAE_2000377500 | Nematode cuticle collagen                    | 2    | 2 / 0 / 0  | 5.2 | None | None |
| SRAE_2000360100 | Alpha amylase family;                        | 5    | 3 / 3 / 0  | 5.2 | None | None |

967

968  
969  
970  
971  
972  
973  
974  
975

**Supplementary Table 8. *S. rattii* expansion clusters, revised after further inspection of genome assembly in the cluster region.**

Region shows the numbered Flanking Regions (FR) and Expansion Clusters (EC); Gene the genes present within these regions; Predicted function is the WormBaseParaSite's description of the gene; Coding SNPs per kb is the number of SNPs per kb within the coding sequence of that gene; SNP type is synonymous (S), non-synonymous (NS) or STOP-causing (STOP); Expression shows whether the gene is upregulated (with a difference in expression of log<sub>2</sub>-fold difference of at least 1 being considered upregulation) in the parasitic adult female morph (Parasitic), the free-living adult female morph (Free-living), or not differentially expressed (Same), all taken from Hunt *et al.*, 2016, or unlisted there.

| Region | Gene            | Predicted function                                    | Coding SNPs per kb | SNP type (S/NS/STOP) | Expression  |
|--------|-----------------|-------------------------------------------------------|--------------------|----------------------|-------------|
| FR1L   | SRAE_1000180400 | Transcriptional regulator ATRX                        | 3.7                | 6 / 5 / 0            | Parasitic   |
|        | SRAE_1000180500 | Formin                                                | 2.8                | 4 / 5 / 0            | Same        |
|        | SRAE_1000180600 | Hypothetical protein                                  | 1.4                | 0 / 2 / 0            | Same        |
|        | SRAE_1000180700 | Glycosylphosphatidylinositol-mannosyltransferase I    | 1.7                | 0 / 1 / 0            | Same        |
|        | SRAE_1000180800 | Hypothetical protein                                  | 1.9                | 1 / 0 / 0            | Same        |
|        | SRAE_1000180900 | Rhodopsin-like                                        | 0.7                | 1 / 0 / 0            | Same        |
|        | SRAE_1000181000 | TPM domain-containing protein                         | 1.4                | 0 / 1 / 0            | Same        |
|        | SRAE_1000181100 | MIF4-like                                             | 1.2                | 1 / 1 / 0            | Same        |
|        | SRAE_1000181200 | Sodium/potassium-transporting ATPase $\alpha$ subunit | 0                  | 0 / 0 / 0            | Free-living |
|        | SRAE_1000181300 | Hypothetical protein                                  | 0                  | 0 / 0 / 0            | Free-living |
|        | SRAE_1000181400 | Mediator of RNA polymerase II transcription subunit 9 | 5.2                | 2 / 0 / 0            | Same        |
|        | SRAE_1000181500 | Serine/threonine-protein kinase Chk1                  | 0.7                | 1 / 0 / 0            | Same        |
|        | SRAE_1000181600 | Hypothetical protein                                  | 1.1                | 1 / 0 / 0            | Same        |
|        | SRAE_1000181700 | Hypothetical protein                                  | 2.7                | 3 / 1 / 0            | Same        |
|        | SRAE_1000181800 | Hypothetical protein                                  | 1.2                | 0 / 1 / 0            | Free-living |
|        | SRAE_1000181900 | Eukaryotic translation initiation factor 2A           | 2.5                | 0 / 4 / 0            | Same        |
|        | SRAE_1000182000 | Hypothetical protein                                  | 0                  | 0 / 0 / 0            | Same        |
|        | SRAE_1000182100 | Heme transporter HRG                                  | 0                  | 0 / 0 / 0            | Same        |
| EC1    | SRAE_1000182200 | CAP domain-containing                                 | 1.1                | 0 / 1 / 0            | Parasitic   |
|        | SRAE_1000182300 | CAP domain-containing                                 | 0                  | 0 / 0 / 0            | Parasitic   |

|      |                 |                                                      |      |             |             |
|------|-----------------|------------------------------------------------------|------|-------------|-------------|
|      | SRAE_1000182400 | CAP domain-containing                                | 1.2  | 1 / 0 / 0   | Parasitic   |
|      | SRAE_1000183300 | CAP domain-containing                                | 3.4  | 2 / 1 / 0   | Parasitic   |
|      |                 |                                                      |      |             |             |
| FR1R | SRAE_1000183400 | Nanchung                                             | 1.4  | 1 / 2 / 0   | Same        |
|      | SRAE_1000183500 | Hypothetical protein                                 | 0    | 0 / 0 / 0   | Free-living |
|      | SRAE_1000183600 | SMc04008-like domain-containing                      | 1.4  | 0 / 3 / 0   | Same        |
|      | SRAE_1000183700 | Hypothetical protein                                 | 0    | 0 / 0 / 0   | Unlisted    |
|      | SRAE_1000183800 | 1,2-dihydroxy-3-keto-5-methylthiopentene dioxygenase | 0    | 0 / 0 / 0   | Same        |
|      | SRAE_1000183900 | Transmembrane receptor                               | 7.1  | 9 / 4 / 0   | Parasitic   |
|      | SRAE_1000184000 | Predicted transmembrane / coiled-coil 2-containing   | 0.7  | 0 / 1 / 0   | Unlisted    |
|      | SRAE_1000184100 | Band 7 protein family and Stomatin family-containing | 3.2  | 3 / 0 / 0   | Unlisted    |
|      | SRAE_1000184200 | Basic-leucine zipper domain-containing               | 2.5  | 3 / 2 / 0   | Unlisted    |
|      | SRAE_1000184300 | TBC1 domain family member 13                         | 1.6  | 2 / 0 / 0   | Unlisted    |
|      | SRAE_1000184400 | BTB/POZ domain-containing                            | 0.7  | 1 / 0 / 0   | Unlisted    |
|      |                 |                                                      |      |             |             |
| FR2L | SRAE_2000075900 | NHR/GATA-type domain-containing                      | 2.5  | 4 / 2 / 0   | Same        |
|      | SRAE_2000076000 | MIP20649p                                            | 3.2  | 6 / 3 / 0   | Same        |
|      | SRAE_2000076100 | MIP20649p                                            | 0.8  | 1 / 0 / 0   | Unlisted    |
|      | SRAE_2000076200 | Hypothetical protein                                 | 5.7  | 10 / 5 / 0  | Free-living |
|      | SRAE_2000076300 | Hypothetical protein                                 | 2.4  | 2 / 3 / 0   | Parasitic   |
|      |                 |                                                      |      |             |             |
| EC2  | SRAE_2000076400 | CAP domain-containing                                | 29.8 | 7 / 13 / 0  | Parasitic   |
|      | SRAE_2000076600 | CAP domain-containing                                | 21.2 | 3 / 14 / 0  | Parasitic   |
|      | SRAE_2000076700 | CAP domain-containing                                | 60.4 | 11 / 39 / 0 | Parasitic   |
|      | SRAE_2000076800 | CAP domain-containing                                | 39.2 | 11 / 18 / 1 | Parasitic   |
|      | SRAE_2000076900 | CAP domain-containing                                | 36.8 | 6 / 25 / 0  | Parasitic   |
|      | SRAE_2000077000 | CAP domain-containing                                | 19   | 6 / 9 / 1   | Parasitic   |
|      | SRAE_2000077100 | CAP domain-containing                                | 14   | 6 / 6 / 0   | Parasitic   |
|      | SRAE_2000077200 | UDP-glucosyltransferase                              | 12.7 | 12 / 8 / 0  | Parasitic   |
|      | SRAE_2000077300 | CAP domain-containing                                | 17.4 | 5 / 10 / 0  | Parasitic   |

|      |                 |                                               |      |             |             |
|------|-----------------|-----------------------------------------------|------|-------------|-------------|
|      | SRAE_2000077400 | CAP domain-containing                         | 13   | 4 / 7 / 0   | Parasitic   |
|      | SRAE_2000077500 | CAP domain-containing                         | 4.4  | 2 / 4 / 0   | Same        |
|      |                 |                                               |      |             |             |
| FR2R | SRAE_2000077600 | Hypothetical protein                          | 10   | 8 / 14 / 0  | Same        |
|      | SRAE_2000077700 | BTB/POZ domain-containing                     | 7.9  | 1 / 4 / 1   | Unlisted    |
|      | SRAE_2000077800 | Hypothetical protein                          | 2.9  | 1 / 0 / 0   | Unlisted    |
|      | SRAE_2000077900 | Protein kinase-like domain-containing         | 2.1  | 1 / 2 / 0   | Unlisted    |
|      | SRAE_2000078000 | Ubiquitin-conjugating enzyme, E2 domain       | 4.5  | 2 / 0 / 0   | Same        |
|      | SRAE_2000078100 | WH2 domain-containing                         | 5.9  | 3 / 0 / 0   | Same        |
|      | SRAE_2000078200 | Casein kinase II subunit beta                 | 8.3  | 2 / 3 / 0   | Same        |
|      | SRAE_2000078300 | Hypothetical protein                          | 0    | 0 / 0 / 0   | Unlisted    |
|      | SRAE_2000078400 | Hypothetical protein                          | 0    | 0 / 0 / 0   | Same        |
|      | SRAE_2000078500 | Serine/threonine-protein kinase haspin        | 11.1 | 7 / 9 / 0   | Same        |
|      | SRAE_2000078600 | PDZ domain-containing                         | 1.4  | 0 / 1 / 0   | Unlisted    |
|      | SRAE_2000078700 | CAP domain-containing                         | 15.2 | 5 / 10 / 0  | Parasitic   |
|      | SRAE_2000078800 | Hypothetical protein                          | 1.4  | 4 / 0 / 0   | Same        |
|      |                 |                                               |      |             |             |
| FR3L | SRAE_2000123100 | Transcription elongation factor SPT5          | 0.4  | 0 / 1 / 0   | Same        |
|      | SRAE_2000123200 | Armadillo-like helical domain -containing     | 1.3  | 3 / 3 / 0   | Same        |
|      | SRAE_2000123300 | Hypothetical protein                          | 0    | 0 / 0 / 0   | Unlisted    |
|      | SRAE_2000123400 | Gamma-aminobutyric acid receptor subunit beta | 2    | 3 / 0 / 0   | Same        |
|      | SRAE_2000123500 | Hypothetical protein                          | 6.1  | 2 / 1 / 0   | Unlisted    |
|      | SRAE_2000123600 | Phosphodiesterase                             | 0.9  | 2 / 0 / 0   | Same        |
|      | SRAE_2000123700 | Glycosyl transferase                          | 3.4  | 1 / 4 / 0   | Same        |
|      | SRAE_2000123800 | Tyrosine-protein kinase                       | 0    | 0 / 0 / 0   | Unlisted    |
|      | SRAE_2000123900 | Bax inhibitor 1-related family-containing     | 0    | 0 / 0 / 0   | Unlisted    |
|      | SRAE_2000124000 | Bloom syndrome protein                        | 2    | 3 / 6 / 0   | Free-living |
|      | SRAE_2000124100 | Protein lethal(2)essential for life           | 7.8  | 4 / 1 / 0   | Parasitic   |
|      | SRAE_2000124200 | Hypothetical protein                          | 14.5 | 5 / 21 / 0  | Parasitic   |
|      |                 |                                               |      |             |             |
| EC3  | SRAE_2000124300 | CAP domain-containing                         | 69   | 17 / 49 / 4 | Parasitic   |
|      | SRAE_2000124400 | CAP domain-containing                         | 43.3 | 8 / 30 / 1  | Parasitic   |

|      |                 |                                                |      |             |             |
|------|-----------------|------------------------------------------------|------|-------------|-------------|
|      | SRAE_2000124500 | CAP domain-containing                          | 50.9 | 11 / 33 / 2 | Parasitic   |
|      | SRAE_2000124600 | CAP domain-containing                          | 8.7  | 3 / 5 / 0   | Parasitic   |
|      | SRAE_2000124700 | CAP domain-containing                          | 5.2  | 0 / 4 / 1   | Parasitic   |
|      | SRAE_2000124800 | CAP domain-containing                          | 6.5  | 4 / 2 / 0   | Parasitic   |
|      | SRAE_2000124900 | CAP domain-containing                          | 6.6  | 2 / 4 / 0   | Parasitic   |
|      |                 |                                                |      |             |             |
| FR3R | SRAE_2000126100 | Hypothetical protein                           | 8.6  | 6 / 2 / 0   | Parasitic   |
|      | SRAE_2000126200 | Hypothetical protein                           | 50   | 3 / 17 / 1  | Unlisted    |
|      | SRAE_2000126290 | Hypothetical protein                           | 10.7 | 3 / 7 / 0   | Unlisted    |
|      | SRAE_2000126300 | Hypothetical protein                           | 14.1 | 6 / 7 / 0   | Parasitic   |
|      | SRAE_2000126400 | Hypothetical protein                           | 11.8 | 3 / 7 / 1   | Parasitic   |
|      | SRAE_2000126500 | Hypothetical protein                           | 0    | 0 / 0 / 0   | Parasitic   |
|      | SRAE_2000126600 | CAP domain-containing                          | 18.5 | 6 / 11 / 0  | Parasitic   |
|      | SRAE_2000126700 | Hypothetical protein                           | 3.6  | 1 / 2 / 0   | Same        |
|      | SRAE_2000126800 | Serine/threonine-protein phosphatase           | 0.5  | 0 / 1 / 0   | Unlisted    |
|      | SRAE_2000126900 | Nematode cuticle collagen                      | 2.1  | 1 / 1 / 0   | Free-living |
|      | SRAE_2000127000 | Hypothetical protein                           | 8.5  | 3 / 7 / 0   | Unlisted    |
|      | SRAE_2000127100 | Hypothetical protein                           | 2.5  | 1 / 1 / 0   | Unlisted    |
|      | SRAE_2000127200 | Flavin-containing monooxygenase                | 2.9  | 2 / 2 / 0   | Same        |
|      | SRAE_2000127300 | Serine/threonine-protein kinase RIO1           | 2.6  | 3 / 1 / 0   | Same        |
|      | SRAE_2000127400 | Hypothetical protein                           | 1.9  | 2 / 2 / 0   | Same        |
|      |                 |                                                |      |             |             |
| FR5L | SRAE_2000325100 | IA-2 ortholog                                  | 2    | 2 / 5 / 0   | Same        |
|      | SRAE_2000325200 | Hypothetical protein                           | 4.7  | 0 / 1 / 0   | Unlisted    |
|      | SRAE_2000325300 | Integrator complex subunit 9                   | 0.5  | 0 / 1 / 0   | Same        |
|      | SRAE_2000325400 | Hypothetical protein                           | 0    | 0 / 0 / 0   | Unlisted    |
|      | SRAE_2000325500 | UDP-glucuronosyltransferase                    | 3.8  | 2 / 4 / 0   | Free-living |
|      |                 |                                                |      |             |             |
| EC5  | SRAE_2000325600 | Astacin-like metalloendopeptidase              | 0.9  | 1 / 0 / 0   | Parasitic   |
|      | SRAE_2000326000 | Astacin-like metalloendopeptidase              | 7.6  | 3 / 7 / 0   | Parasitic   |
|      |                 |                                                |      |             |             |
| FR5R | SRAE_2000326100 | Epidermal growth factor-like domain-containing | 0.6  | 1 / 1 / 0   | Free-living |



|      |                 |                                            |      |             |             |
|------|-----------------|--------------------------------------------|------|-------------|-------------|
| FR6L | SRAE_2000450300 | UDP-glucosyltransferase                    | 5.7  | 2 / 7 / 0   | Parasitic   |
| EC6  | SRAE_2000450400 | Astacin-like metalloendopeptidase          | 1.9  | 1 / 2 / 0   | Parasitic   |
|      | SRAE_2000450500 | Astacin-like metalloendopeptidase          | 4    | 1 / 4 / 0   | Parasitic   |
|      | SRAE_2000450600 | Astacin-like metalloendopeptidase          | 6.5  | 2 / 6 / 0   | Parasitic   |
|      | SRAE_2000450700 | Astacin-like metalloendopeptidase          | 22.3 | 7 / 25 / 0  | Parasitic   |
| FR6R | SRAE_2000450800 | Nematode fatty acid retinoid binding       | 5.5  | 3 / 0 / 0   | Unlisted    |
|      | SRAE_2000450900 | Hypothetical protein                       | 5.3  | 1 / 5 / 0   | Unlisted    |
|      | SRAE_2000451000 | Hypothetical protein                       | 22.2 | 6 / 3 / 0   | Parasitic   |
| FR7L | SRAE_2000452400 | Hypothetical protein                       | 3.6  | 3 / 0 / 0   | Unlisted    |
|      | SRAE_2000452500 | ATP-binding cassette sub-family D member 4 | 2.3  | 3 / 1 / 0   | Free-living |
|      | SRAE_2000452600 | ATP-binding cassette sub-family D member 4 | 1.1  | 1 / 1 / 0   | Parasitic   |
|      | SRAE_2000452700 | Hypothetical protein                       | 1.7  | 1 / 2 / 0   | Unlisted    |
|      | SRAE_2000452800 | Hypothetical protein                       | 1.8  | 3 / 0 / 0   | Unlisted    |
|      | SRAE_2000452900 | Hypothetical protein                       | 0    | 0 / 0 / 0   | Unlisted    |
|      | SRAE_2000453000 | Hypothetical protein                       | 0    | 0 / 0 / 0   | Same        |
|      | SRAE_2000453100 | Hypothetical protein                       | 20.9 | 7 / 10 / 0  | Parasitic   |
| EC7  | SRAE_2000453200 | Astacin-like metalloendopeptidase          | 9.6  | 3 / 8 / 0   | Parasitic   |
|      | SRAE_2000453300 | Astacin-like metalloendopeptidase          | 2.6  | 0 / 3 / 0   | Parasitic   |
|      | SRAE_2000453400 | Sulfotransferase family-containing         | 0    | 0 / 0 / 0   | Unlisted    |
|      | SRAE_2000453500 | Astacin-like metalloendopeptidase          | 2.5  | 0 / 3 / 0   | Parasitic   |
|      | SRAE_2000453600 | Astacin-like metalloendopeptidase          | 0    | 0 / 0 / 0   | Parasitic   |
|      | SRAE_2000453700 | Astacin-like metalloendopeptidase          | 5.5  | 0 / 7 / 0   | Parasitic   |
|      | SRAE_2000453800 | Astacin-like metalloendopeptidase          | 34.8 | 15 / 26 / 0 | Parasitic   |
|      | SRAE_2000453900 | Astacin-like metalloendopeptidase          | 5.1  | 4 / 2 / 0   | Parasitic   |
| FR7R | SRAE_2000454000 | Zinc metalloproteinase                     | 3.4  | 3 / 1 / 0   | Unlisted    |
|      | SRAE_2000454100 | Hypothetical protein                       | 3.7  | 7 / 4 / 0   | Free-living |
|      | SRAE_2000454200 | Hypothetical protein                       | 0    | 0 / 0 / 0   | Same        |

|       |                 |                                                         |      |            |             |
|-------|-----------------|---------------------------------------------------------|------|------------|-------------|
|       | SRAE_2000454300 | Sulfotransferase                                        | 4.2  | 4 / 0 / 0  | Same        |
|       | SRAE_2000454400 | Sulfotransferase                                        | 1.8  | 2 / 0 / 0  | Same        |
|       | SRAE_2000454500 | Estradiol 17-beta-dehydrogenase 12                      | 0    | 0 / 0 / 0  | Parasitic   |
|       | SRAE_2000454600 | Alpha-(1,3)-fucosyltransferase C                        | 3.1  | 0 / 3 / 0  | Unlisted    |
|       | SRAE_2000454700 | Glycosyl transferase, family 14-containing              | 2.3  | 1 / 2 / 0  | Same        |
|       |                 |                                                         |      |            |             |
| FR8L  | SRAE_2000454800 | Cytochrome P450 4V2                                     | 1.3  | 1 / 1 / 0  | Same        |
|       |                 |                                                         |      |            |             |
| EC8   | SRAE_2000454900 | Acetylcholinesterase                                    | 1.2  | 2 / 0 / 0  | Parasitic   |
|       | SRAE_2000455000 | Astacin-like metalloendopeptidase                       | 2.6  | 1 / 2 / 0  | Parasitic   |
|       | SRAE_2000455100 | Hypothetical protein                                    | 1.6  | 1 / 0 / 0  | Parasitic   |
|       | SRAE_2000455200 | CAP domain-containing                                   | 0    | 0 / 0 / 0  | Parasitic   |
|       | SRAE_2000455300 | Acetylcholinesterase                                    | 0    | 0 / 0 / 0  | Parasitic   |
|       |                 |                                                         |      |            |             |
| FR8R  | SRAE_2000455400 | Hypothetical protein                                    | 0    | 0 / 0 / 0  | Unlisted    |
|       | SRAE_2000455500 | Hypothetical protein                                    | 0    | 0 / 0 / 0  | Same        |
|       | SRAE_2000455600 | Zona pellucida domain-containing                        | 0.9  | 0 / 1 / 0  | Unlisted    |
|       | SRAE_2000455700 | Hypothetical protein                                    | 0    | 0 / 0 / 0  | Free-living |
|       | SRAE_2000455800 | Hypothetical protein                                    | 0    | 0 / 0 / 0  | Unlisted    |
|       |                 |                                                         |      |            |             |
| FR9L  | SRAE_2000497000 | Hypothetical protein                                    | 1.4  | 5 / 4 / 0  | Free-living |
|       |                 |                                                         |      |            |             |
| EC9   | SRAE_2000497100 | Astacin-like metalloendopeptidase                       | 5.2  | 1 / 5 / 0  | Parasitic   |
|       |                 |                                                         |      |            |             |
| FR9R  | SRAE_2000497600 | Cad96Cb                                                 | 4.5  | 9 / 0 / 0  | Parasitic   |
|       | SRAE_2000497700 | Zinc finger, RING/FYVE/PHD-type domain-containing       | 1.5  | 1 / 0 / 0  | Parasitic   |
|       | SRAE_2000497800 | Protein lethal(2)essential for life                     | 0    | 0 / 0 / 0  | Parasitic   |
|       |                 |                                                         |      |            |             |
| FR10L | SRAE_2000522800 | Trypsin Inhibitor-like, cysteine rich domain-containing | 22.7 | 10 / 5 / 0 | Parasitic   |
|       | SRAE_2000522900 | Glycosyl transferase, family 14-containing              | 4.3  | 2 / 4 / 0  | Unlisted    |
|       | SRAE_2000523000 | Transthyretin-like family-containing                    | 9.1  | 3 / 1 / 0  | Parasitic   |

|       |                 |                                                |      |            |             |
|-------|-----------------|------------------------------------------------|------|------------|-------------|
|       | SRAE_2000523100 | 7TM GPCR, (Sre) family-containing              | 0    | 0 / 0 / 0  | Unlisted    |
|       | SRAE_2000523200 | 7TM GPCR, (Sre) family-containing              | 4.3  | 0 / 2 / 0  | Unlisted    |
|       | SRAE_2000523300 | Hypothetical protein                           | 1.4  | 0 / 1 / 0  | Unlisted    |
|       | SRAE_2000523400 | Nuclear hormone receptor                       | 3.9  | 4 / 1 / 0  | Same        |
|       | SRAE_2000523500 | Proteinase inhibitor I25                       | 0    | 0 / 0 / 0  | Free-living |
|       | SRAE_2000523600 | Carboxylic ester hydrolase                     | 3.4  | 2 / 4 / 0  | Unlisted    |
|       |                 |                                                |      |            |             |
| EC10  | SRAE_2000523700 | Astacin-like metalloendopeptidase              | 5.2  | 1 / 5 / 0  | Parasitic   |
|       | SRAE_2000523800 | Astacin-like metalloendopeptidase              | 2.8  | 2 / 2 / 0  | Parasitic   |
|       | SRAE_2000523900 | Astacin-like metalloendopeptidase              | 26.1 | 8 / 29 / 1 | Parasitic   |
|       | SRAE_2000524000 | Astacin-like metalloendopeptidase              | 4    | 1 / 4 / 0  | Parasitic   |
|       |                 |                                                |      |            |             |
| FR12L | SRAE_2000526900 | Importin-beta                                  | 2.2  | 4 / 2 / 0  | Same        |
|       | SRAE_2000527000 | Hypothetical protein                           | 14.3 | 8 / 17 / 0 | Unlisted    |
|       |                 |                                                |      |            |             |
| EC12  | SRAE_2000527100 | CAP domain-containing                          | 71.1 | 9 / 54 / 1 | Parasitic   |
|       | SRAE_2000527200 | CAP domain-containing                          | 18.6 | 1 / 15 / 1 | Parasitic   |
|       | SRAE_2000527300 | CAP domain-containing                          | 4.6  | 2 / 2 / 0  | Parasitic   |
|       | SRAE_2000527400 | CAP domain-containing                          | 5.5  | 2 / 3 / 0  | Unlisted    |
|       | SRAE_2000527500 | CAP domain-containing                          | 3.3  | 3 / 0 / 0  | Parasitic   |
|       | SRAE_2000527600 | CAP domain-containing                          | 2.2  | 0 / 2 / 0  | Parasitic   |
|       | SRAE_2000527700 | CAP domain-containing                          | 1.1  | 0 / 1 / 0  | Parasitic   |
|       |                 |                                                |      |            |             |
| FR12R | SRAE_2000527800 | Hypothetical protein                           | 18.5 | 2 / 10 / 0 | Unlisted    |
|       | SRAE_2000527900 | Hypothetical protein                           | 41.5 | 9 / 17 / 0 | Unlisted    |
|       | SRAE_2000528000 | Hypothetical protein                           | 1.8  | 0 / 1 / 0  | Unlisted    |
|       | SRAE_2000528100 | Hypothetical protein                           | 3    | 3 / 4 / 0  | Unlisted    |
|       |                 |                                                |      |            |             |
| FR14L | SRAE_X000143400 | Ferric-chelate reductase 1                     | 10.1 | 5 / 3 / 0  | Unlisted    |
|       | SRAE_X000143500 | Hypothetical protein                           | 7.1  | 7 / 9 / 0  | Same        |
|       | SRAE_X000143600 | 1x GPCR, rhodopsin-like, 7TM domain-containing | 0.7  | 1 / 0 / 0  | Same        |
|       | SRAE_X000143700 | Hypothetical protein                           | 4.1  | 3 / 1 / 0  | Same        |

|       |                 |                                   |      |             |             |
|-------|-----------------|-----------------------------------|------|-------------|-------------|
|       |                 |                                   |      |             |             |
| EC14  | SRAE_X000143800 | Astacin-like metalloendopeptidase | 15.5 | 8 / 9 / 1   | Parasitic   |
|       | SRAE_X000143900 | Astacin-like metalloendopeptidase | 18.3 | 8 / 13 / 2  | Parasitic   |
|       | SRAE_X000144000 | Astacin-like metalloendopeptidase | 7.2  | 4 / 5 / 0   | Parasitic   |
|       | SRAE_X000144100 | Astacin-like metalloendopeptidase | 2.4  | 0 / 3 / 0   | Parasitic   |
|       | SRAE_X000144200 | Astacin-like metalloendopeptidase | 39.5 | 24 / 24 / 1 | Parasitic   |
|       | SRAE_X000144210 | Astacin-like metalloendopeptidase | 21.5 | 6 / 21 / 0  | Parasitic   |
|       |                 |                                   |      |             |             |
| FR14R | SRAE_X000144220 | Hypothetical protein              | 9.4  | 4 / 4 / 0   | Same        |
|       | SRAE_X000144300 | Amine oxidase domain-containing   | 0.6  | 0 / 1 / 0   | Free-living |
|       |                 |                                   |      |             |             |
| EC15  | SRAE_X000146800 | Astacin-like metalloendopeptidase | 29.3 | 16 / 21 / 0 | Parasitic   |
|       | SRAE_X000146900 | Astacin-like metalloendopeptidase | 47.5 | 25 / 34 / 0 | Free-living |
|       |                 |                                   |      |             |             |
| FR15R | SRAE_X000146950 | Hypothetical protein              | 3.2  | 1 / 0 / 0   | Unlisted    |
|       | SRAE_X000147000 | Hypothetical protein              | 5.1  | 0 / 1 / 0   | Parasitic   |
|       | SRAE_X000147100 | Hypothetical protein              | 6.3  | 2 / 1 / 0   | Unlisted    |
|       | SRAE_X000147200 | Hypothetical protein              | 26.9 | 15 / 22 / 0 | Parasitic   |

976

977 **Supplementary Table 9. dN/dS ratios of expansion clusters and their flanking regions.**  
978 The dN/dS ratio for genes in expansion clusters and in parentheses the number of genes,  
979 N. We calculated dN/dS ratios by analysing parasites from clades 1 and 3 (**Figure 3**),  
980 treating each as separate populations.

981

| <b>Expansion cluster</b> | <b>Expansion cluster mean dN/dS ratio (N)</b> | <b>Flanking region mean dN/dS ratio (N)</b> |
|--------------------------|-----------------------------------------------|---------------------------------------------|
| <b>2</b>                 | 0.257 (1)                                     | 2.088 (2)                                   |
| <b>3</b>                 | 0.454 (5)                                     | 0.735 (6)                                   |
| <b>6</b>                 | 1.373 (1)                                     | 0.408 (1)                                   |
| <b>7</b>                 | 3.419 (2)                                     | 0.278 (3)                                   |
| <b>14</b>                | 0.322 (3)                                     | 1.242 (1)                                   |

982

983 **Supplementary Table 10. Sampling sites and times.**

984

| <b>Site (code)</b> | <b>Coordinates</b>         | <b>Type</b>              |
|--------------------|----------------------------|--------------------------|
| Cardiff (CA)       | 51°29'54"N 3°07'25"W       | Industrial               |
| Avonmouth (AM)     | 51°30'43"N 2°40'15"W       | Industrial               |
| Long Ashton (LA)   | 51°26'08"N 2°38'41"W       | Farm                     |
|                    |                            |                          |
| <b>Season</b>      | <b>Sampling start date</b> | <b>Sampling End date</b> |
| Spring             | 2.2017                     | 3.2017                   |
| Summer             | 6.2017                     | 6.2017                   |
| Autumn             | 9.2017                     | 11.2017                  |
| Winter             | 12.2017                    | 2.2018                   |

985

## SUPPLEMENTARY FIGURES

987 **Supplementary Figure 1. Frequency distribution of the number of *S. ratti* infective**  
988 **larvae isolated from infected rat faecal pellets.** Uninfected pellets (N = 178) are not  
989 shown. The x-axis is in increments of 20 larvae, with only the upper limit shown, and only  
990 alternate increments labelled.  
991

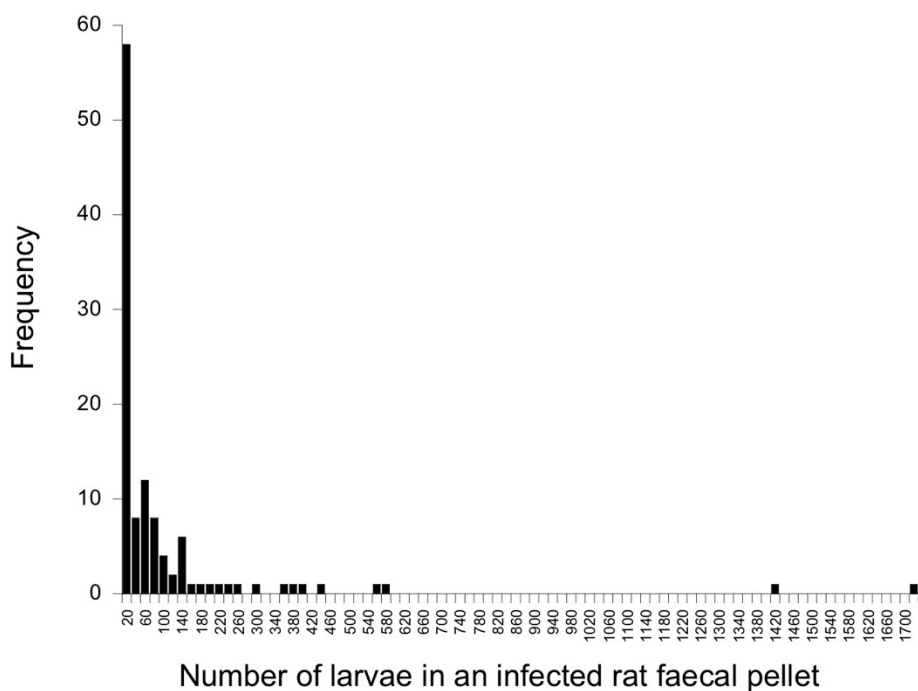

992  
993



994 **Supplementary Figure 2. Histogram of  $\Phi$  relatedness values among 90 *S. rattii* larvae.**  
995 The x-axis is in increments of 0.05 with only the upper limit shown.  
996

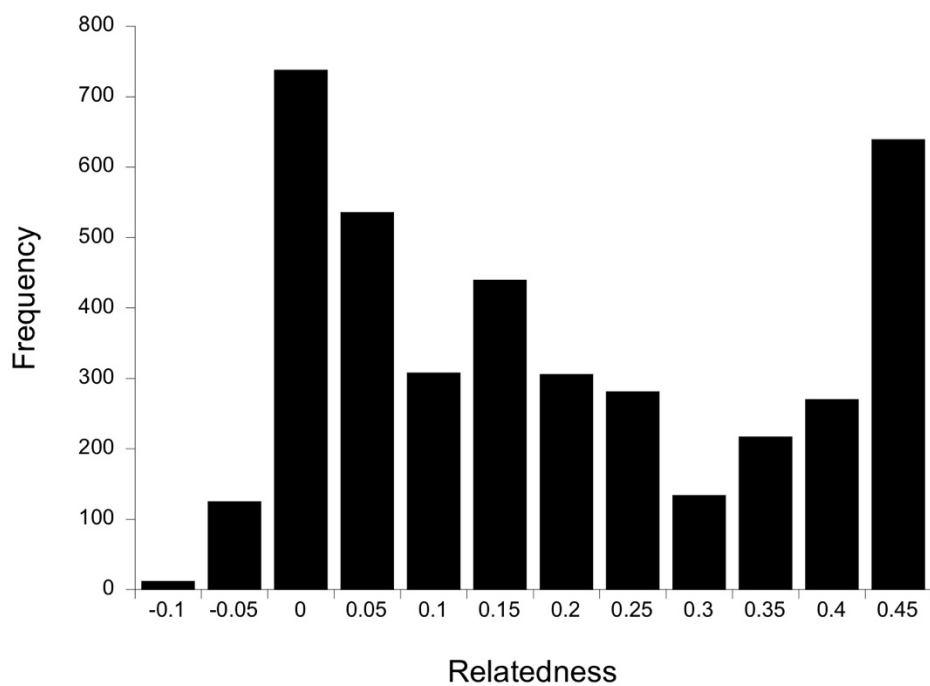

997  
998

999 **Supplementary Figure 3. The frequency distribution of the pairwise number of SNP**  
1000 **differences among the 90 parasites.** The x-axis is in categories of 10,000, save for the  
1001 first three which are 0-1,000, 1,000-5,000, 5,000-10,000; in all the lower end of the range is  
1002 shown. The frequency is 1 in the first category.  
1003

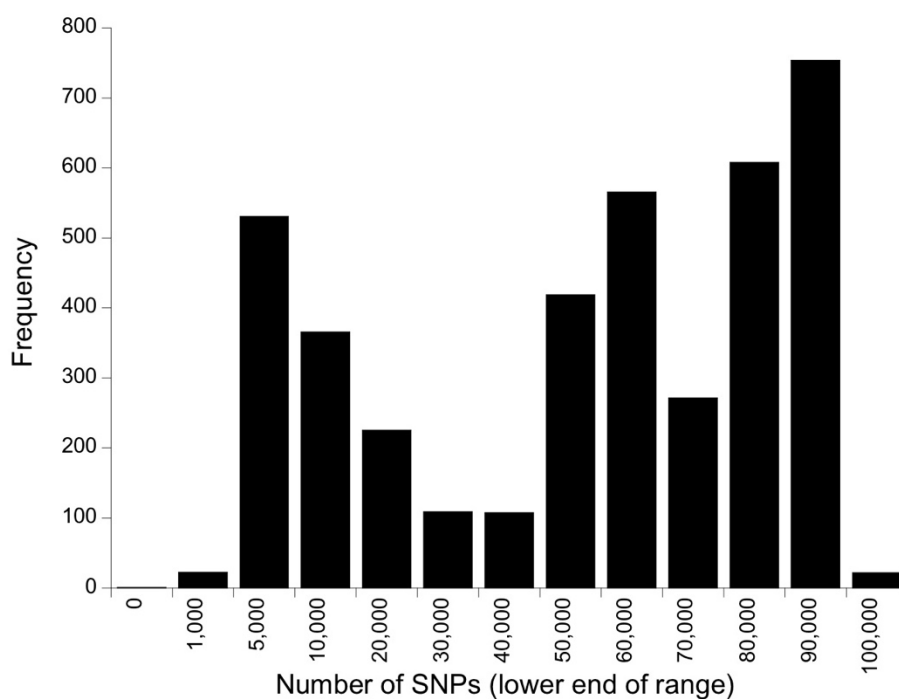

1004  
1005

1006 **Supplementary Figure 4. Maximum likelihood trees of the 90 parasites.** In each tree,  
1007 the support for each node is shown, and the clade membership of the worm is shown by the  
1008 coloured dots, which correspond to the neighbour-joining tree (**Figure 3**). Trees are  
1009 calculated based on analysis of chromosome 1 only, part 1 of chromosome 2, part 2 of  
1010 chromosome 2, part 1 of the X chromosome and part 2 of the X chromosome.  
1011

### Chromosome 1

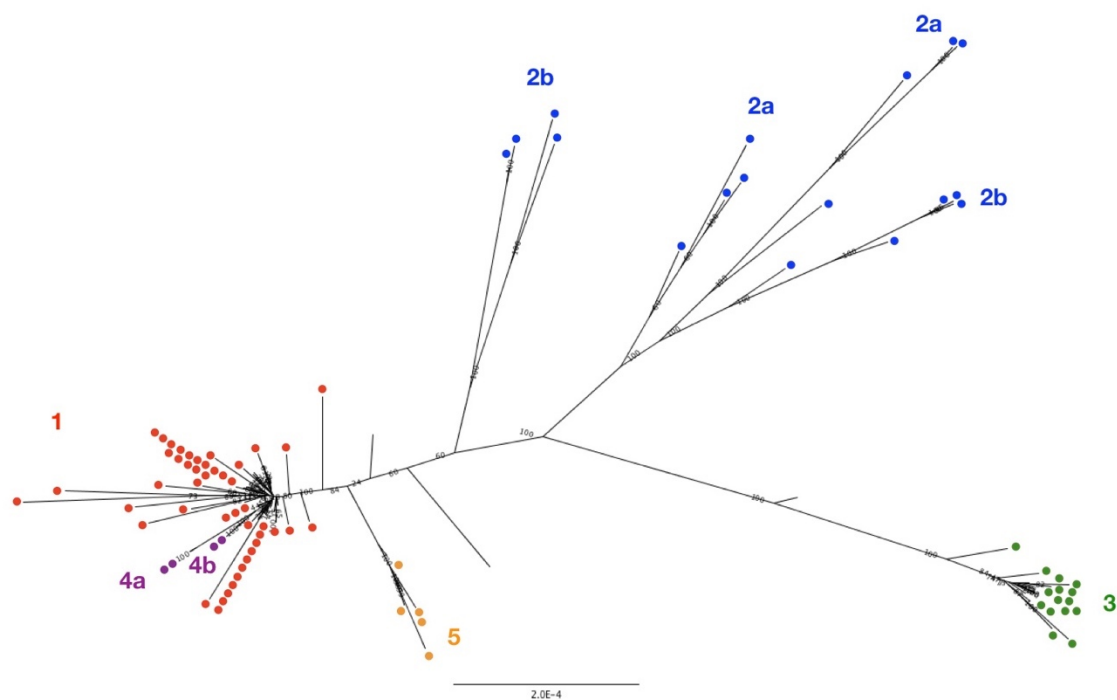

### Chromosome 2, part 1

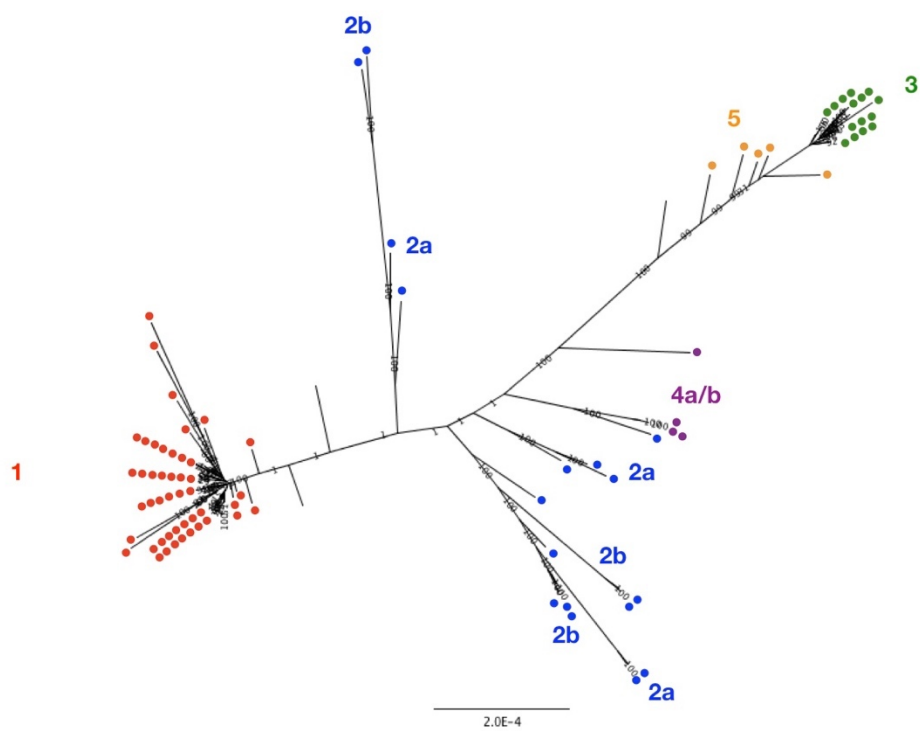

1013  
1014

### Chromosome 2, part 2

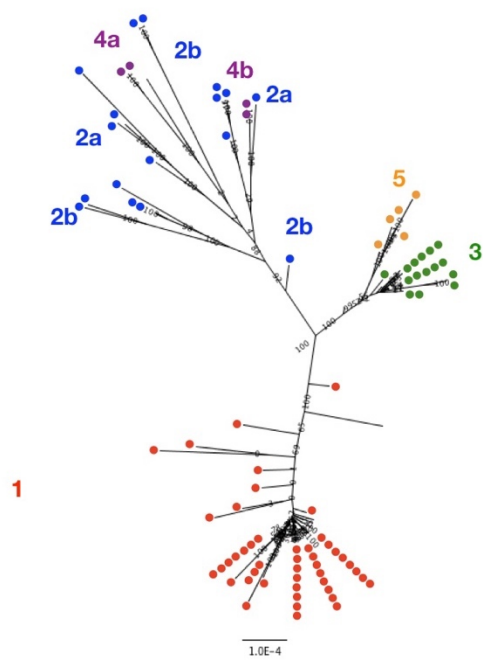

1015  
1016

1017

### Chromosome X, part 1

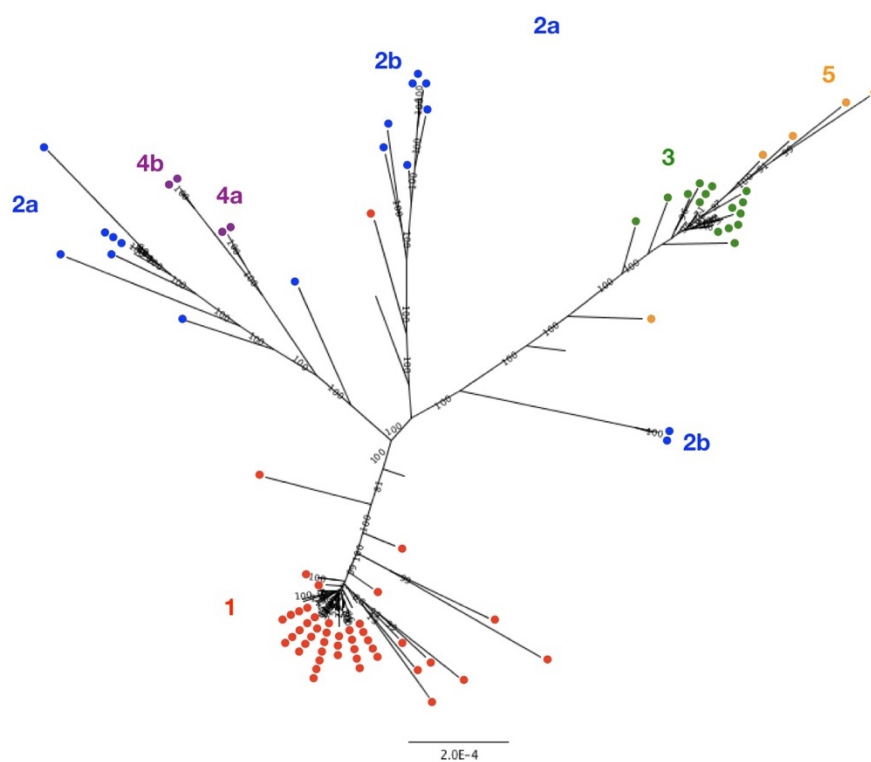

1018

1019

### Chromosome X, part 2

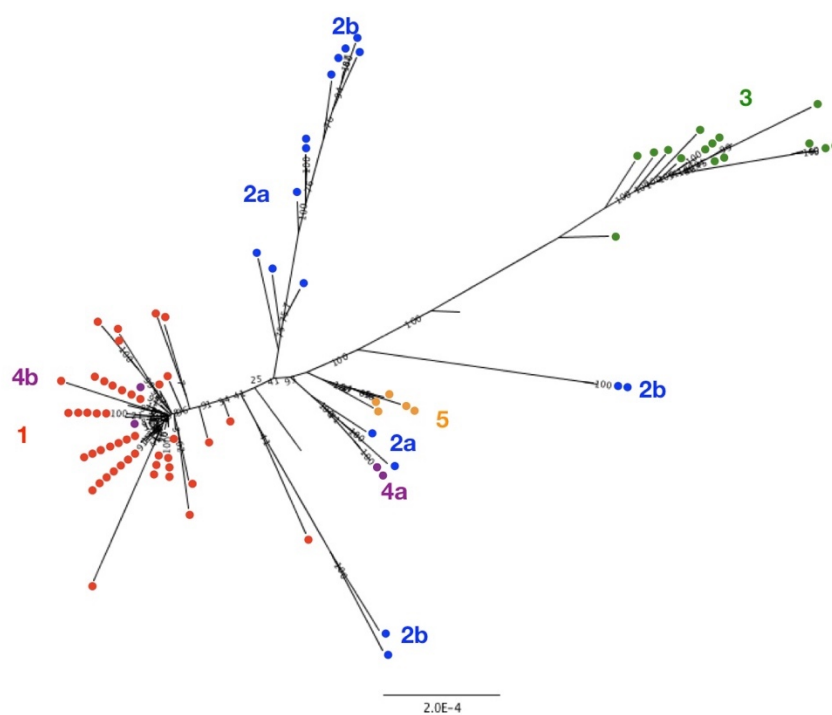

1020

1021  
1022  
1023  
1024  
1025

**Supplementary Figure 5. ADMIXTURE analysis of the 90 parasites.** The ADMIXTURE diagrams are shown for K = 2, 3, 4, 5 (with cross validation errors of 0.22965, 0.16255, 0.16335, 0.16136, respectively). For K = 6, only five groups are detected. All diagrams have the same right to left order of worms, which is shown in a Table at the end of the figure.

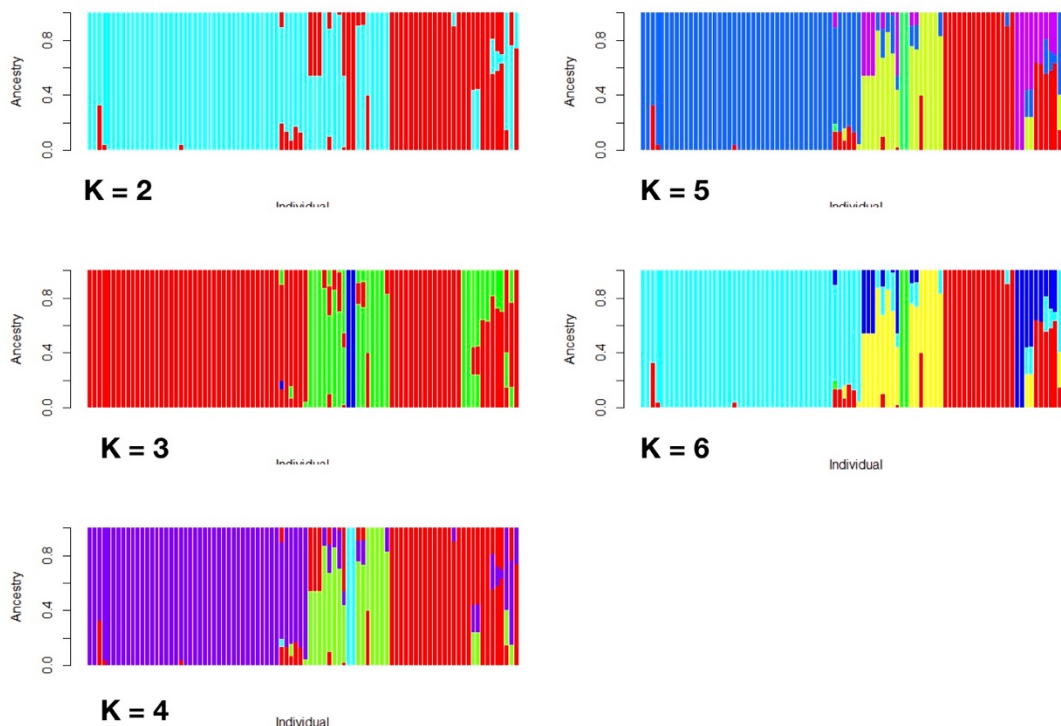

1026  
1027

| Position in ADMIXTURE diagram | Worm designation | NJ tree clade membership |
|-------------------------------|------------------|--------------------------|
| Far left                      | CA273_8          | 1                        |
|                               | CA273_30         | 1                        |
|                               | CA275_47         | 1                        |
|                               | LA217_14         | 1                        |
|                               | LA219_13         | 1                        |
|                               | LA222_45         | 1                        |
|                               | LA223_8          | 1                        |
|                               | LA223_29         | 1                        |
|                               | LFA14_5          | 1                        |
|                               | LA315_1          | 1                        |
|                               | LA315_4          | 1                        |
|                               | LA316_4          | 1                        |
|                               | LA316_5          | 1                        |
|                               | LA317_2          | 1                        |
|                               | LA319_5          | 1                        |

|  |          |    |
|--|----------|----|
|  | LA319_8  | 1  |
|  | AM99_8   | 1  |
|  | AM99_21  | 1  |
|  | AM100_37 | 1  |
|  | AM190_17 | 1  |
|  | AM194_1  | 1  |
|  | AM242_30 | 1  |
|  | AM252_62 | 1  |
|  | AM253_77 | 1  |
|  | AM280_49 | 1  |
|  | AM282_1  | 1  |
|  | AM282_67 | 1  |
|  | AM283_1  | 1  |
|  | AM283_2  | 1  |
|  | AM283_3  | 1  |
|  | AM283_4  | 1  |
|  | AM283_5  | 1  |
|  | AM284_59 | 1  |
|  | AM284_60 | 1  |
|  | AM284_61 | 1  |
|  | AM286_88 | 1  |
|  | AM286_92 | 1  |
|  | AM287_67 | 1  |
|  | AM288_1  | 1  |
|  | AM288_2  | 1  |
|  | AM291_93 | 1  |
|  | AM292_2  | 1  |
|  | AM293_2  | 1  |
|  | AM294_2  | 1  |
|  | AM296_4  | 1  |
|  | AM299_79 | 1  |
|  | CA338_1  | 2a |
|  | LA217_5  | 2a |
|  | LA319_3  | 2a |
|  | LA320_1  | 2a |
|  | AM245_61 | 2a |
|  | AM253_6  | 2a |
|  | AM287_65 | 2a |
|  | AM293_94 | 2b |
|  | CA273_38 | 2b |
|  | CA275_20 | 2b |
|  | CA338_4  | 2b |
|  | CA338_6  | 2b |
|  | LA320_11 | 2b |

|           |          |              |
|-----------|----------|--------------|
|           | AM99_31  | 2b           |
|           | AM100_35 | 2b           |
|           | AM100_50 | 2b           |
|           | AM294_4  | 2b           |
|           | CA273_10 | 3            |
|           | CA273_26 | 3            |
|           | CA275_11 | 3            |
|           | CA275_51 | 3            |
|           | LA315_3  | 3            |
|           | LA319_6  | 3            |
|           | LA320_5  | 3            |
|           | AM99_19  | 3            |
|           | AM99_30  | 3            |
|           | AM187_14 | 3            |
|           | AM258_25 | 3            |
|           | AM281_5  | 3            |
|           | AM282_63 | 3            |
|           | AM296_1  | 3            |
|           | AM298_2  | 3            |
|           | AM187_12 | 4a           |
|           | AM287_58 | 4a           |
|           | AM114_2  | 4a           |
|           | AM287_56 | 4a           |
|           | AM105_9  | 5            |
|           | AM280_56 | 5            |
|           | AM294_1  | 5            |
|           | AM295_1  | 5            |
|           | AM296_2  | 5            |
|           | AM292_3  | Not in clade |
|           | CA338_2  | Not in clade |
| Far right | AM296_5  | Not in clade |

1028



1029 **Supplementary Figure 6. PCA analysis of *S. ratti* parasites.** Projections of principal components (PC) 1 and 2 of the 90 parasites from  
1030 the three samples sites and the 10 isofemale lines, where PCs 1 and 2 explained 91% of the variance. Individuals are coloured according  
1031 to (A) sampling site and (B) neighbour-joining dendrogram clades (**Figure 3**).

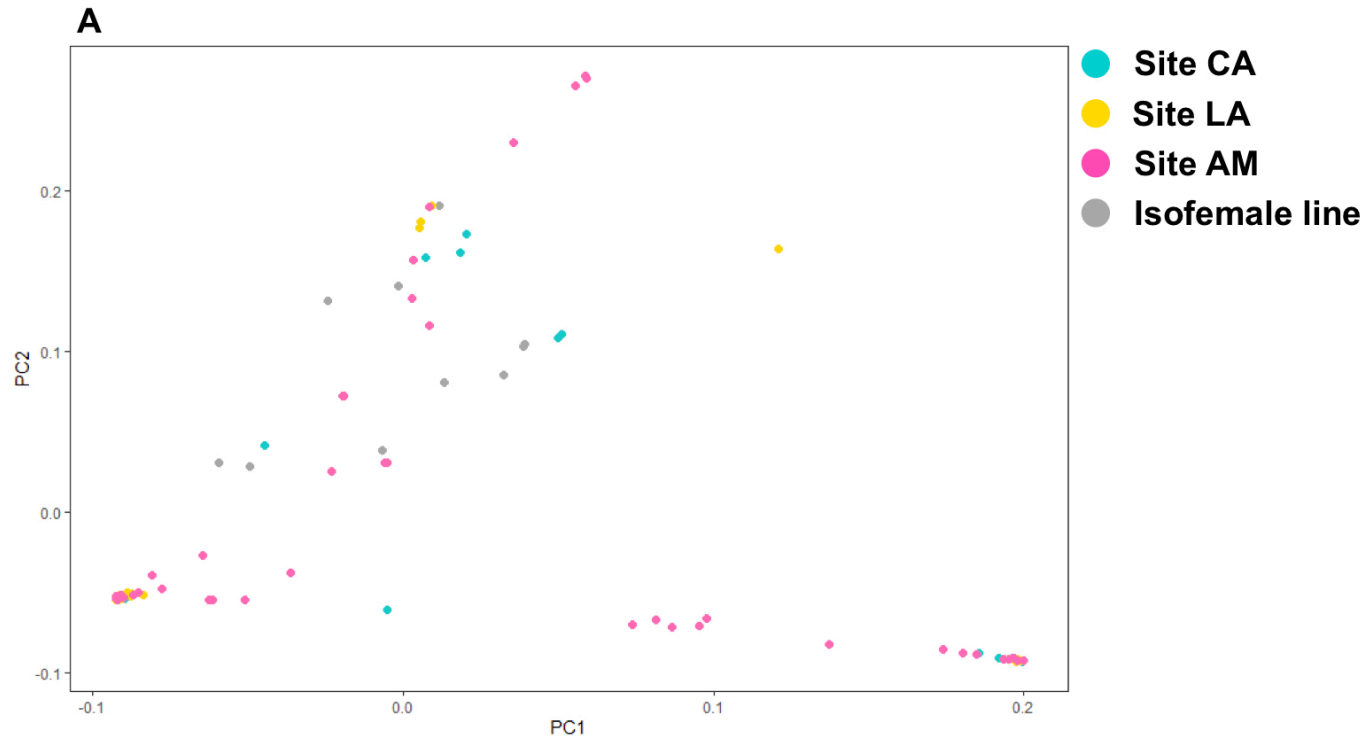

1032  
1033  
1034

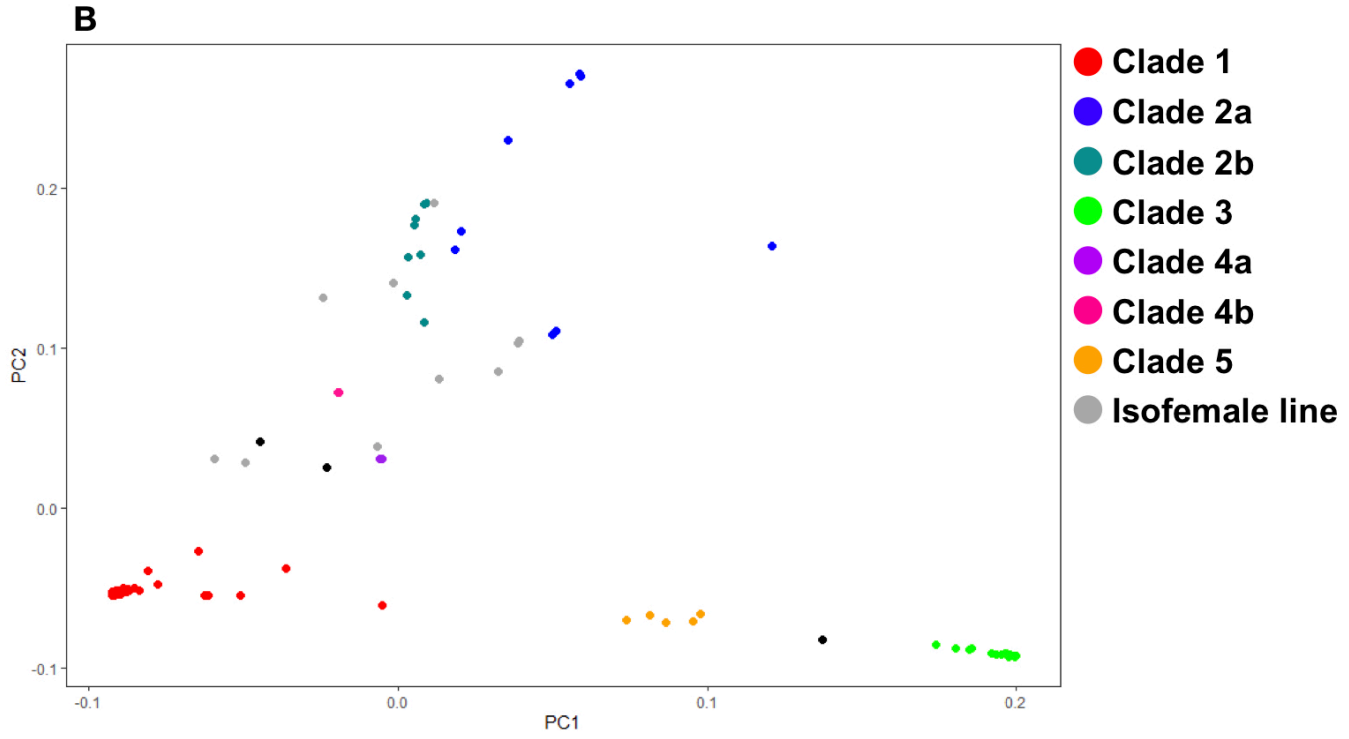

1035  
1036

1037 **Supplementary Figure 7. Minimum spanning *S. ratti* mitochondrial haplotype maps.** Individual pellets are shown by their sampling  
1038 site (AM, CA, LA) and the number preceding the underscore; the number after the underscore is the unique identifier of that worm  
1039 Haplotypes represented by multiple individuals are denoted by single letters. Four mitochondrial clades (A – D) are evident. Individual  
1040 worms are coded either by the sampling site from which they were obtained or by the nuclear clade to which they belong (**Figure 3**).  
1041 Mitochondrial clades A, B and C contained individuals from all 3 sampling sites, though at different rates. Mitochondrial clade A contains  
1042 all individuals from nuclear clades 3 and 5 as well as one individual from nuclear clade 2b. Mitochondrial clade B contains individuals from  
1043 nuclear clades 1, 2a and 4b. Mitochondrial clade C contains only individuals from nuclear clade 2b. The two individuals of nuclear clade  
1044 4a appear as intermediate between mitochondrial clades B and C in the haplotype map and so are designated as minor mitochondrial  
1045 clade D.  
1046

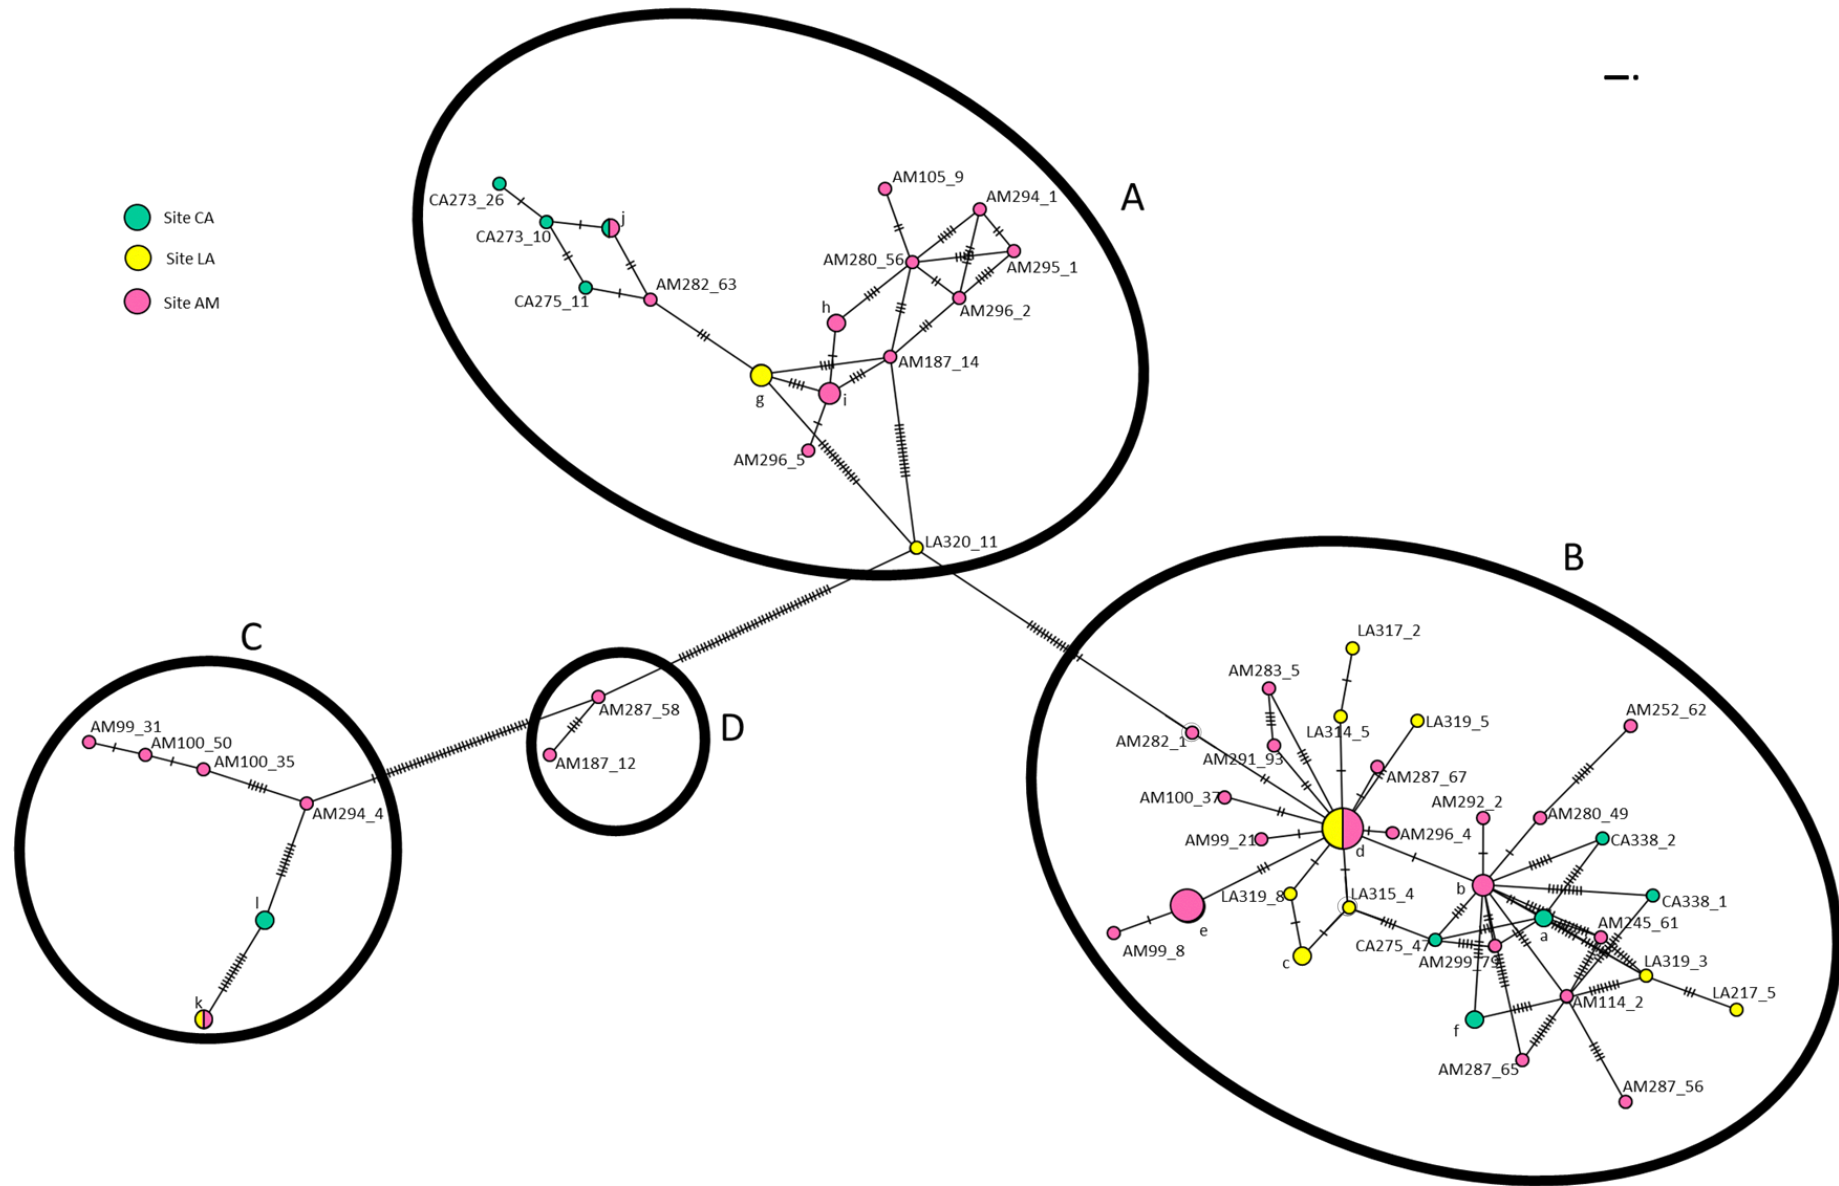

==:

- Nuclear cluster 1
- Nuclear cluster 2
- Nuclear cluster 3
- Nuclear cluster 4
- Nuclear cluster 5
- No nuclear cluster

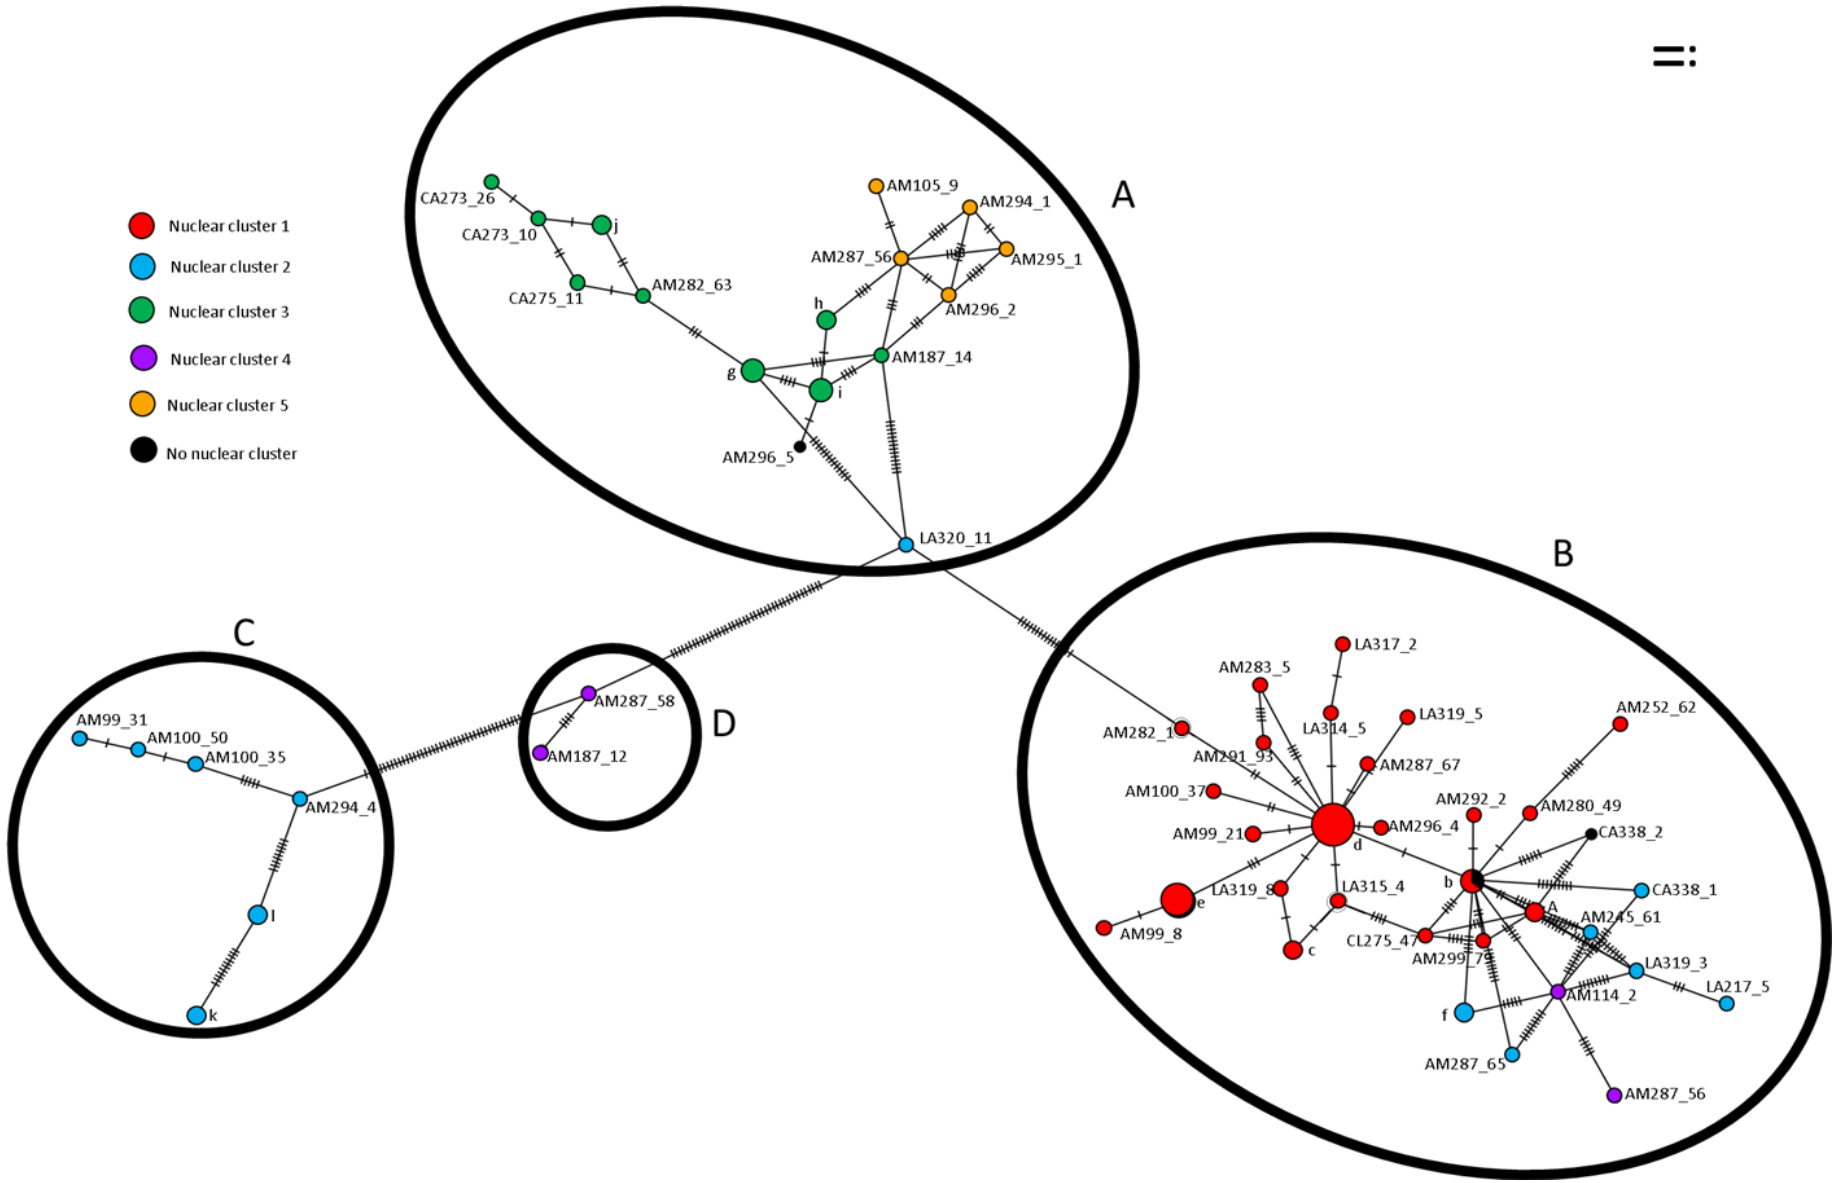

1051 **Supplementary Figure 8. Ritland and Lynch pairwise relatedness values of rats within**  
1052 **sampling sites.** The x-axis is in increments of 0.1, with only the upper limit shown. At each  
1053 site there is a right-hand skew to these distributions; Shapiro-Wilkes test for normality  
1054 statistics  $W = 0.89$  for site AM,  $W = 0.9$  for site CA and  $W = 0.87$  for site LA,  $P > 0.0001$  in  
1055 all cases.  
1056

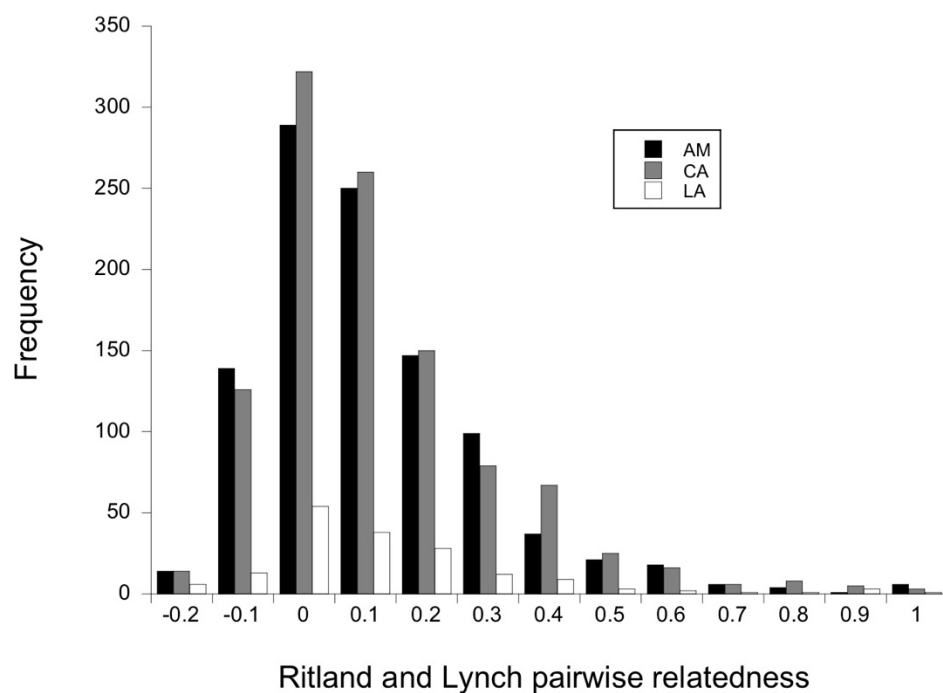

1057  
1058

1059  
1060  
1061  
1062  
1063  
1064

**Supplementary Figure 9. *S. rattii* neighbour-joining dendrograms of 10 isofemale lines and 90 larvae collected from the three sample sites.** Isofemale lines are prefixed by ED (**Supplementary Table 4**). Five of the isofemale lines (derived from parasites collected from the southern UK in 1989-90, and Japan in 1990) are within clade 2b, which is the most diverse of the clades, but the other 5 isofemale lines are in clades 1, 2a and 4.

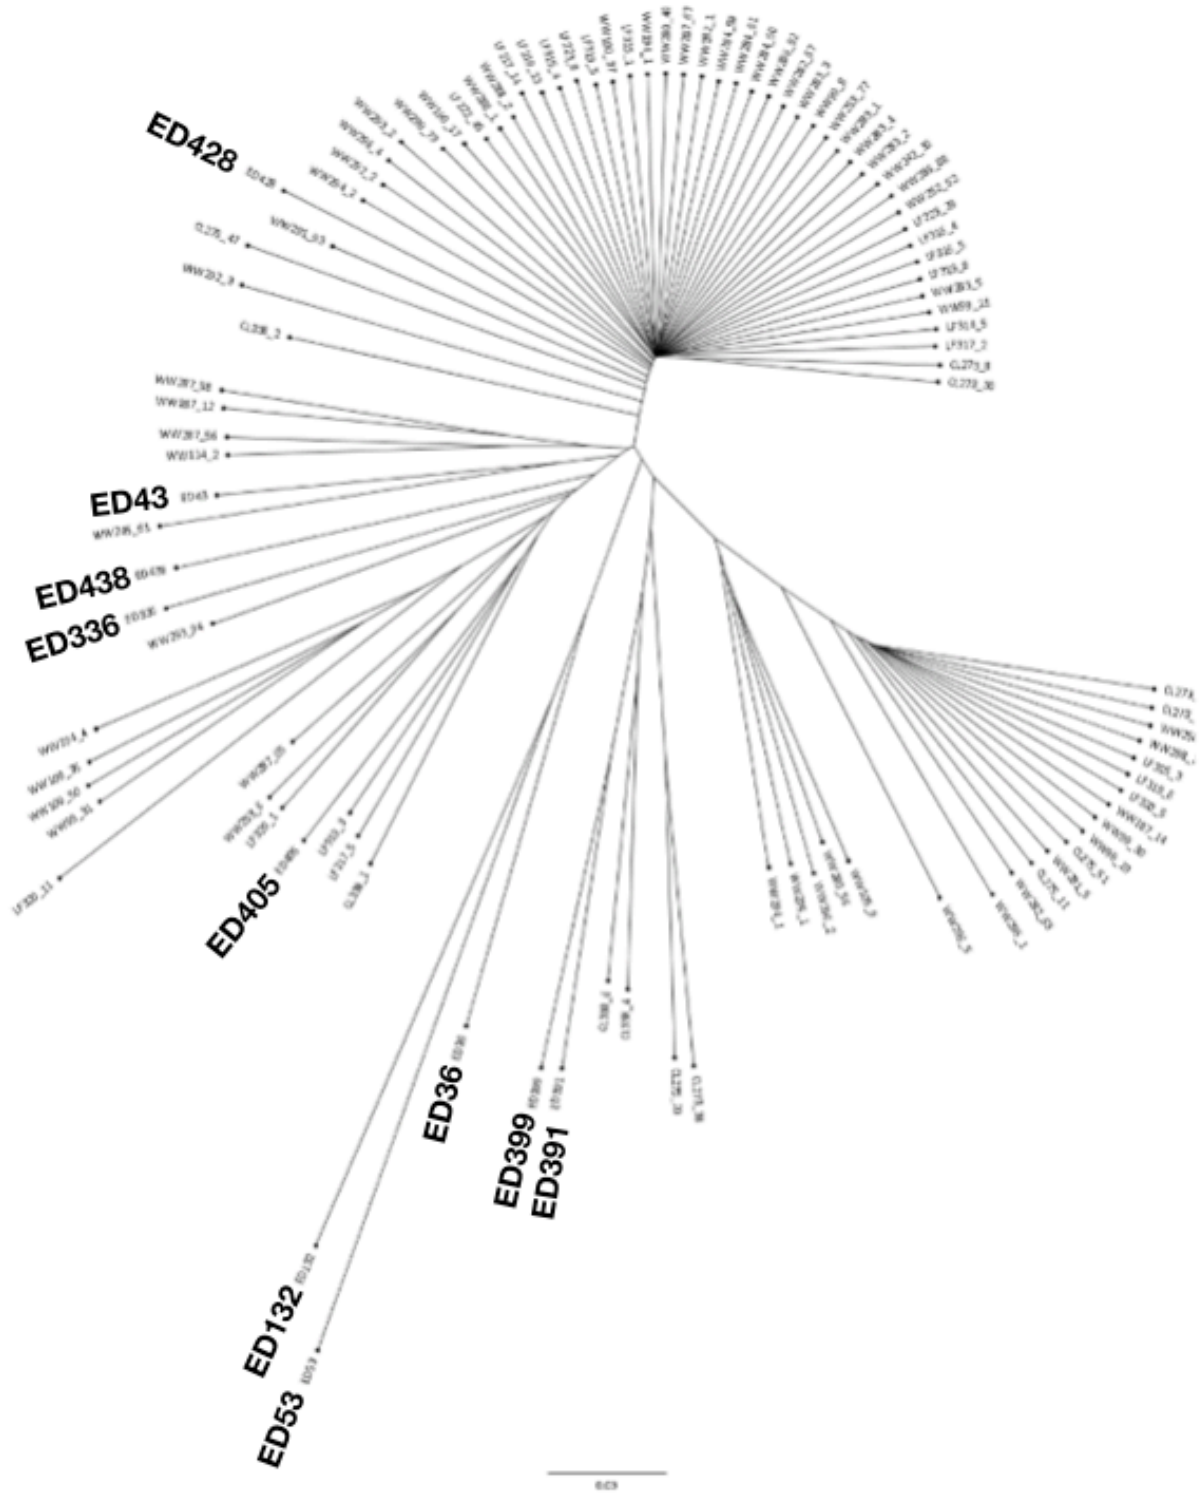

1065  
1066

1067 **Supplementary Figure 10. Linkage disequilibrium in the *S. rattii* genome.** LD shown as  
1068  $r^2$  values. X1 and X2 are the largest and second largest X chromosome scaffolds,  
1069 respectively.  
1070

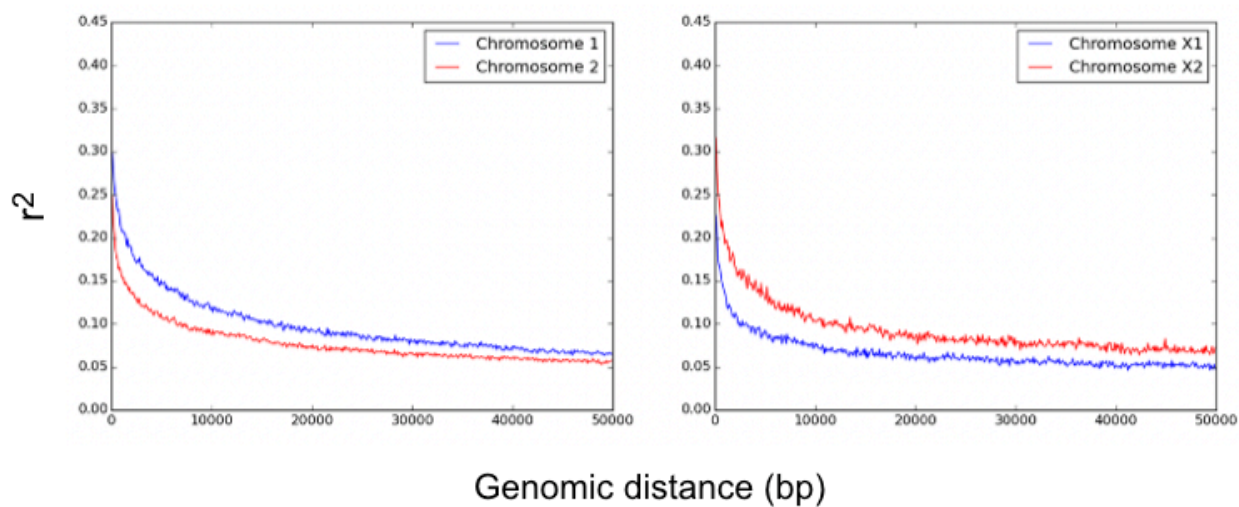

1071  
1072



1073  
1074  
1075  
1076

**Supplementary Figure 11. Linkage disequilibrium in the *S. rattii* genome for clade 1 and 3 parasites.** LD is shown as  $r^2$  values for (A) clade 1 and (B) clade 3 parasites. X1 and X2 are the largest and second largest X chromosome scaffolds, respectively.

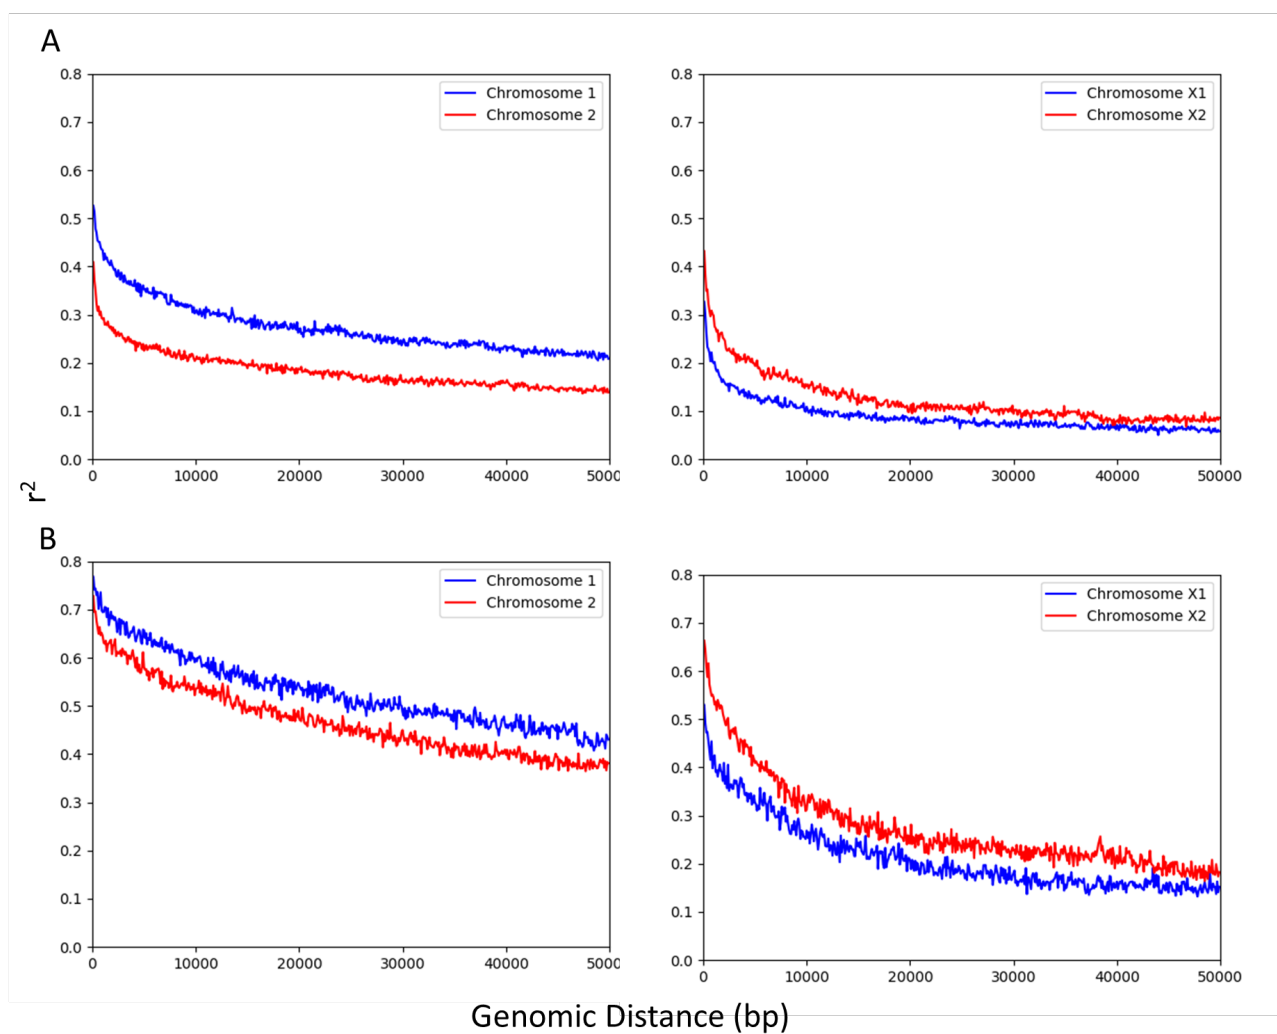

1077  
1078

1079 **Supplementary Figure 12. Heatmaps of linkage disequilibrium in the *S. rattii* genome**  
1080 **for clade 1 and 3 parasites.** LD is shown as  $r^2$  values on a coloured scale for (A) clade 1  
1081 and (B) clade 3. X1 and X2 refer to the largest and second largest scaffolds of the X  
1082 chromosome, respectively. The inserts enlarge regions to show areas of high LD.  
1083

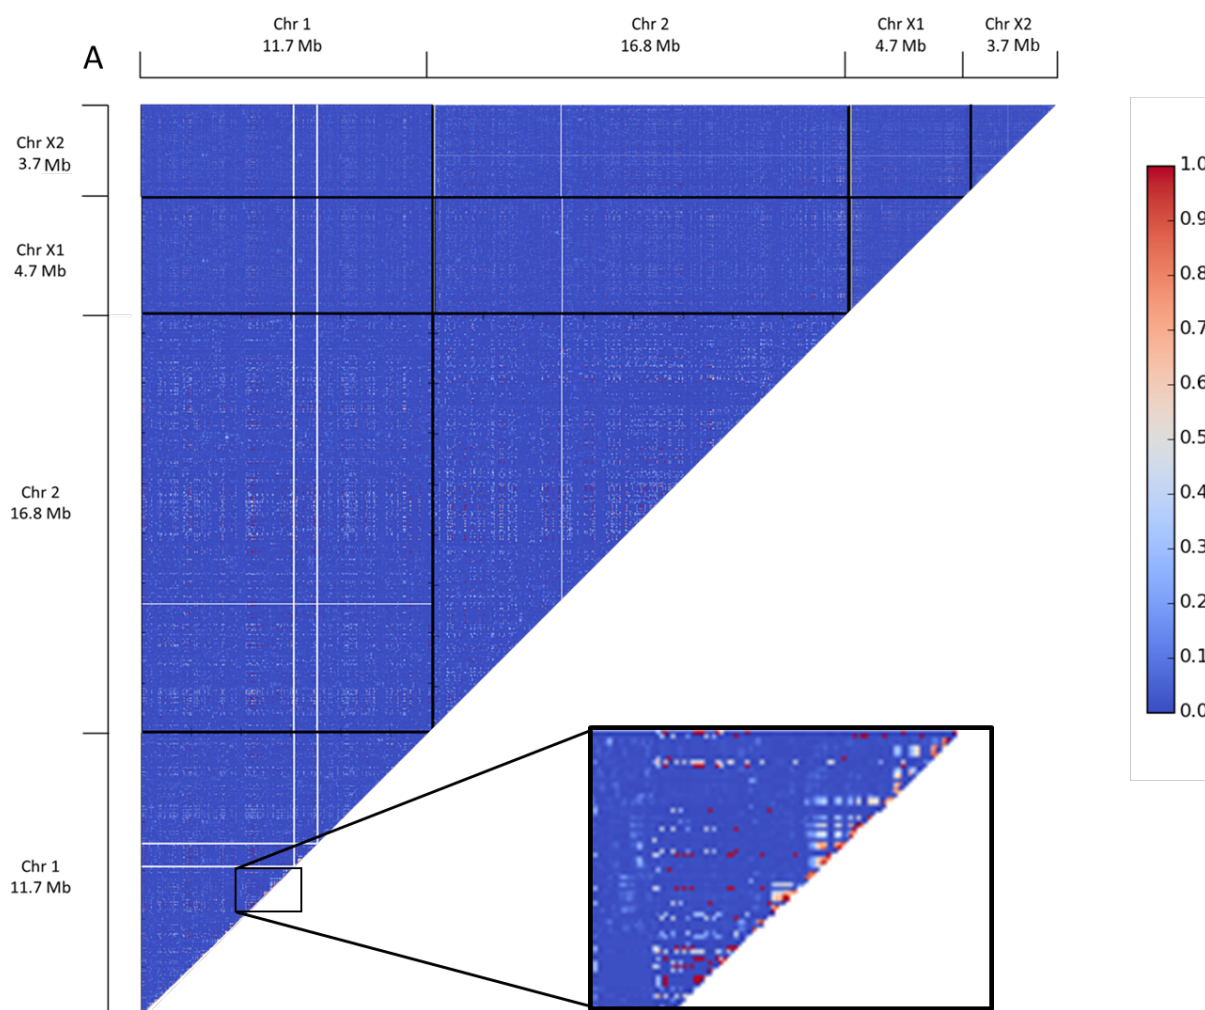

1084

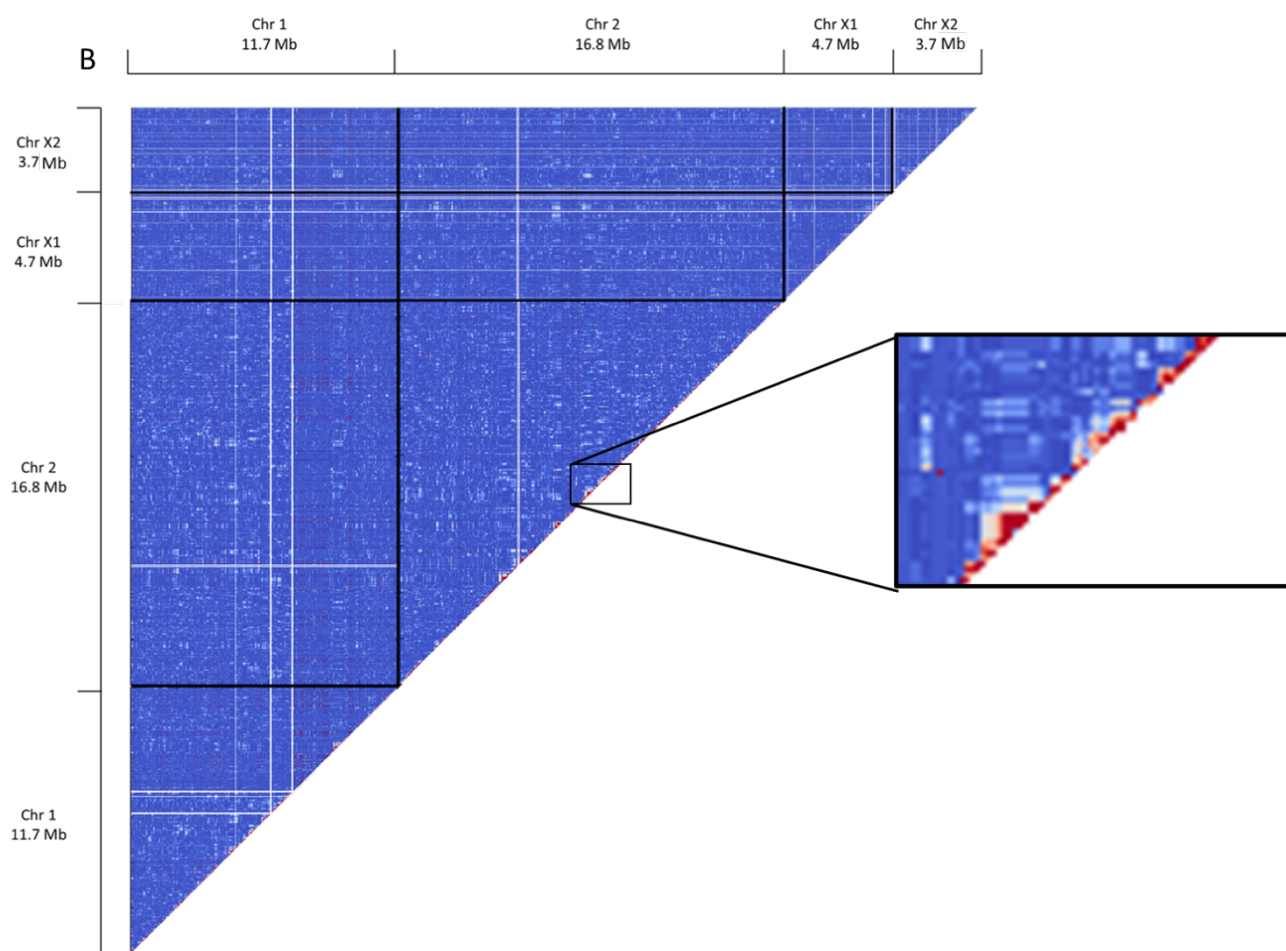

1085  
1086

1087  
1088  
1089  
1090  
1091  
1092  
1093

**Supplementary Figure 13. Heatmaps of linkage disequilibrium in the *S. rattii* genome.** Phasing of genotypes was carried out by Beagle (above the diagonal) or Shapeit (below the diagonal). X1 and X2 refer to the largest and second largest scaffolds of the X chromosome, respectively. Vertical and horizontal white lines in chromosome 1 represent two megabase long tracts of Ns that separate the three X chromosome scaffolds, whose genomic order is not known.

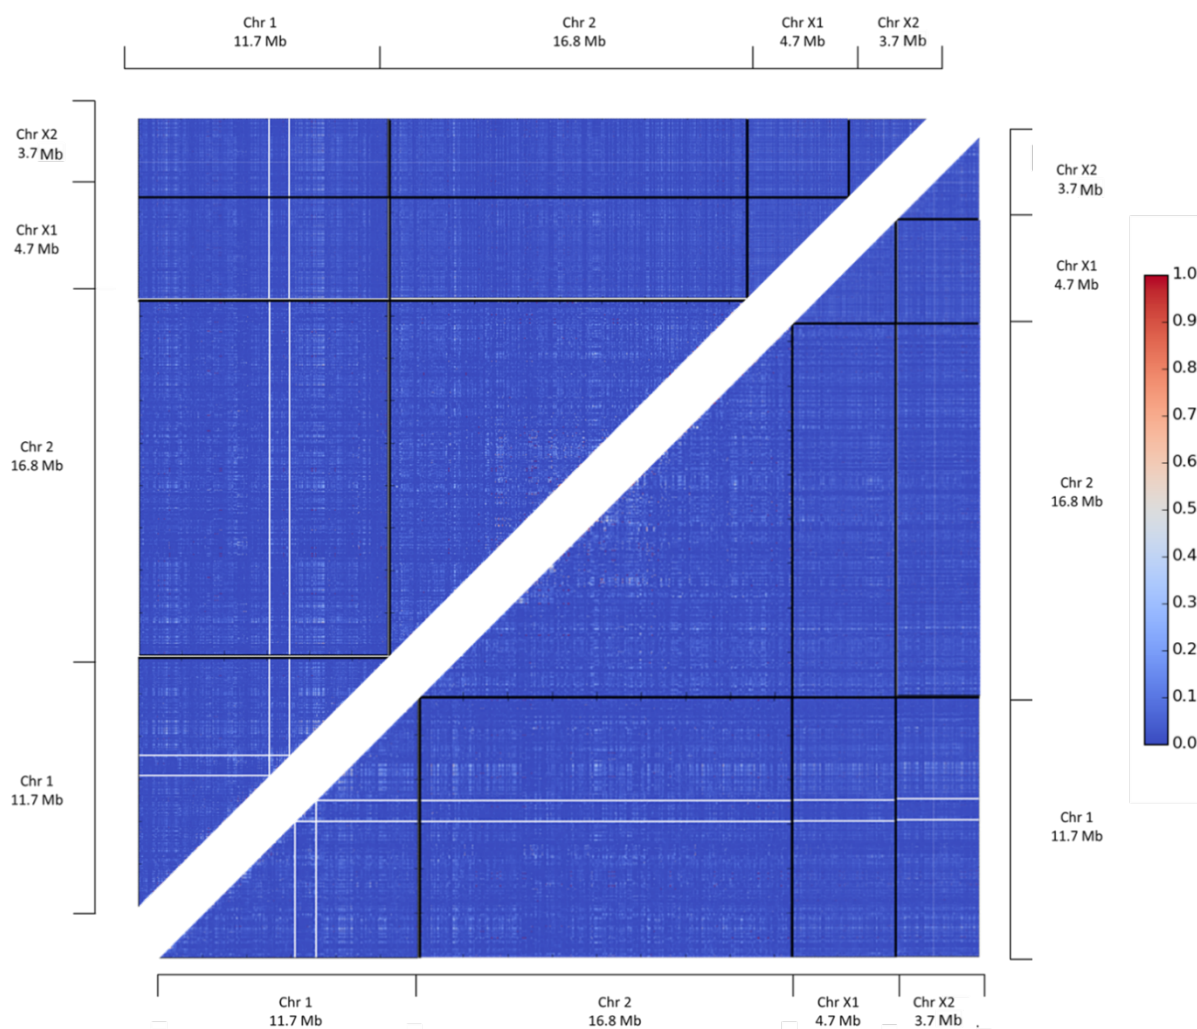

1094  
1095

1096  
1097  
1098

**Supplementary Figure 14. The distribution of SNPs across the *S. rattii* genome.** The distribution of SNPs for all 90 parasites for discrete, 10 Kb windows, each represented by a vertical bar, for chromosomes 1, 2 and the two scaffolds of the X chromosome.

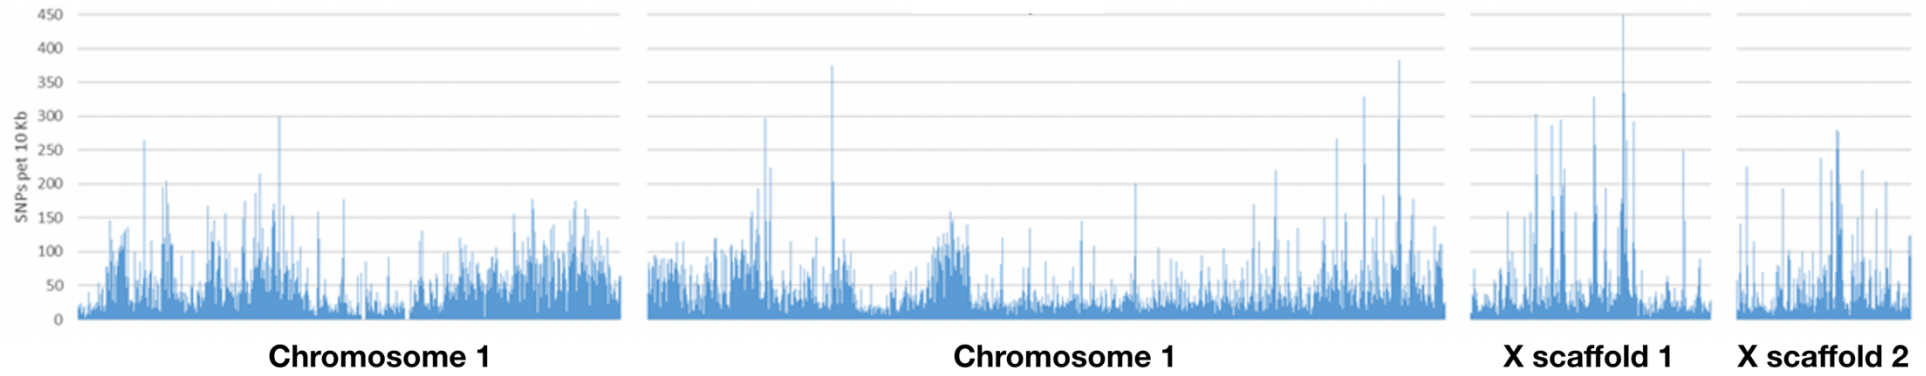

1099  
1100

1101 **Supplementary Figure 15. Neighbour-joining dendrograms based on five expansion**  
1102 **clusters.** Clusters, 6, 7, 8, 12 and 14 are the clusters from which no genes were excluded  
1103 due to concerns about genome assembly. Each tree was calculated based on the entire  
1104 sequence from the start to the end of each cluster (excluding flanking regions). Clades (1 –  
1105 5) and sub-clades (2a and 2b, 4a and 4b) are defined based on the whole genome  
1106 dendrogram (**Figure 3**). Individual parasites are marked with circles coloured according to  
1107 their (sub-)clade in the whole genome dendrogram. Branch lengths are relative such that  
1108 the distance between the two most distant individuals is 1, and so absolute distance differs  
1109 among the panels.

1110 **Expansion Cluster 6**

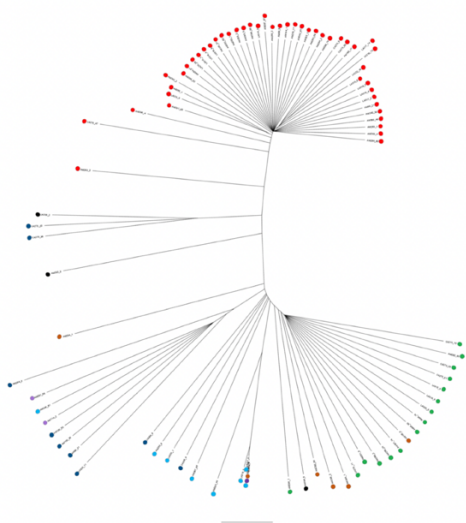

**Expansion Cluster 7**

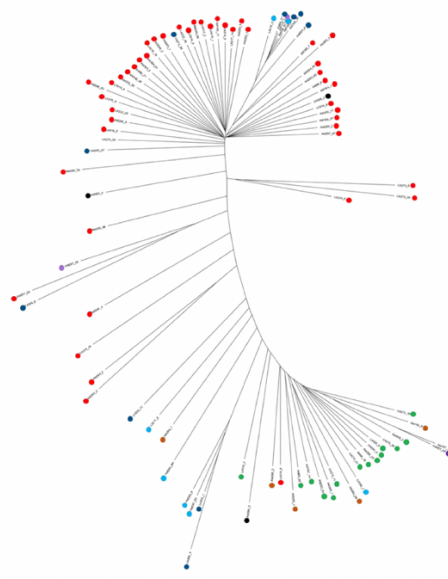

1111  
1112 **Expansion Cluster 8**

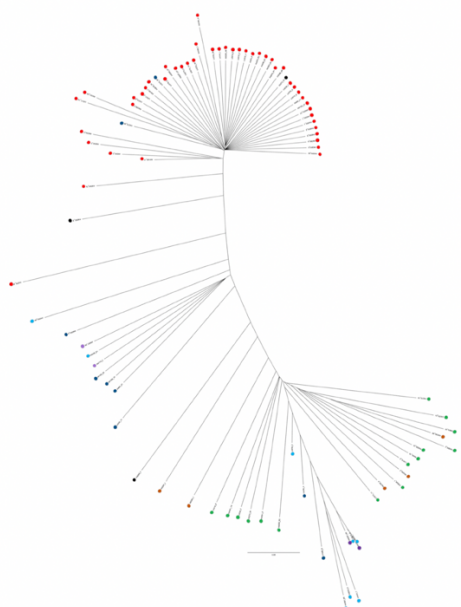

**Expansion Cluster 12**

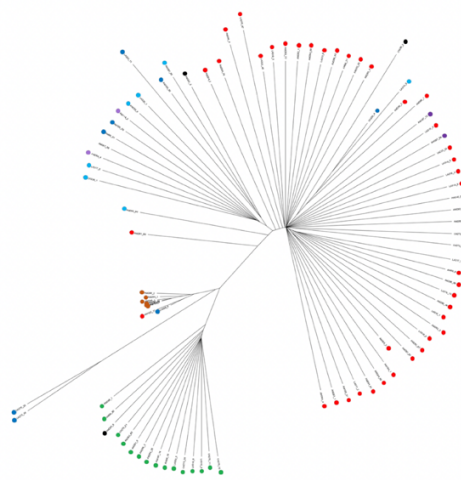

1113  
1114 **Expansion Cluster 14**

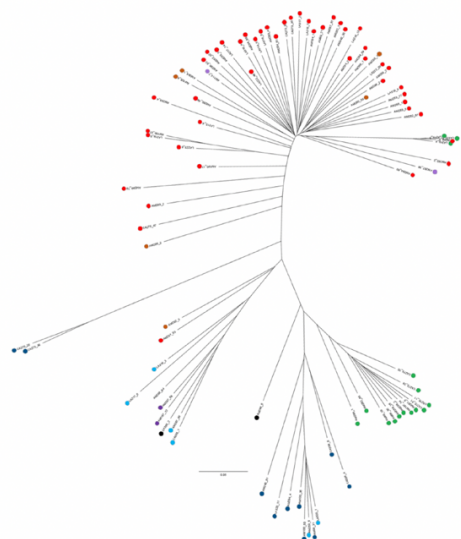

1115

1116 **Supplementary Figure 16. Correlation of read depth and GC content for 90 *S. rattii***  
1117 **larvae.** GC content is measured in non-overlapping 10 kb regions. Correlation  $\rho = 0.783$ ,  $df$   
1118  $= 4,008$ ,  $P < 0.00001$ .  
1119

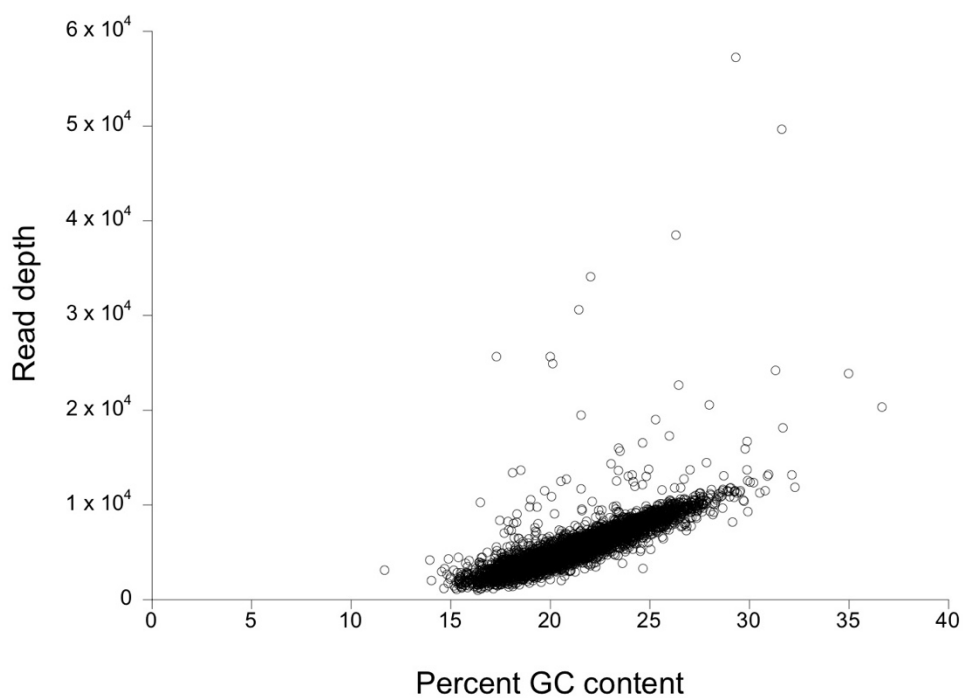

1120
